# Supplementary material for: Solvent-free photochemical decomposition of sulfur hexafluoride by phosphines: formation of difluorophosphoranes as versatile fluorination reagents
Source: Royal Society of Chemistry journal article supplement (doi:10.1039/d2gc02172b), 2022-01-01
Supplement: d2gc02172b2.pdf [file d2gc02172b2.pdf]

## Supplementary Material for

### Solvent-free photochemical decomposition of sulfur hexafluoride by phosphines: Formation of difluorophosphoranes as versatile fluorination reagents

Philipp Rotering,<sup>[a,b]</sup> Christian Mück-Lichtenfeld,<sup>[c]</sup> and Fabian Dielmann\*<sup>[a]</sup>

[a] Institute of General, Inorganic and Theoretical Chemistry, Leopold-Franzens-Universität Innsbruck, Innrain 80-82, 6020 Innsbruck (Austria), E-mail: fabian.dielmann@uibk.ac.at

[b] Institut für Anorganische und Analytische Chemie, Westfälische Wilhelms-Universität Münster, Corrensstrasse 30, 48149 Münster (Germany)

[c] Organisch-Chemisches Institut, Westfälische Wilhelms-Universität Münster, Corrensstrasse 40, 48149 Münster (Germany)

## CONTENTS:

|                                                                       |           |
|-----------------------------------------------------------------------|-----------|
| <b>Synthetic Details</b>                                              | <b>3</b>  |
| <b>Phosphine Screening</b>                                            | <b>4</b>  |
| <b>Control Experiments Without Irradiation</b>                        | <b>20</b> |
| <b>Wavelength Screening</b>                                           | <b>21</b> |
| <b>Synthesis of <i>TPP-Fluor</i></b>                                  | <b>23</b> |
| <b>Large-Scale Synthesis of <i>TPP-Fluor</i></b>                      | <b>24</b> |
| <b>Photochemical Reaction of SF<sub>6</sub> with Alkyl Phosphines</b> | <b>25</b> |
| <b><i>TPP-Fluor</i> as Fluorinating Agent</b>                         | <b>28</b> |
| <b>UV-vis spectroscopy</b>                                            | <b>34</b> |
| <b>DFT Calculations</b>                                               | <b>37</b> |
| <b>Literature</b>                                                     | <b>79</b> |

## Synthetic Details

**General remarks:** All manipulations were performed under an inert atmosphere of dry argon, using standard Schlenk and drybox techniques. Dry and oxygen-free solvents were employed. All glassware was oven-dried at 160 °C prior to use. NMR spectra were recorded at 300 K on Bruker AVANCE I 400 or Bruker AVANCE III 400 spectrometers. Chemical shifts ( $\delta$ ) are given in parts per million (ppm) relative to SiMe<sub>4</sub> (<sup>1</sup>H, <sup>13</sup>C), CFC1<sub>3</sub> (<sup>19</sup>F) or 85% H<sub>3</sub>PO<sub>4</sub> (<sup>31</sup>P) and they were referenced to the residual solvent signals (C<sub>6</sub>D<sub>6</sub>: <sup>1</sup>H  $\delta_{\text{H}}$  = 7.16, <sup>13</sup>C  $\delta_{\text{C}}$  = 128.06; CD<sub>3</sub>CN:  $\delta_{\text{H}}$  = 1.94, <sup>13</sup>C  $\delta_{\text{C}}$  = 118.26; THF-*d*<sub>8</sub>: <sup>1</sup>H  $\delta_{\text{H}}$  = 1.73, <sup>13</sup>C  $\delta_{\text{C}}$  = 67.57, CD<sub>2</sub>Cl<sub>2</sub>: <sup>1</sup>H  $\delta_{\text{H}}$  = 5.32, <sup>13</sup>C  $\delta_{\text{C}}$  = 53.84) or internally by the instrument after locking and shimming to the deuterated solvent (<sup>19</sup>F, <sup>31</sup>P). NMR multiplicities are abbreviated as follows: s = singlet, d = doublet, t = triplet, p = pentet, sept = septet, m = multiplet, br = broad signal.

**Reagents and Handling:** Ph<sub>2</sub>(pyrrolidine)P<sup>[1]</sup>, Ph(N(iPr)<sub>2</sub>)<sub>2</sub>P<sup>[2]</sup> and Ph<sub>2</sub>(2-NMe<sub>2</sub>-C<sub>6</sub>H<sub>4</sub>)P<sup>[3]</sup> were synthesized according to the literature. Sulfur hexafluoride 3.0 (99.9%) was generously donated by the company DILO GmbH. All other compounds were purchased from commercial sources (Sigma Aldrich, Alfa Aesar, abcr GmbH) and used as received.

**Irradiation:** Irradiations were performed with a Seoulviosys LED Type CUD1KFMA (310 nm), EvoluChem™ LED Type P205-18-1 (365 nm), EvoluChem™ LED Type P206-18-1 (405 nm), EvoluChem™ LED Type P201-18-2 (450 nm), or VCCilite LED Type VAOL-SA1xAx-SA (585 nm).

EvoluChem™ LEDs were used in combination with the EvoluChem™ PhotoRedOx Box and show a relative irradiance of 8 mW/cm<sup>2</sup> (365 nm) or 28 mW/cm<sup>2</sup> (405 nm) in the set-up.

For large-scale synthesis of *TPP-Fluor* we used an array of 72 x Luminus SST-10-UV with  $\lambda$  = 365 nm and a total radiometric flux of  $\Phi$  = 63 Watt.

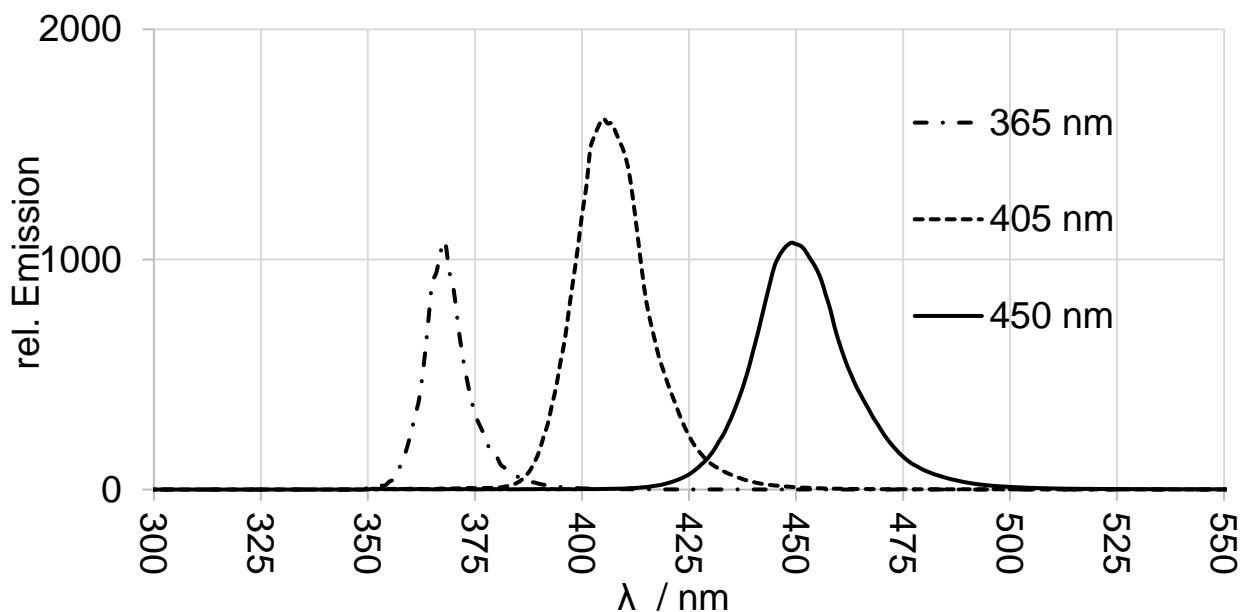

**Figure S1:** Emission spectra of the EvoluChem™ LEDs used in the present study (provided by HepatoChem Inc.).

# Phosphine Screening

General procedure for the reaction of phosphines with SF<sub>6</sub>: The indicated amount of phosphine was dissolved in the indicated solvent in a teflon-sealed glass vessel. The solution was frozen in liquid nitrogen and the argon atmosphere was removed *in vacuo*. After warming the solution to room temperature, the vessel was pressurized with SF<sub>6</sub> (2 bar) and was subsequently irradiated with UV light ( $\lambda = 365$  nm) for 12 h. The reaction mixture was analysed using NMR spectroscopy. The conversion was determined by <sup>31</sup>P NMR spectroscopy.

## Triphenylphosphine Ph<sub>3</sub>P:

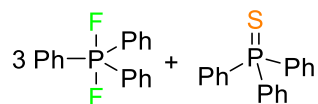

A solution of Ph<sub>3</sub>P (1.00 g, 3.81 mmol) in MeCN (5 mL) was irradiated according to the general procedure, giving a 3:1 mixture of triphenyldifluorophosphorane and triphenylphosphine sulfide (*TPP-Fluor*) in quantitative yield. *TPP-Fluor* was isolated as a white solid after removal of the volatiles *in vacuo*. The reaction gave similar results using THF, toluene, benzene, butanone, propylene carbonate, sulfolane or dimethylformamide as the solvent.

<sup>1</sup>H NMR (CD<sub>2</sub>Cl<sub>2</sub>, 400 MHz)  $\delta$  (ppm) = 8.07 – 7.98 (m, Ar-H), 7.77 – 7.70 (m, Ar-H), 7.58 – 7.44 (m, Ar-H).

<sup>13</sup>C{<sup>1</sup>H} NMR (CD<sub>2</sub>Cl<sub>2</sub>, 100 MHz)  $\delta$  (ppm) = 137.7 (m), 136.2 (m), 134.1 (m), 133.8, 133.2, 132.6 (m), 132.0 (m), 131.9 (m), 129.10 – 128.53 (m).

<sup>19</sup>F NMR (CD<sub>2</sub>Cl<sub>2</sub>, 376 MHz)  $\delta$  (ppm) = -39.5 (d, <sup>1</sup>J<sub>PF</sub> = 659.5 Hz, Ph<sub>3</sub>PF<sub>2</sub>).

<sup>31</sup>P NMR (CD<sub>2</sub>Cl<sub>2</sub>, 160 MHz)  $\delta$  (ppm) = 43.0 (m, Ph<sub>3</sub>PS), -54.9 (t, <sup>1</sup>J<sub>PF</sub> = 659.5 Hz, Ph<sub>3</sub>PF<sub>2</sub>).

<sup>19</sup>F NMR (CDCl<sub>3</sub>, 376 MHz)  $\delta$  (ppm) = -39.8 (d, <sup>1</sup>J<sub>PF</sub> = 659.8 Hz, Ph<sub>3</sub>PF<sub>2</sub>).

<sup>31</sup>P NMR (CDCl<sub>3</sub>, 160 MHz)  $\delta$  (ppm) = 43.3 (m, Ph<sub>3</sub>PS), -54.6 (t, <sup>1</sup>J<sub>PF</sub> = 659.8 Hz, Ph<sub>3</sub>PF<sub>2</sub>).

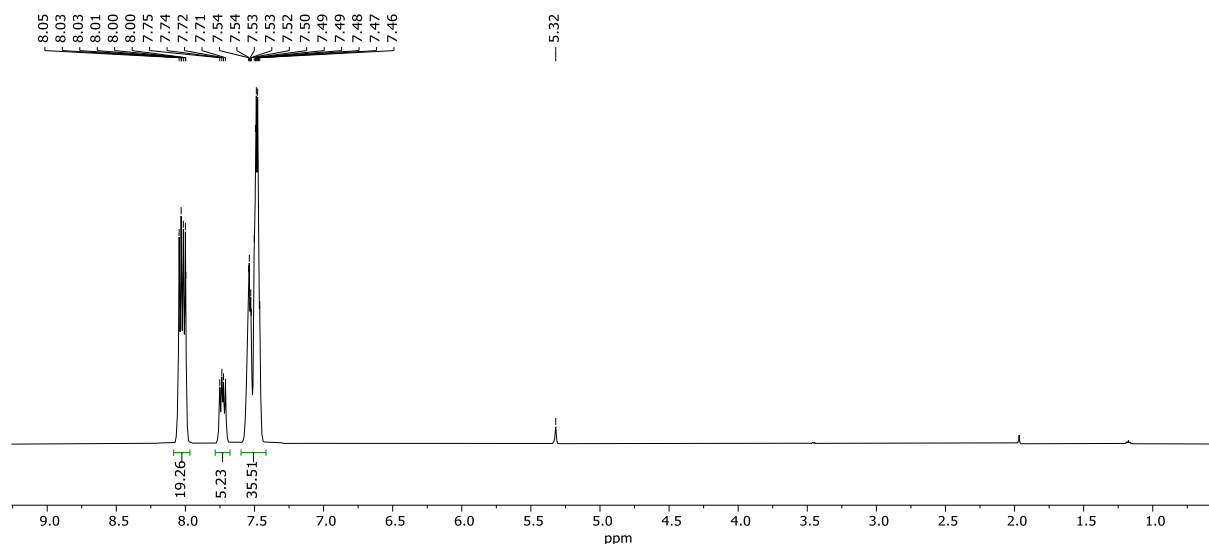

**Figure S2:** <sup>1</sup>H NMR spectrum (CD<sub>2</sub>Cl<sub>2</sub>, 300 K, 400 MHz) of the isolated solid containing Ph<sub>3</sub>PF<sub>2</sub> and Ph<sub>3</sub>PS in a ratio of 3:1.

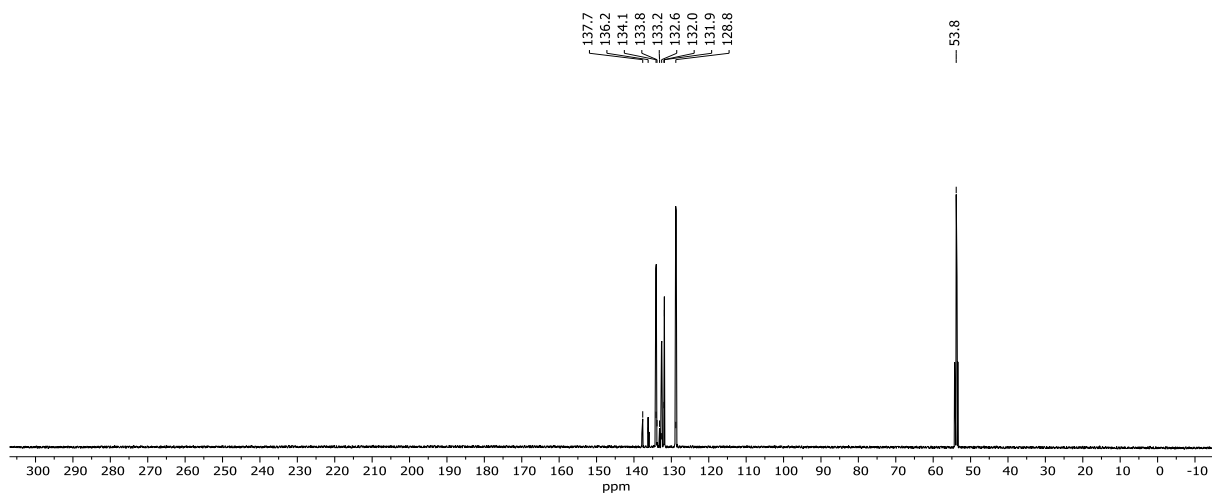

**Figure S3:**  $^{13}\text{C}\{^1\text{H}\}$  NMR spectrum ( $\text{CD}_2\text{Cl}_2$ , 300 K, 100 MHz) of the isolated solid containing  $\text{Ph}_3\text{PF}_2$  and  $\text{Ph}_3\text{PS}$  in a ratio of 3:1.

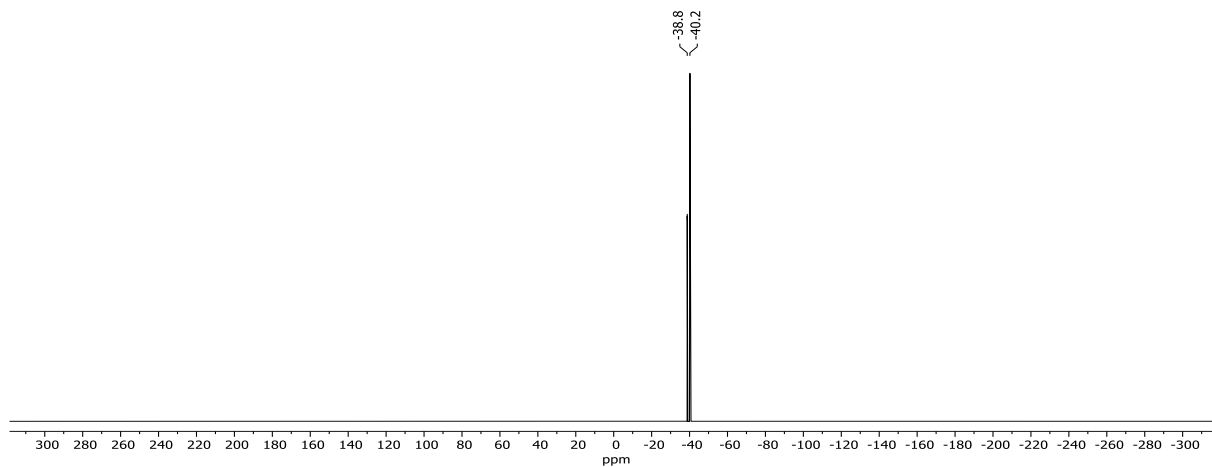

**Figure S4:**  $^{19}\text{F}$  NMR spectrum ( $\text{CD}_2\text{Cl}_2$ , 300 K, 376 MHz) of the isolated solid containing  $\text{Ph}_3\text{PF}_2$  and  $\text{Ph}_3\text{PS}$  in a ratio of 3:1.

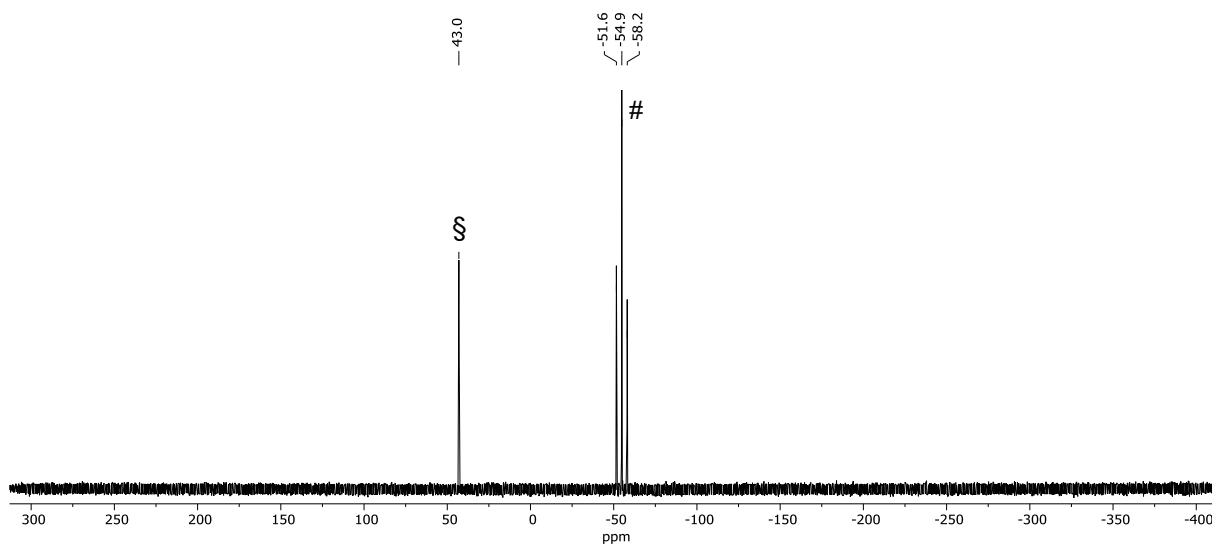

**Figure S5:**  $^{31}\text{P}$  NMR spectrum ( $\text{CD}_2\text{Cl}_2$ , 300 K, 160 MHz) of the isolated solid containing  $\text{Ph}_3\text{PF}_2$  (#) and  $\text{Ph}_3\text{PS}$  (§) in a ratio of 3:1.

### Isolation of Ph<sub>3</sub>PF<sub>2</sub>:

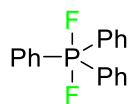

The isolated solid containing Ph<sub>3</sub>PF<sub>2</sub> and Ph<sub>3</sub>PS in a ratio of 3:1 (150 mg, 0.126 mmol) was suspended in  $\alpha,\alpha,\alpha$ -trifluorotoluene. Gentle heating gave a clear solution that was then allowed to cool to room temperature. The formed crystalline material was isolated by filtration and it was washed with  $\alpha,\alpha,\alpha$ -trifluorotoluene (1 mL) to afford Ph<sub>3</sub>PF<sub>2</sub> as colourless crystals in 81% yield.

<sup>1</sup>H NMR (CD<sub>2</sub>Cl<sub>2</sub>, 400 MHz)  $\delta$  (ppm) = 8.01 (m, 2H, Ar-H), 7.53 (m, 1H, Ar-H), 7.48 (m, 2H, Ar-H).

<sup>13</sup>C{<sup>1</sup>H} NMR (CD<sub>2</sub>Cl<sub>2</sub>, 100 MHz)  $\delta$  (ppm) = 134.1(dt,  $J$  = 12.8 Hz,  $J$  = 9.0 Hz, Ar-H), 131.8 (m, Ar-H), 128.8 (dd,  $J$  = 16.6 Hz,  $J$  = 1.6 Hz, Ar-H).

<sup>19</sup>F NMR (CD<sub>2</sub>Cl<sub>2</sub>, 376 MHz)  $\delta$  (ppm) = -39.5 (d,  $^1J_{PF}$  = 659.5 Hz, Ph<sub>3</sub>PF<sub>2</sub>).

<sup>31</sup>P NMR (CD<sub>2</sub>Cl<sub>2</sub>, 160 MHz)  $\delta$  (ppm) = -54.9 (t,  $^1J_{PF}$  = 659.5 Hz, Ph<sub>3</sub>PF<sub>2</sub>).

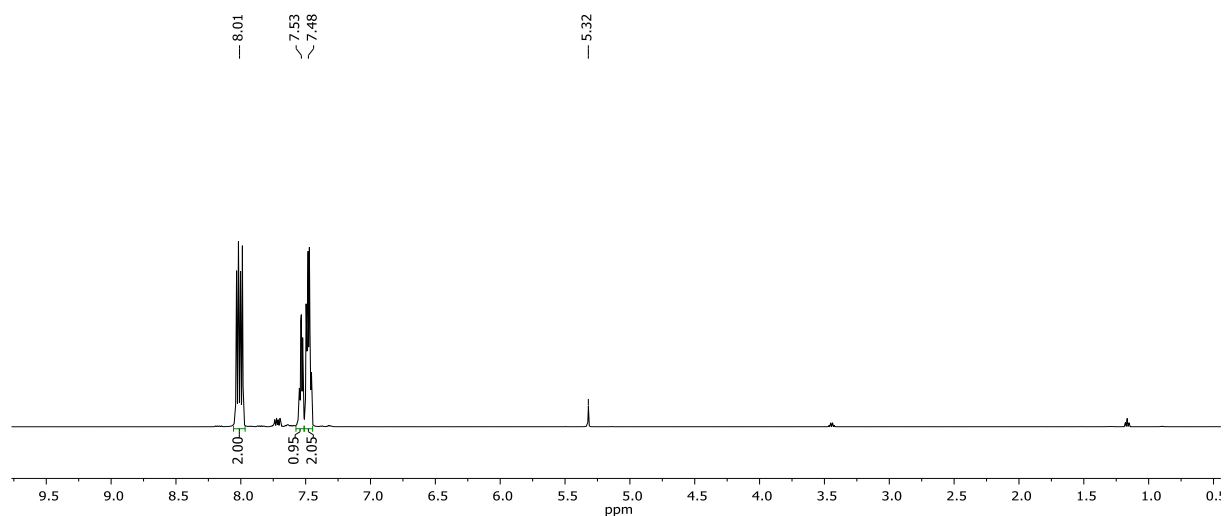

**Figure S6:** <sup>1</sup>H NMR spectrum (CD<sub>2</sub>Cl<sub>2</sub>, 300 K, 400 MHz) of Ph<sub>3</sub>PF<sub>2</sub>.

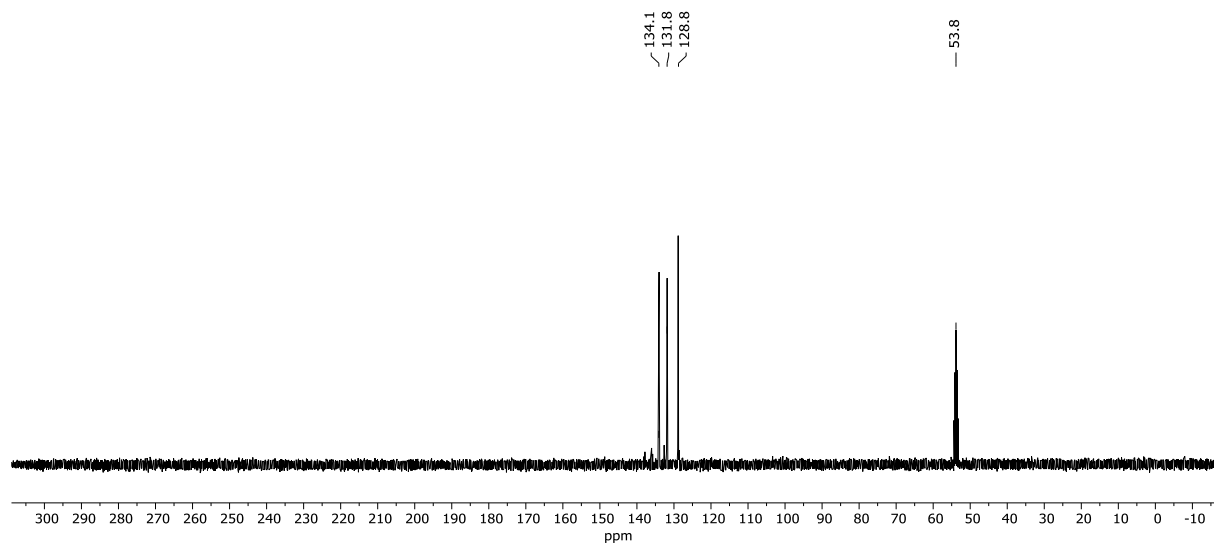

**Figure S7:** <sup>13</sup>C{<sup>1</sup>H} NMR spectrum (CD<sub>2</sub>Cl<sub>2</sub>, 300 K, 100 MHz) of Ph<sub>3</sub>PF<sub>2</sub>.

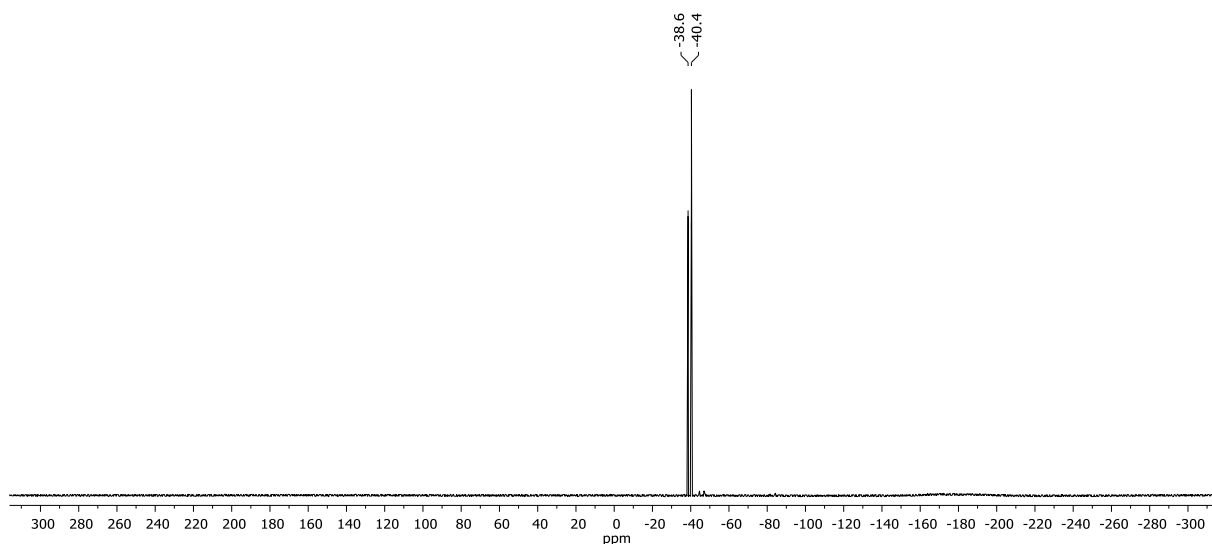

**Figure S8:**  $^{19}\text{F}$  NMR spectrum ( $\text{CD}_2\text{Cl}_2$ , 300 K, 376 MHz) of  $\text{Ph}_3\text{PF}_2$ .

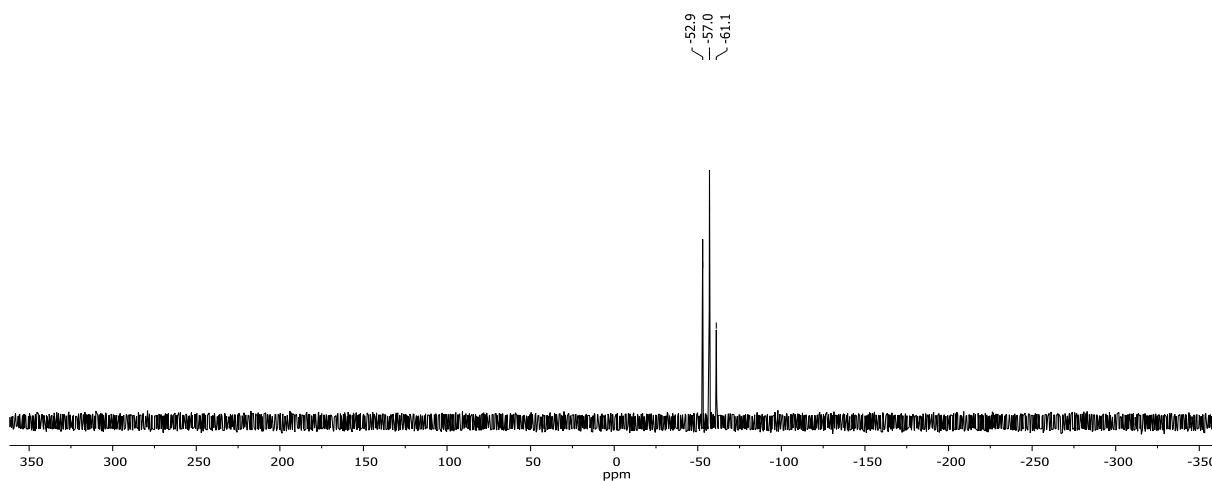

**Figure S9:**  $^{31}\text{P}$  NMR spectrum ( $\text{CD}_2\text{Cl}_2$ , 300 K, 160 MHz) of  $\text{Ph}_3\text{PF}_2$ .

### (Diethylamino)diphenylphosphine ( $\text{Et}_2\text{N}$ ) $\text{Ph}_2\text{P}$

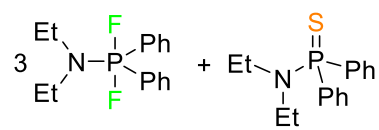

According to the general procedure, a solution of (diethylamino)diphenylphosphine (39 mg, 0.15 mmol) in  $\text{MeCN-}d_3$  (0.7 mL) was irradiated, resulting in 89% conversion to a 3:1 mixture of  $(\text{Et}_2\text{N})\text{Ph}_2\text{PF}_2$  and  $(\text{Et}_2\text{N})\text{Ph}_2\text{PS}$ .

$^1\text{H}$  NMR ( $\text{MeCN-}d_3$ , 500 MHz)  $\delta$  (ppm) = 7.99 (m, Ar-H), 7.82 – 7.69 (m, Ar-H), 7.93 – 7.80 (m, Ar-H) 7.59 – 7.30 (m, Ar-H), 3.21 (m, 12H,  $\text{CH}_2$ ), 3.09 – 2.94 (m, 4H,  $\text{CH}_2$ ), 1.16 (t,  $J = 6.9$  Hz, 18H,  $\text{CH}_3$ ), 1.06 (t,  $J = 7.1$  Hz, 6H,  $\text{CH}_3$ ).

$^{19}\text{F}$  NMR ( $\text{MeCN-}d_3$ , 376 MHz)  $\delta$  (ppm) = -37.3 (d,  $^1J_{\text{PF}} = 694.5$  Hz,  $\text{R}_3\text{PF}_2$ ).

$^{31}\text{P}$  NMR ( $\text{MeCN-}d_3$ , 160 MHz)  $\delta$  (ppm) = 67.6 (m,  $\text{R}_3\text{PS}$ ), -49.9 (t,  $^1J_{\text{PF}} = 694.5$  Hz,  $\text{R}_3\text{PF}_2$ ).

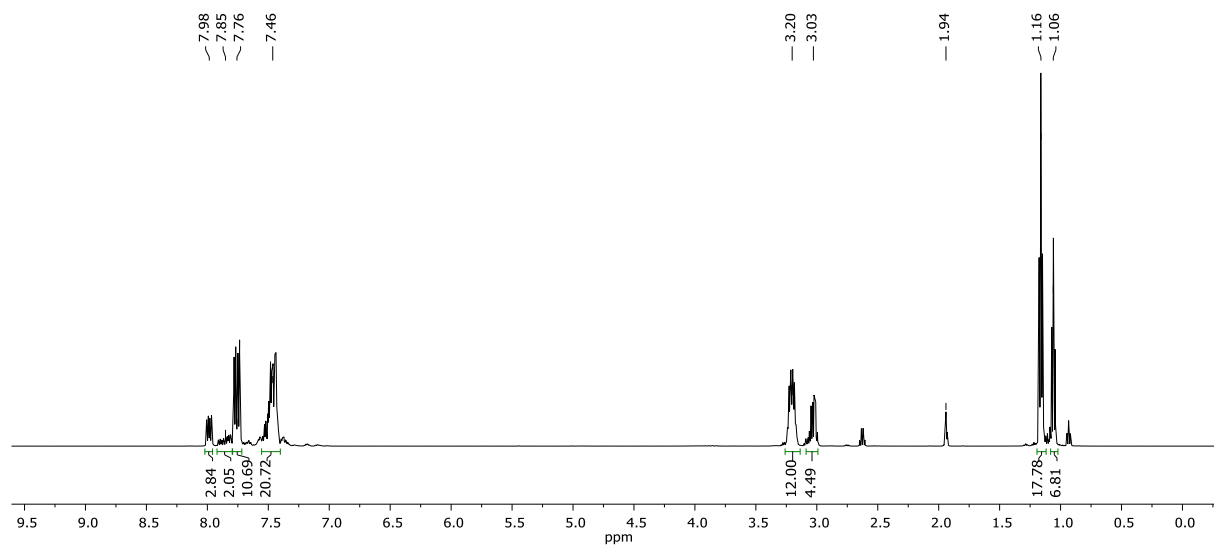

**Figure S10:**  $^1\text{H}$  NMR spectrum (MeCN- $d_3$ , 300 K, 400 MHz) of the reaction solution containing  $(\text{Et}_2\text{N})\text{Ph}_2\text{P}$ ,  $(\text{Et}_2\text{N})\text{Ph}_2\text{PF}_2$  and  $(\text{Et}_2\text{N})\text{Ph}_2\text{PS}$ .

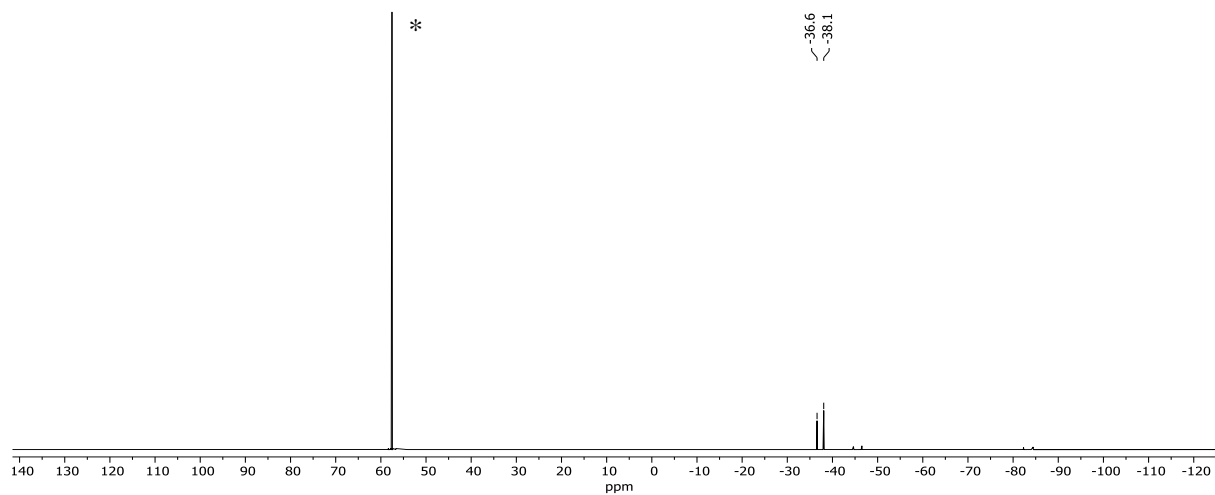

**Figure S11:**  $^{19}\text{F}$  NMR spectrum (MeCN- $d_3$ , 300 K, 376 MHz) of the reaction solution containing  $(\text{Et}_2\text{N})\text{Ph}_2\text{P}$ ,  $(\text{Et}_2\text{N})\text{Ph}_2\text{PF}_2$  and  $(\text{Et}_2\text{N})\text{Ph}_2\text{PS}$ . \*  $\text{SF}_6$



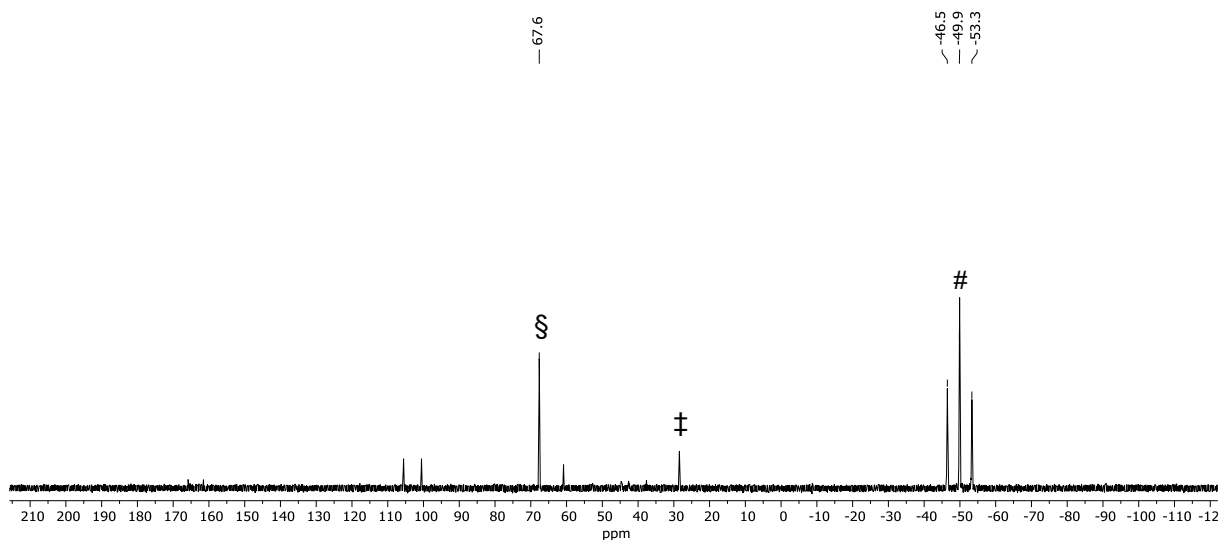

**Figure S12:**  $^{31}\text{P}$  NMR spectrum (MeCN- $d_3$ , 300 K, 160 MHz) of the reaction solution containing (Et $_2$ N)Ph $_2$ P (‡), (Et $_2$ N)Ph $_2$ PF $_2$  (#) and (Et $_2$ N)Ph $_2$ PS (§).

### Diphenyl(pyrrolidine)phosphine (pyr)Ph $_2$ P

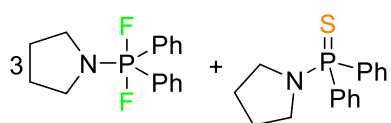

According to the general procedure, a solution of diphenyl(pyrrolidine)phosphine (38 mg, 0.15 mmol) in MeCN- $d_3$  (0.7 mL) was irradiated, resulting in 92% conversion to a 3:1 mixture of (pyr)Ph $_2$ PF $_2$  and (pyr)Ph $_2$ PS.

$^1\text{H}$  NMR (MeCN- $d_3$ , 500 MHz)  $\delta$  (ppm) = 8.10 – 7.99 (m, Ar-H), 7.94 – 7.82 (m, Ar-H), 7.81 – 7.74 (m, Ar-H), 7.61 – 7.54 (m, Ar-H), 7.54 – 7.38 (m, Ar-H), 3.42 (m, CH $_2$ ), 2.99 – 2.88 (m, CH $_2$ ), 1.94 (m, CH $_2$ ), 1.89 – 1.76 (m, CH $_2$ ).

$^{13}\text{C}\{^1\text{H}\}$  NMR (MeCN- $d_3$ , 126 MHz)  $\delta$  (ppm) = 141.4 (m), 139.8 (m), 135.3 (m), 132.9 – 132.5 (m), 132.3 (m), 131.7 – 131.3 (m), 129.6 (m), 129.1 (m), 49.5 (m), 48.0 (m), 27.1 (m), 26.7 (m).

$^{19}\text{F}$  NMR (MeCN- $d_3$ , 376 MHz)  $\delta$  (ppm) = -32.1 (d,  $^1J_{\text{PF}}$  = 681.7 Hz, R $_3$ PF $_2$ ).

$^{31}\text{P}$  NMR (MeCN- $d_3$ , 160 MHz)  $\delta$  (ppm) = 64.4 (m, R $_3$ PS), -53.4 (t,  $^1J_{\text{PF}}$  = 681.7 Hz, R $_3$ PF $_2$ ).

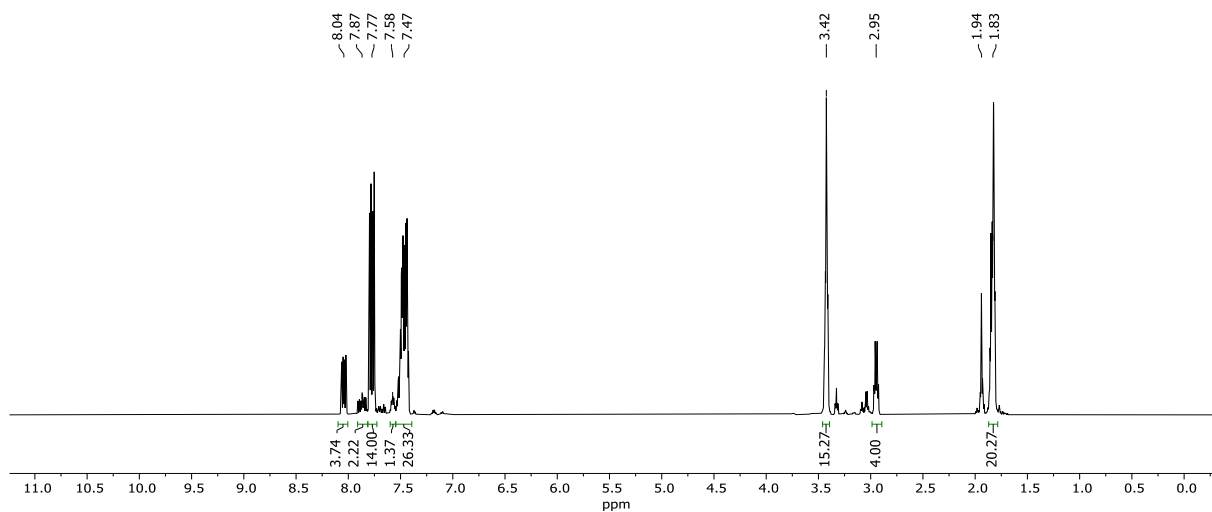

**Figure S13:**  $^1\text{H}$  NMR spectrum ( $\text{MeCN-}d_3$ , 300 K, 400 MHz) of the reaction solution containing  $(\text{pyr})\text{Ph}_2\text{P}$ ,  $(\text{pyr})\text{Ph}_2\text{PF}_2$  and  $(\text{pyr})\text{Ph}_2\text{PS}$ .

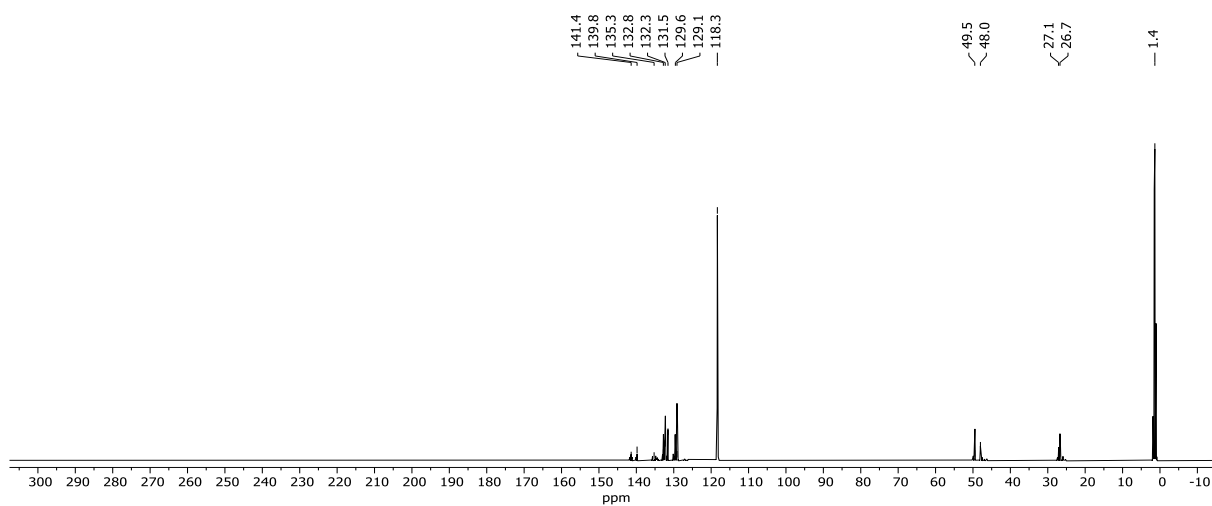

**Figure S14:**  $^{13}\text{C}\{^1\text{H}\}$  NMR spectrum ( $\text{MeCN-}d_3$ , 300 K, 100 MHz) of the reaction solution containing  $(\text{pyr})\text{Ph}_2\text{P}$ ,  $(\text{pyr})\text{Ph}_2\text{PF}_2$  and  $(\text{pyr})\text{Ph}_2\text{PS}$ .

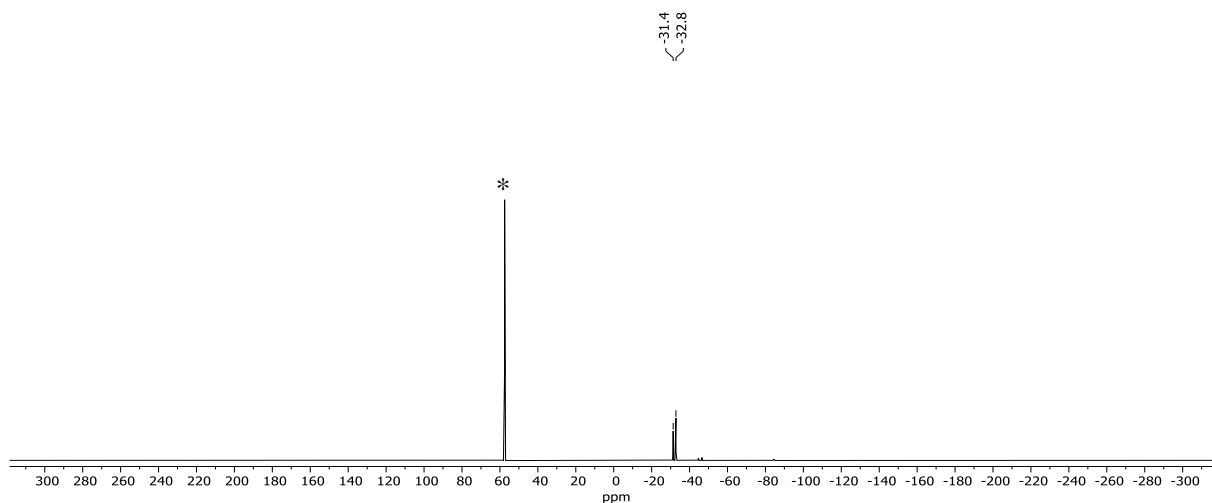

**Figure S15:**  $^{19}\text{F}$  NMR spectrum ( $\text{MeCN-}d_3$ , 300 K, 376 MHz) of the reaction solution containing  $(\text{pyr})\text{Ph}_2\text{P}$ ,  $(\text{pyr})\text{Ph}_2\text{PF}_2$  and  $(\text{pyr})\text{Ph}_2\text{PS}$ . \*  $\text{SF}_6$

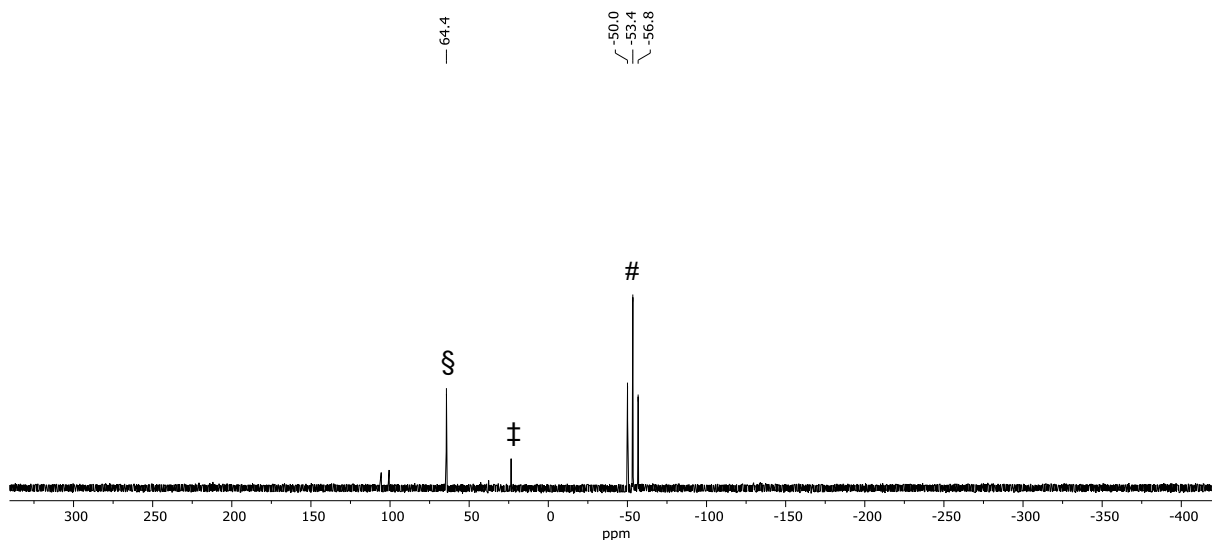

**Figure S16:**  $^{31}\text{P}$  NMR spectrum (MeCN- $d_3$ , 300 K, 160 MHz) of the reaction solution containing (pyr)Ph $_2$ P (§), (pyr)Ph $_2$ PF $_2$  (#) and (pyr)Ph $_2$ PS (‡).

### (Diisopropylamino)phenylphosphine (iPr $_2$ N) $_2$ PhP

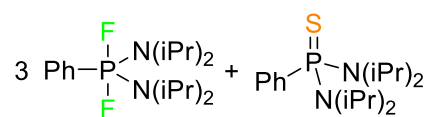

According to the general procedure, a solution of (diisopropylamino)phenylphosphine (46 mg, 0.15 mmol) in THF (0.7 mL) was irradiated, resulting in 60% conversion to a 3:1 mixture of (iPr $_2$ N) $_2$ PhPF $_2$  and (iPr $_2$ N) $_2$ PhPS.

$^{19}\text{F}$  NMR (THF, 376 MHz)  $\delta$  (ppm) = -36.7 (d,  $^1J_{\text{PF}} = 732.5$  Hz, R $_3$ PF $_2$ ).

$^{31}\text{P}$  NMR (THF, 160 MHz)  $\delta$  (ppm) = 58.4 (m, R $_3$ PS), -48.8 (t,  $^1J_{\text{PF}} = 732.5$  Hz, R $_3$ PF $_2$ ).

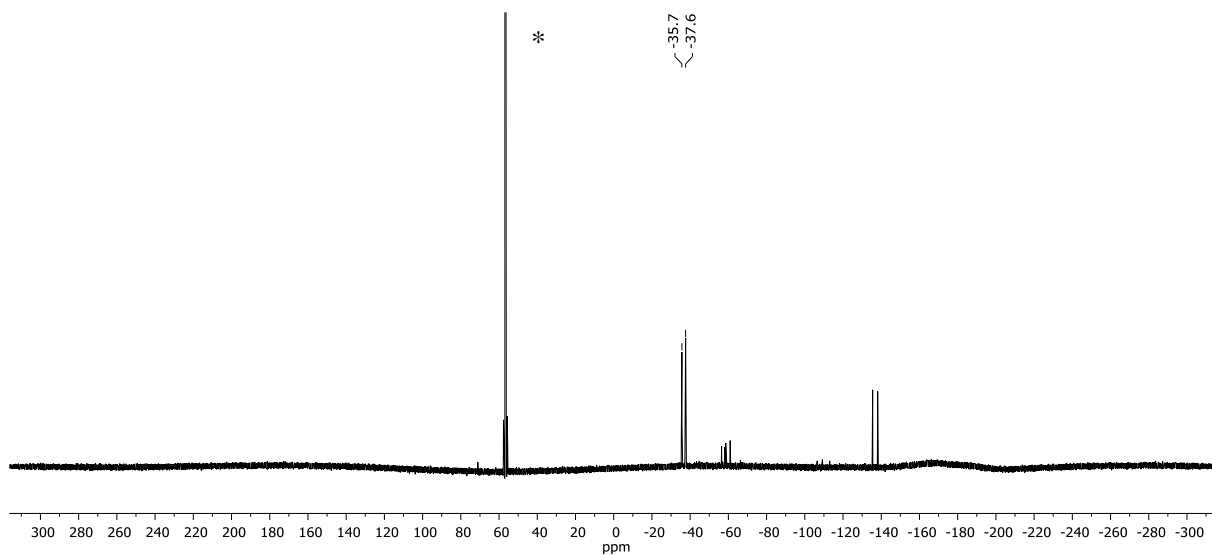

**Figure S17:**  $^{19}\text{F}$  NMR spectrum (THF, 300 K, 376 MHz) of the reaction solution containing (iPr $_2$ N) $_2$ PhP, (iPr $_2$ N) $_2$ PhPF $_2$  and (iPr $_2$ N) $_2$ PhPS. \* SF $_6$

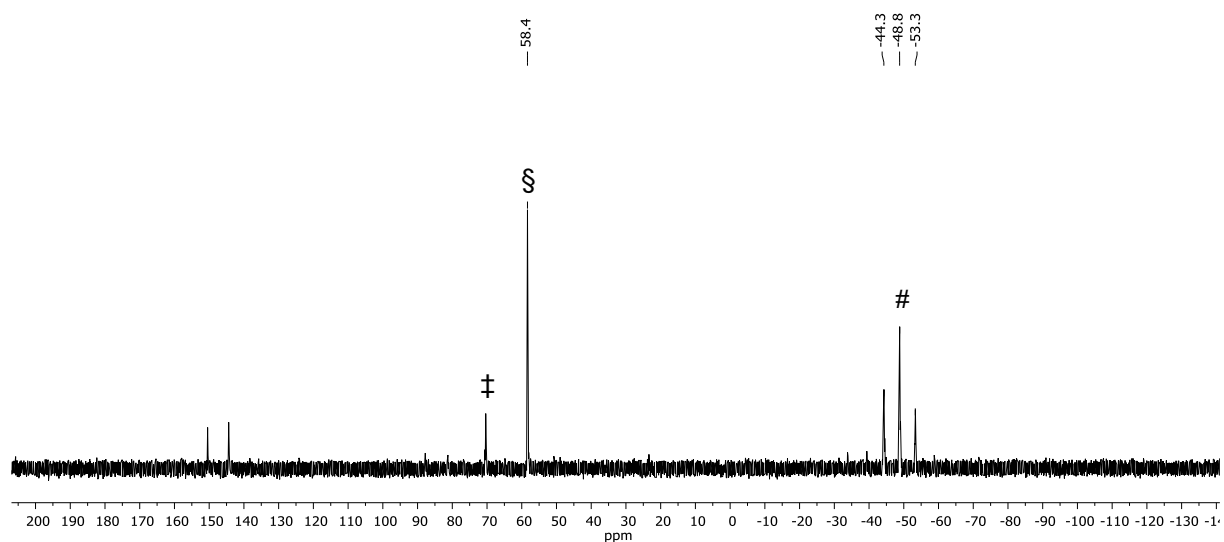

**Figure S18:**  $^{31}\text{P}$  NMR spectrum (THF, 300 K, 160 MHz) of the reaction solution containing  $(\text{iPr}_2\text{N})_2\text{PhP}$  ( $\ddagger$ ),  $(\text{iPr}_2\text{N})_2\text{PhPF}_2$  ( $\#$ ) and  $(\text{iPr}_2\text{N})_2\text{PhPS}$  ( $\S$ ).

### **Tris(dimethylamino)phosphine ( $\text{Me}_2\text{N}$ ) $_3\text{P}$**

According to the general procedure, a solution of tris(dimethylamino)phosphine (24 mg, 0.15 mmol) in THF (0.7 mL) was irradiated. The  $^{31}\text{P}$  NMR spectrum of the reaction mixture was identical to that of the starting material indicating no reaction of tris(dimethylamino)phosphine with  $\text{SF}_6$ .

### **Tri-*tert*-butylphosphine *t*Bu $_3\text{P}$**

According to the general procedure, a solution of tri-*tert*-butylphosphine (30 mg, 0.15 mmol) in THF (0.7 mL) was irradiated. The  $^{31}\text{P}$  NMR spectrum of the reaction mixture was identical to that of the starting material indicating no reaction of the alkylphosphines with  $\text{SF}_6$ .

### **Tri-*n*-butylphosphine *n*Bu $_3\text{P}$**

According to the general procedure, a solution of tri-*n*-butylphosphine (30 mg, 0.15 mmol) in THF (0.7 mL) was irradiated. The  $^{31}\text{P}$  NMR spectrum of the reaction mixture was identical to that of the starting material indicating no reaction of the alkylphosphines with  $\text{SF}_6$ .

### **Triphenyl phosphite ( $\text{PhO}$ ) $_3\text{P}$**

Following the general procedure, a solution of triphenyl phosphite (47 mg, 0.15 mmol) in THF (0.7 mL) was irradiated. The  $^{31}\text{P}$  NMR spectrum of the reaction mixture was identical to that of the starting material indicating no reaction of triphenyl phosphite with  $\text{SF}_6$ .

### **Triethyl phosphite ( $\text{EtO}$ ) $_3\text{P}$**

Following the general procedure, a solution of triethyl phosphite (25 mg, 0.15 mmol) in THF (0.7 mL) was irradiated. The  $^{31}\text{P}$  NMR spectrum of the reaction mixture was identical to that of the starting material indicating no reaction of triethyl phosphite with  $\text{SF}_6$ .

### Tri(*o*-tolyl)phosphine (*o*-tol)<sub>3</sub>P

According to the general procedure, a solution of (*o*-tol)<sub>3</sub>P (46 mg, 0.15 mmol) in THF (0.7 mL) was irradiated. The <sup>31</sup>P NMR spectrum of the reaction mixture showed the resonances of two new phosphorus species. An identical <sup>31</sup>P NMR spectrum was obtained, when the irradiation was performed in the absence of SF<sub>6</sub> under an argon atmosphere, consistent with a photochemical decomposition of the phosphine.

When using a LED with a longer wavelength (405 nm) according the general procedure no reaction was observed.

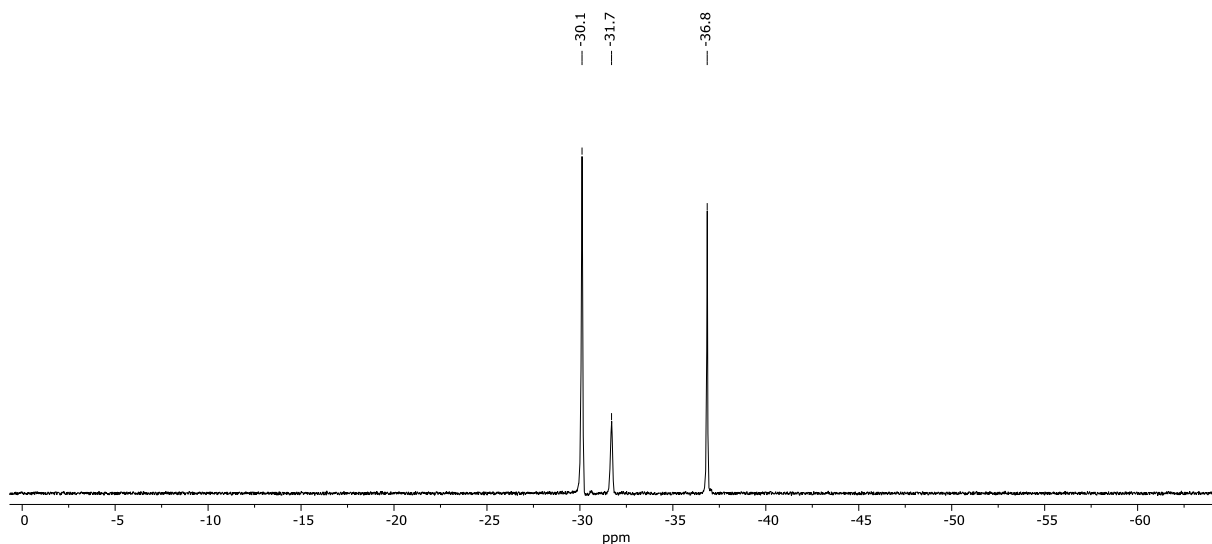

**Figure S19:** <sup>31</sup>P NMR spectrum (THF, 300 K, 160 MHz) of the reaction mixture with SF<sub>6</sub> after irradiation.

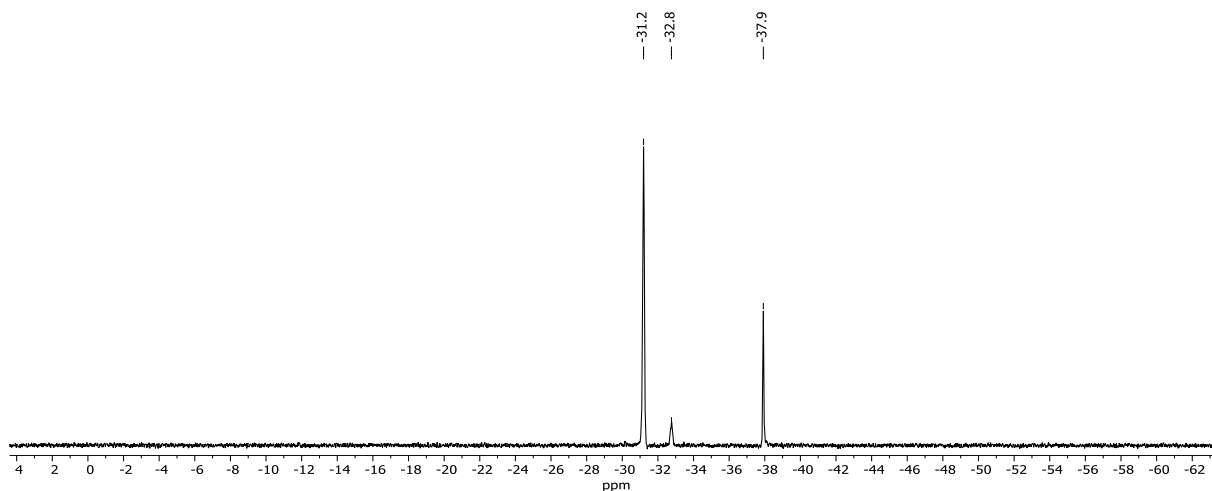

**Figure S20:** <sup>31</sup>P NMR spectrum (THF, 300 K, 160 MHz) of the reaction mixture without SF<sub>6</sub> after irradiation.

### Tris(2,4,6-trimethylphenyl)phosphine (Mes)<sub>3</sub>P

According to the general procedure, a solution of tris(2,4,6-trimethylphenyl)phosphine (58 mg, 0.09 mmol) in THF (0.7 mL) was irradiated. The <sup>31</sup>P NMR spectrum of the reaction mixture was identical to that obtained when irradiated in the absence of SF<sub>6</sub> under an argon atmosphere, consistent with a photochemical

decomposition of the phosphine. The same reactivity was observed when using a LED with a longer wavelength (405 nm).

### Tris(pentafluorophenyl)phosphine (C<sub>6</sub>F<sub>5</sub>)<sub>3</sub>P

According to the general procedure, a solution of tris(pentafluorophenyl)phosphine (80 mg, 0.15 mmol) in THF (0.7 mL) was irradiated. The <sup>31</sup>P NMR spectrum of the reaction mixture was identical to that of the starting materials indicating no reaction of tris(pentafluorophenyl)phosphine with SF<sub>6</sub>.

### 2-Diphenylphosphino-2'-(N,N-dimethylamino)-biphenyl

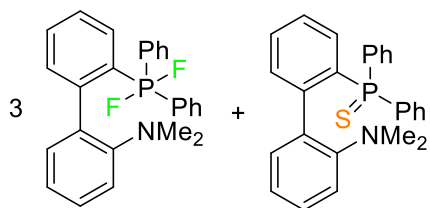

According to the general procedure, a suspension of 2-Diphenylphosphino-2'-(N,N-dimethylamino)-biphenyl (57 mg, 0.15 mmol) in MeCN (0.7 mL) was irradiated. The volatiles were evaporated to afford a brown oil. The <sup>31</sup>P NMR spectrum indicated complete consumption of the phosphine and formation of a 3:1 mixture of the corresponding difluorophosphorane and phosphine

sulfide in 97% yield.

<sup>1</sup>H NMR (CD<sub>2</sub>Cl<sub>2</sub>, 400 MHz) δ (ppm) = 7.83 (m, Ar-H), 7.60 (m, Ar-H), 7.58 – 7.52 (m, Ar-H), 7.48 – 7.22 (m, Ar-H), 7.13 – 6.98 (m, Ar-H), 6.68 (m, Ar-H), 6.58 (m, Ar-H), 2.35 (s, NMe<sub>2</sub>).

<sup>13</sup>C{<sup>1</sup>H} NMR (CD<sub>2</sub>Cl<sub>2</sub>, 100 MHz) δ (ppm) = 151.4, 136.0 (m), 133.1, 132.2, 132.0, 131.7 (m), 130.2 (m), 129.5 – 129.1 (m), 129.0 – 128.1 (m), 126.5 (m), 120.6, 118.1, 43.5.

<sup>19</sup>F NMR (CD<sub>2</sub>Cl<sub>2</sub>, 376 MHz) δ (ppm) = -39.0 (d, <sup>1</sup>J<sub>PF</sub> = 677.0 Hz, R<sub>3</sub>PF<sub>2</sub>).

<sup>31</sup>P NMR (CD<sub>2</sub>Cl<sub>2</sub>, 160 MHz) δ (ppm) = 43.3 (m, R<sub>3</sub>PS), -51.9 (t, <sup>1</sup>J<sub>PF</sub> = 677.0 Hz, R<sub>3</sub>PF<sub>2</sub>).

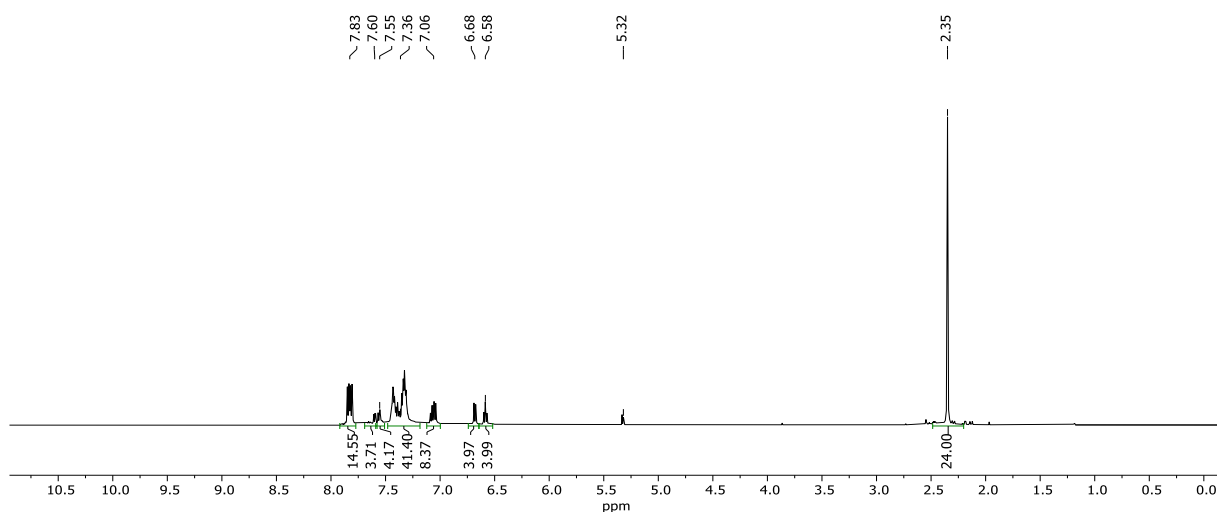

**Figure S21:** <sup>1</sup>H NMR spectrum (CD<sub>2</sub>Cl<sub>2</sub>, 300 K, 400 MHz) of the isolated oil containing RPh<sub>2</sub>P, RPh<sub>2</sub>PF<sub>2</sub> and RPh<sub>2</sub>PS (R = dimethylamino-biphenyl).

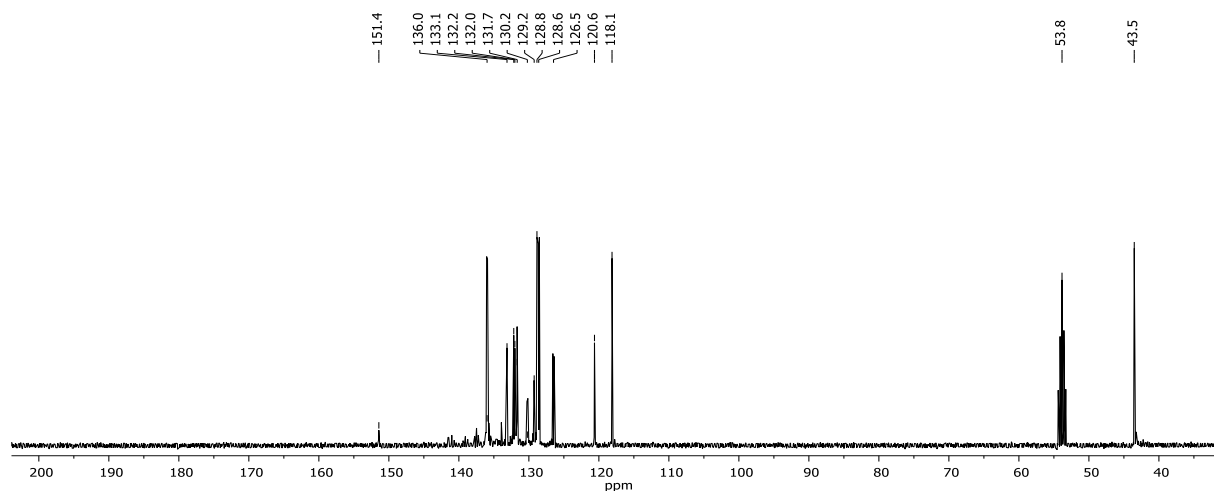

**Figure S22:**  $^{13}\text{C}\{^1\text{H}\}$  NMR spectrum ( $\text{CD}_2\text{Cl}_2$ , 300 K, 100 MHz) of the isolated oil containing  $\text{RPh}_2\text{P}$ ,  $\text{RPh}_2\text{PF}_2$  and  $\text{RPh}_2\text{PS}$  (R = dimethylamino-biphenyl).

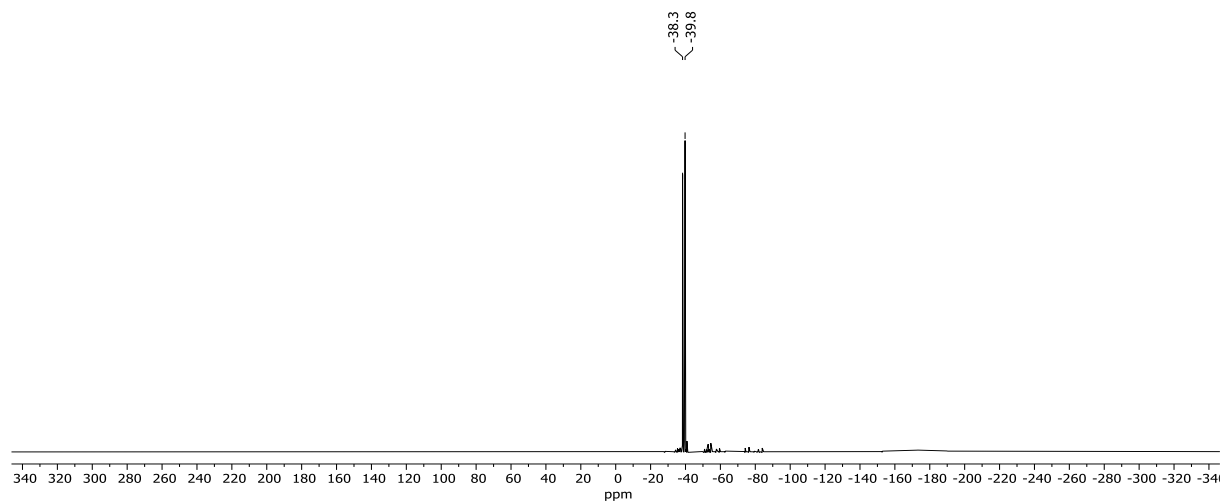

**Figure S23:**  $^{19}\text{F}$  NMR spectrum ( $\text{CD}_2\text{Cl}_2$ , 300 K, 376 MHz) of the isolated oil containing  $\text{RPh}_2\text{P}$ ,  $\text{RPh}_2\text{PF}_2$  and  $\text{RPh}_2\text{PS}$  (R = dimethylamino-biphenyl).

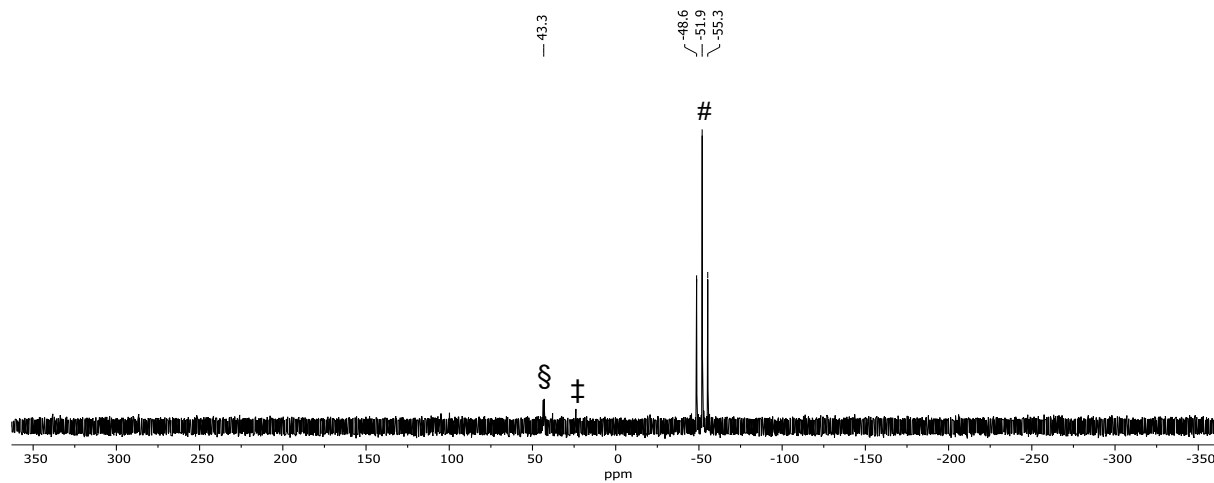

**Figure S24:**  $^{31}\text{P}$  NMR spectrum ( $\text{CD}_2\text{Cl}_2$ , 300 K, 160 MHz) of the isolated oil containing  $\text{RPh}_2\text{P}$  (§),  $\text{RPh}_2\text{PF}_2$  (#) and  $\text{RPh}_2\text{PS}$  (§) (R = dimethylamino-biphenyl).

### Tris(2-methoxyphenyl)phosphine (2-MeO-C<sub>6</sub>H<sub>4</sub>)<sub>3</sub>P

Following the general procedure, a solution of tris(2-methoxyphenyl)phosphine (53 mg, 0.15 mmol) in THF (0.7 mL) was irradiated. The <sup>31</sup>P NMR spectrum of the reaction mixture was identical to that of the starting materials indicating no reaction of tris(2-methoxyphenyl)phosphine with SF<sub>6</sub>.

### Tris(4-methoxyphenyl)phosphine (4-MeO-C<sub>6</sub>H<sub>4</sub>)<sub>3</sub>P

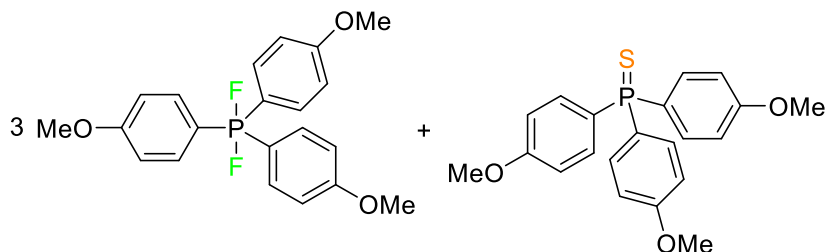

According to the general procedure, a suspension of tris(4-methoxy-phenyl)phosphine (53 mg, 0.15 mmol) in MeCN (0.7 mL) was irradiated. The volatiles were evaporated to afford a brown oil. The <sup>31</sup>P NMR spectrum indicated complete

consumption of the phosphine and formation of a 3:1 mixture of the corresponding difluorophosphorane and phosphine sulfide in 98% yield.

<sup>1</sup>H NMR (MeCN-*d*<sub>3</sub>, 400 MHz)  $\delta$  (ppm) = 8.15 – 7.85 (m, Ar-H), 7.61 (m, Ar-H), 6.98 (m, Ar-H), 3.79 (s, OMe).

<sup>13</sup>C{<sup>1</sup>H} NMR (MeCN-*d*<sub>3</sub>, 100 MHz)  $\delta$  (ppm) = 164.0 – 161.3 (m), 136.9 (m), 136.0 – 133.5 (m), 130.0 (m), 128.1 (m), 126.2, 125.3, 115.7 – 113.8 (m), 56.2 (m).

<sup>19</sup>F NMR (MeCN-*d*<sub>3</sub>, 376 MHz)  $\delta$  (ppm) = -42.6 (d, <sup>1</sup>J<sub>PF</sub> = 652.2 Hz, R<sub>3</sub>PF<sub>2</sub>).

<sup>31</sup>P NMR (MeCN-*d*<sub>3</sub>, 160 MHz)  $\delta$  (ppm) = 40.2 (s, R<sub>3</sub>PS), -59.5 (t, <sup>1</sup>J<sub>PF</sub> = 652.2 Hz, R<sub>3</sub>PF<sub>2</sub>).

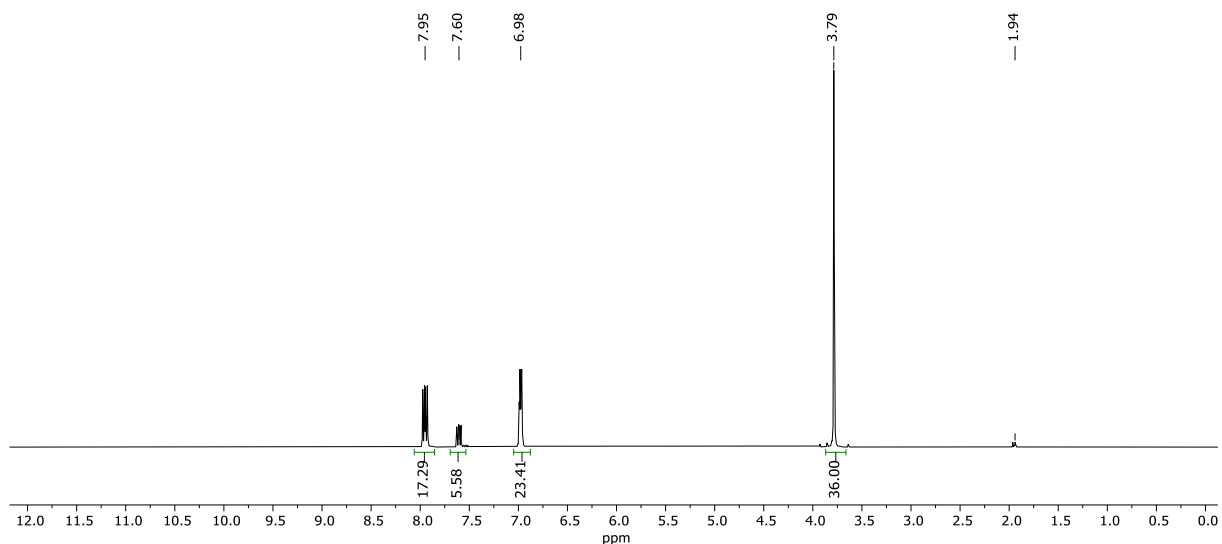

**Figure S25:** <sup>1</sup>H NMR spectrum (MeCN-*d*<sub>3</sub>, 300 K, 400 MHz) of the isolated oil containing (4-MeO-C<sub>6</sub>H<sub>4</sub>)<sub>3</sub>P, (4-MeO-C<sub>6</sub>H<sub>4</sub>)<sub>3</sub>PF<sub>2</sub> and (4-MeO-C<sub>6</sub>H<sub>4</sub>)<sub>3</sub>PS.



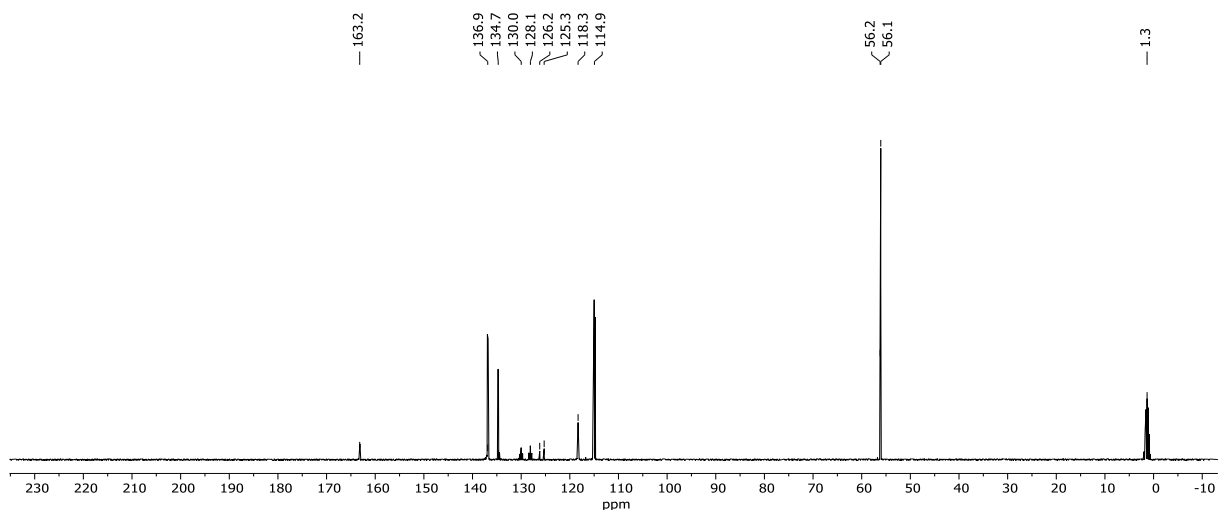

**Figure S26:**  $^{13}\text{C}\{^1\text{H}\}$  NMR spectrum (MeCN- $d_3$ , 300 K, 100 MHz) of the isolated oil containing (4-MeO-C $_6$ H $_4$ ) $_3$ P, (4-MeO-C $_6$ H $_4$ ) $_3$ PF $_2$  and (4-MeO-C $_6$ H $_4$ ) $_3$ PS.

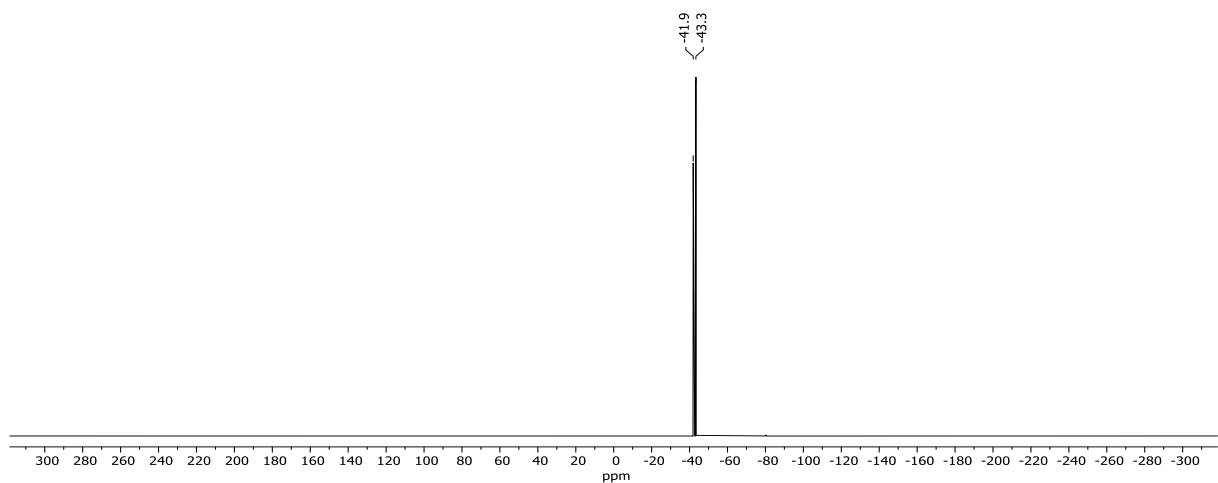

**Figure S27:**  $^{19}\text{F}$  NMR spectrum (MeCN- $d_3$ , 300 K, 376 MHz) of the isolated oil containing (4-MeO-C $_6$ H $_4$ ) $_3$ P, (4-MeO-C $_6$ H $_4$ ) $_3$ PF $_2$  and (4-MeO-C $_6$ H $_4$ ) $_3$ PS.

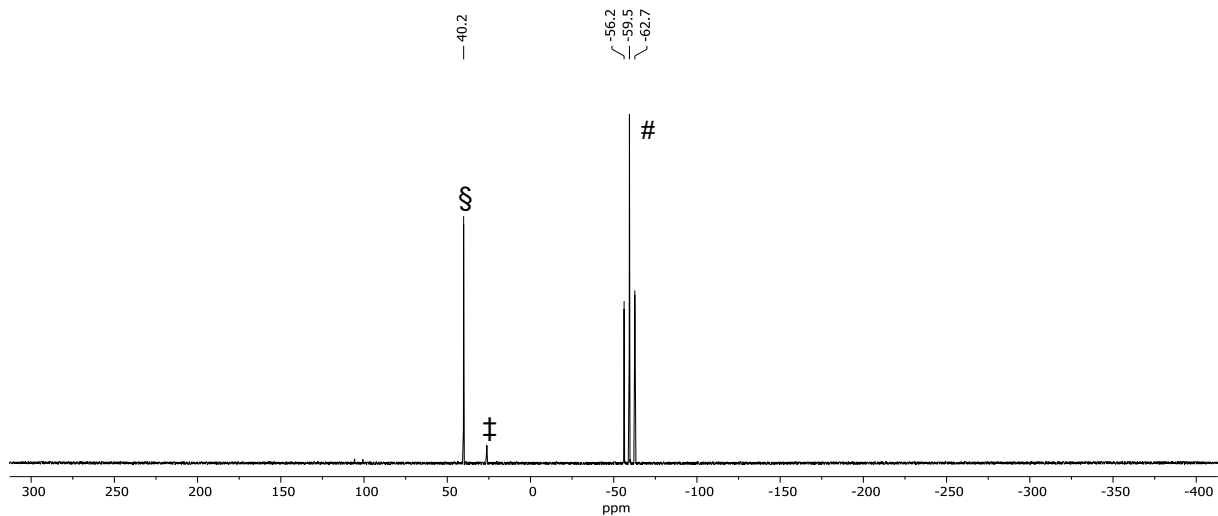

**Figure S28:**  $^{31}\text{P}$  NMR spectrum (MeCN- $d_3$ , 300 K, 160 MHz) of the isolated oil containing (4-MeO-C $_6$ H $_4$ ) $_3$ P (‡), (4-MeO-C $_6$ H $_4$ ) $_3$ PF $_2$  (#) and (4-MeO-C $_6$ H $_4$ ) $_3$ PS (§).

## 2-(Diphenylphosphino)-N,N-dimethylaniline ( $\text{Me}_2\text{NC}_6\text{H}_4\text{Ph}_2\text{P}$ )

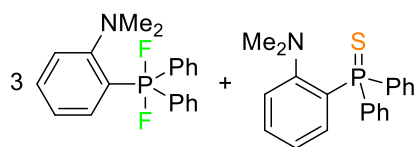

According to the general procedure, a solution of 2-(Diphenylphosphino)-N,N-dimethylaniline (46 mg, 0.15 mmol) in benzene-*d*<sub>6</sub> (0.7 mL) was irradiated. The <sup>31</sup>P NMR spectrum of the reaction mixture indicated 96% conversion to a 3:1 mixture of (Me<sub>2</sub>NC<sub>6</sub>H<sub>4</sub>)Ph<sub>2</sub>PF<sub>2</sub> and (Me<sub>2</sub>NC<sub>6</sub>H<sub>4</sub>)Ph<sub>2</sub>PS.

<sup>1</sup>H NMR (MeCN-*d*<sub>3</sub>, 500 MHz)  $\delta$  (ppm) = 8.38 (m, Ar-H), 8.09 – 7.89 (m, Ar-H), 7.47 (m, Ar-H), 7.42 – 7.30 (m, Ar-H), 7.28 – 6.60 (m, Ar-H), 2.29 (s, Me), 2.26 (s, Me).

<sup>19</sup>F NMR (MeCN-*d*<sub>3</sub>, 376 MHz)  $\delta$  (ppm) = -36.0 (d, <sup>1</sup>J<sub>PF</sub> = 666.5 Hz, R<sub>3</sub>PF<sub>2</sub>).

<sup>31</sup>P NMR (MeCN-*d*<sub>3</sub>, 160 MHz)  $\delta$  (ppm) = 39.2 (m, R<sub>3</sub>PS), -49.7 (t, <sup>1</sup>J<sub>PF</sub> = 666.5 Hz, R<sub>3</sub>PF<sub>2</sub>).

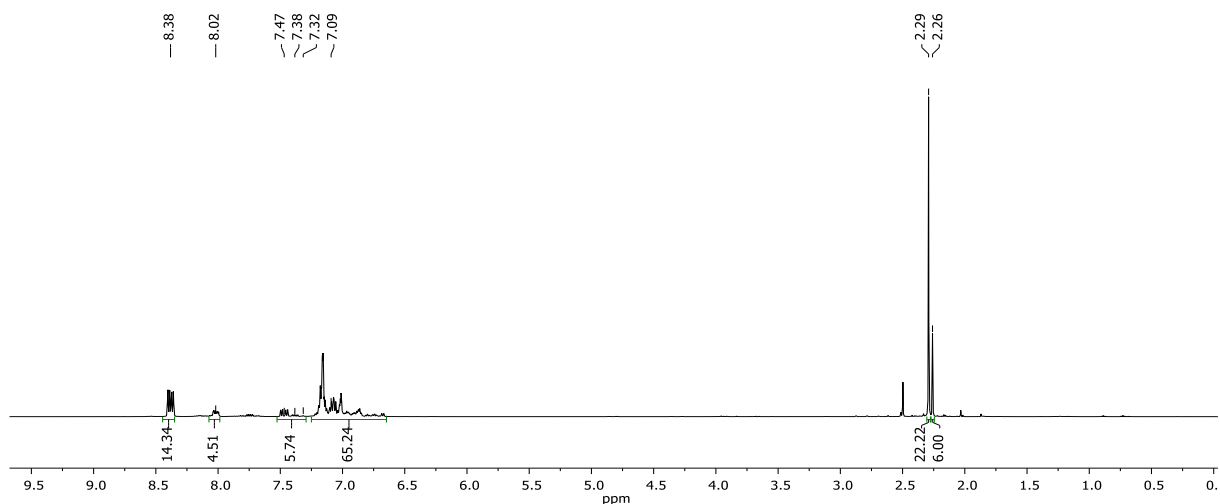

**Figure S29:** <sup>1</sup>H NMR spectrum (benzene-*d*<sub>6</sub>, 300 K, 400 MHz) of the reaction mixture containing (Me<sub>2</sub>NC<sub>6</sub>H<sub>4</sub>)Ph<sub>2</sub>PF<sub>2</sub> and (Me<sub>2</sub>NC<sub>6</sub>H<sub>4</sub>)Ph<sub>2</sub>PS.

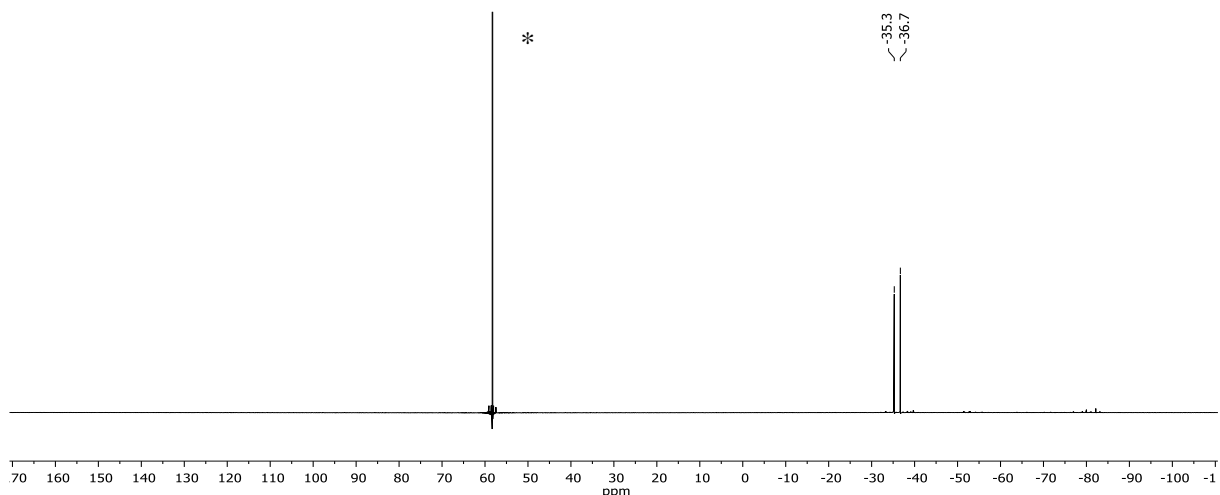

**Figure S30:** <sup>19</sup>F NMR spectrum (benzene-*d*<sub>6</sub>, 300 K, 376 MHz) of the reaction mixture containing (Me<sub>2</sub>NC<sub>6</sub>H<sub>4</sub>)Ph<sub>2</sub>PF<sub>2</sub> and (Me<sub>2</sub>NC<sub>6</sub>H<sub>4</sub>)Ph<sub>2</sub>PS. \* SF<sub>6</sub>

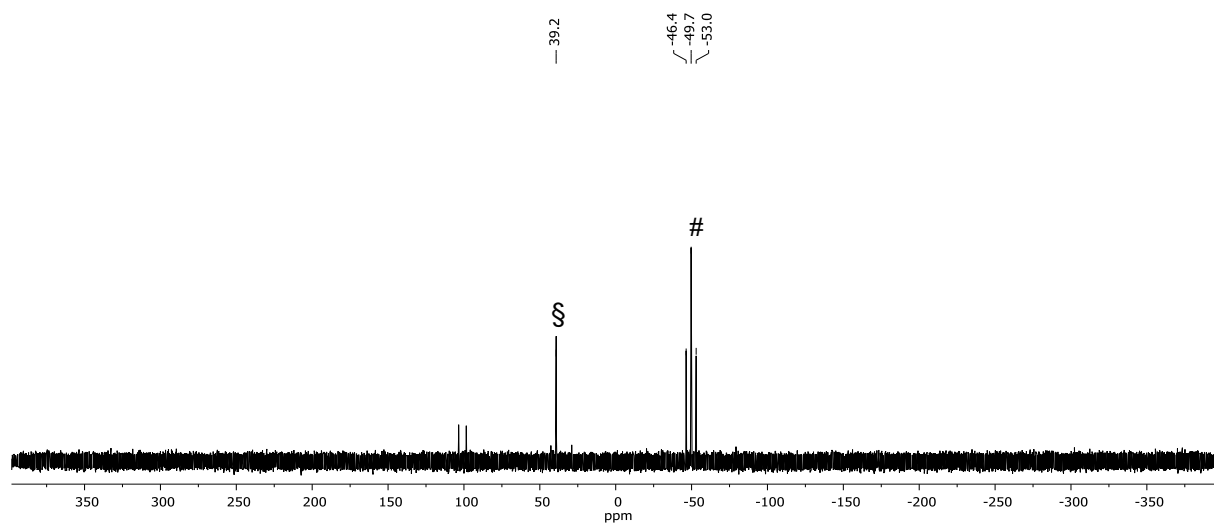

**Figure S31:**  $^{31}\text{P}$  NMR spectrum (benzene- $d_6$ , 300 K, 160 MHz) of the reaction mixture containing  $(\text{Me}_2\text{NC}_6\text{H}_4)\text{Ph}_2\text{PF}_2$  (#) and  $(\text{Me}_2\text{NC}_6\text{H}_4)\text{Ph}_2\text{PS}$  (§).

## Control Experiments Without Irradiation

Ph<sub>3</sub>P (30 mg, 0.115 mmol) was heated at 300 °C for 4 h under SF<sub>6</sub> atmosphere (2 bar). After cooling to room temperature, the resulting solid was analysed by <sup>19</sup>F and <sup>31</sup>P NMR spectroscopy. The spectra indicate no reaction of Ph<sub>3</sub>P with SF<sub>6</sub>.

(OEt)<sub>3</sub>P (50 mg, 0.30 mmol) was refluxed under an SF<sub>6</sub> atmosphere (2 bar) for 24 h. After cooling to room temperature, the reaction mixture was analysed by <sup>19</sup>F and <sup>31</sup>P NMR spectroscopy. The spectra indicate no reaction of Ph<sub>3</sub>P with SF<sub>6</sub>.

A thermal reaction of (*n*Bu)<sub>3</sub>P with SF<sub>6</sub> was observed at high temperature in refluxing (*n*Bu)<sub>3</sub>P (b.p. 240 °C). Multiple decomposition products were observed in the <sup>19</sup>F and <sup>31</sup>P NMR spectra of the product mixture. At lower temperatures (120 °C) no reaction of (*n*Bu)<sub>3</sub>P with SF<sub>6</sub> was observed.

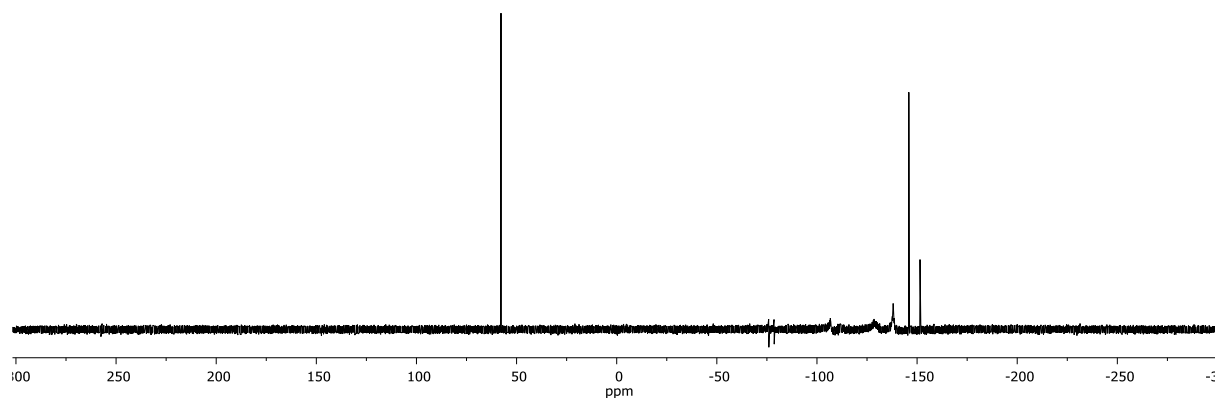

**Figure S32:** <sup>19</sup>F NMR spectrum (THF-*d*<sub>8</sub>, 300 K, 376 MHz) of the product mixture after refluxing (*n*Bu)<sub>3</sub>P under SF<sub>6</sub> atmosphere.

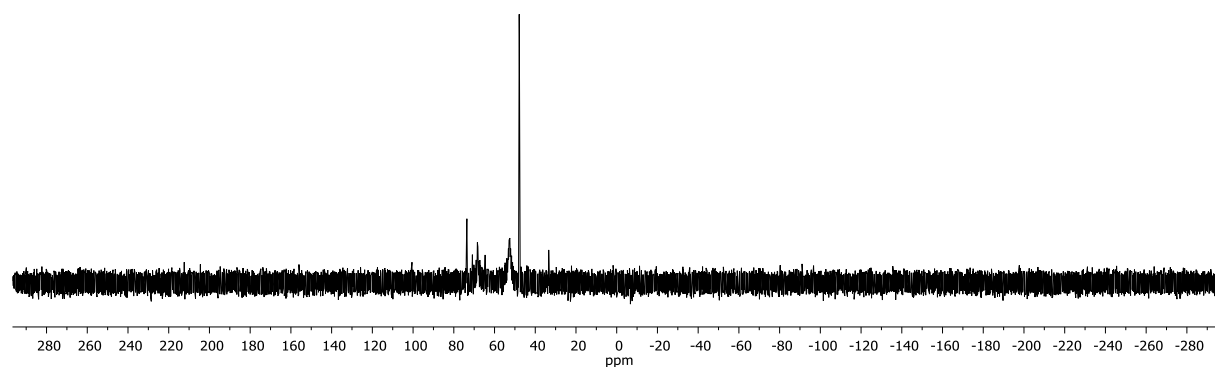

**Figure S33:** <sup>31</sup>P NMR spectrum (THF-*d*<sub>8</sub>, 300 K, 160 MHz) of the product mixture after refluxing (*n*Bu)<sub>3</sub>P under SF<sub>6</sub> atmosphere.

# Wavelength Screening

## a) Irradiation of $\text{Ph}_3\text{P}/\text{SF}_6$ with $\lambda = 310$ nm

In an NMR tube,  $\text{Ph}_3\text{P}$  (30 mg) was dissolved in THF (0.7 mL). The solution was pressurized with  $\text{SF}_6$  (2 bar) and irradiated with UV light ( $\lambda = 310$  nm) for 15 minutes.

$^{19}\text{F}$  NMR (THF, 376 MHz)  $\delta$  (ppm) = -40.8 (d,  $^1J_{\text{PF}} = 669.3$  Hz,  $\text{PF}_2\text{Ph}_3$ ), -46.1 (d,  $^1J_{\text{PF}} = 872.8$  Hz,  $\text{PF}_3\text{Ph}_2$ ), -82.5 (d,  $^1J_{\text{PF}} = 1017.3$  Hz,  $\text{PFPh}_3^+$ ).

$^{31}\text{P}$  NMR (THF, 160 MHz)  $\delta$  (ppm) = 101.4 (d,  $^1J_{\text{PF}} = 1017.3$  Hz,  $\text{PFPh}_3^+$ ), 42.3 (s,  $\text{PSPPh}_3$ ), 22.9 (s,  $\text{Ph}_4\text{P}^+$ ), -57.0 (t,  $^1J_{\text{PF}} = 669.3$  Hz,  $\text{PF}_2\text{Ph}_3$ ), -132.6 (q,  $^1J_{\text{PF}} = 872.8$  Hz,  $\text{PF}_3\text{Ph}_2$ ).

HRMS (ESI):  $m/z$  calculated for  $\text{Ph}_4\text{P}^+$  [ $\text{C}_{24}\text{H}_{20}\text{P}$ ] $^+$  (M) $^+$  339.12971, found: 339.12970.

HRMS (ESI):  $m/z$  calculated for  $\text{PFPh}_3^+[\text{C}_{18}\text{H}_{15}\text{FP}]^+$  (M) $^+$  281.08899, found: 281.08883.

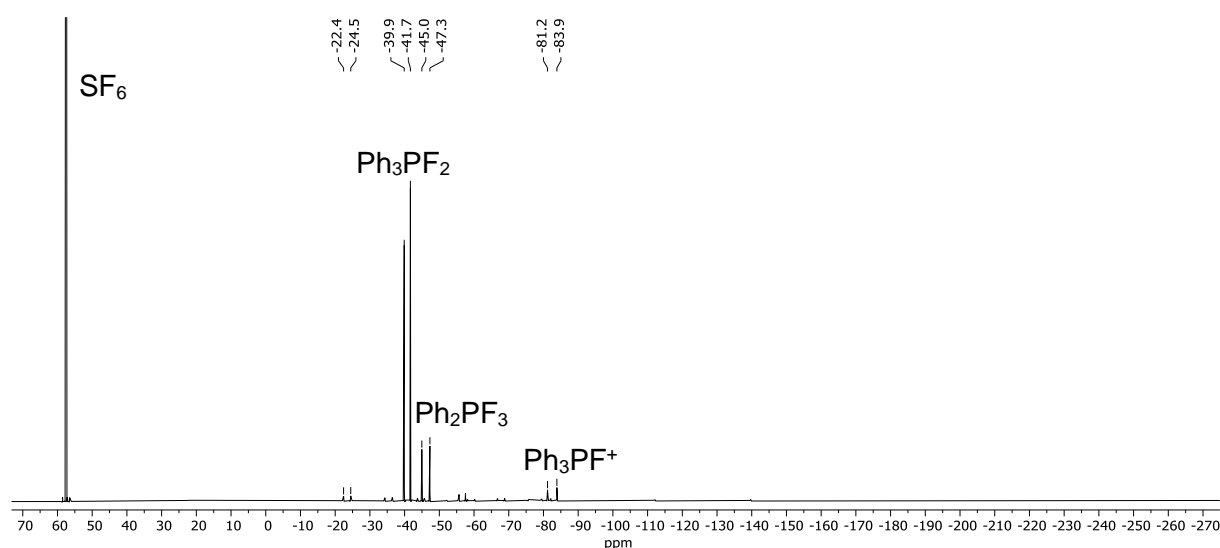

**Figure S34:**  $^{19}\text{F}$  NMR spectrum (THF, 300 K, 376 MHz) of the reaction mixture after irradiating with  $\lambda = 310$  nm.

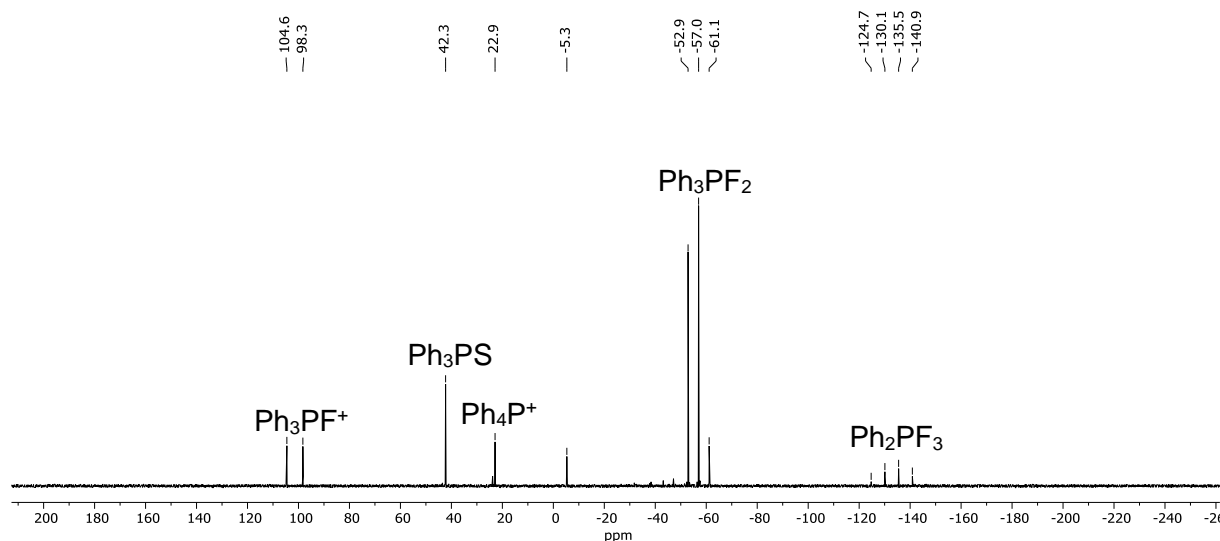

**Figure S35:**  $^{31}\text{P}$  NMR spectrum (THF, 300 K, 160 MHz) of the reaction mixture after irradiating with  $\lambda = 310$  nm.

**b) Irradiation of Ph<sub>3</sub>P/SF<sub>6</sub> with  $\lambda = 365$  nm**

In an NMR tube, Ph<sub>3</sub>P (30 mg) was dissolved in THF (0.7 mL). The solution was pressurized with SF<sub>6</sub> (2 bar) and irradiated with UV light ( $\lambda = 365$  nm). The reaction progress was monitored by <sup>31</sup>P NMR spectroscopy. After 6 h, the reaction reached full conversion to a 3:1 mixture of triphenyldifluorophosphorane and triphenylphosphine sulfide.

**c) Irradiation of Ph<sub>3</sub>P/SF<sub>6</sub> with  $\lambda = 405$  nm**

In an NMR tube, Ph<sub>3</sub>P (30 mg) was dissolved in THF (0.7 mL). The solution was pressurized with SF<sub>6</sub> (2 bar) and irradiated with UV light ( $\lambda = 405$  nm). The reaction progress was monitored by <sup>31</sup>P NMR spectroscopy. After 12 h, the reaction reached full conversion to a 3:1 mixture of triphenyldifluorophosphorane and triphenylphosphine sulfide.

**d) Irradiation of Ph<sub>3</sub>P/SF<sub>6</sub> with  $\lambda = 450$  nm**

In an NMR tube, Ph<sub>3</sub>P (30 mg) was dissolved in THF (0.7 mL). The solution was pressurized with SF<sub>6</sub> (2 bar) and irradiated with blue light ( $\lambda = 450$  nm) for 24 h. The <sup>31</sup>P NMR spectrum of the reaction mixture was identical to that of the starting material indicating no reaction between Ph<sub>3</sub>P and SF<sub>6</sub>.

## Synthesis of *TPP-Fluor*

A flat-bottomed glass vessel with a three-way valve was charged with solid  $\text{Ph}_3\text{P}$  (1.5 g, 5.7 mmol). The vessel was connected to a U-tube filled with silicone oil, which was connected to a gas-tight syringe (Fig. S36). The atmosphere in the system was changed to  $\text{SF}_6$  using the three-way valve. The reaction chamber was heated to 80 °C and it was subsequently irradiated with light at 365 nm. After irradiation for 7.7 h, the consumption of  $\text{SF}_6$  during the experiment ( $\approx 33$  mL) matches the theoretical calculated volume for full conversion (33.06 mL). In a second experiment, the yield was determined gravimetrically using 10.00 g of  $\text{Ph}_3\text{P}$ . The  $^{31}\text{P}$  NMR spectrum of the dissolved solid indicates quantitative consumption of  $\text{Ph}_3\text{P}$ . The weight increase (1.296 g) corresponds to 93% yield. A time-lapse of the reaction can be found as supplementary material.

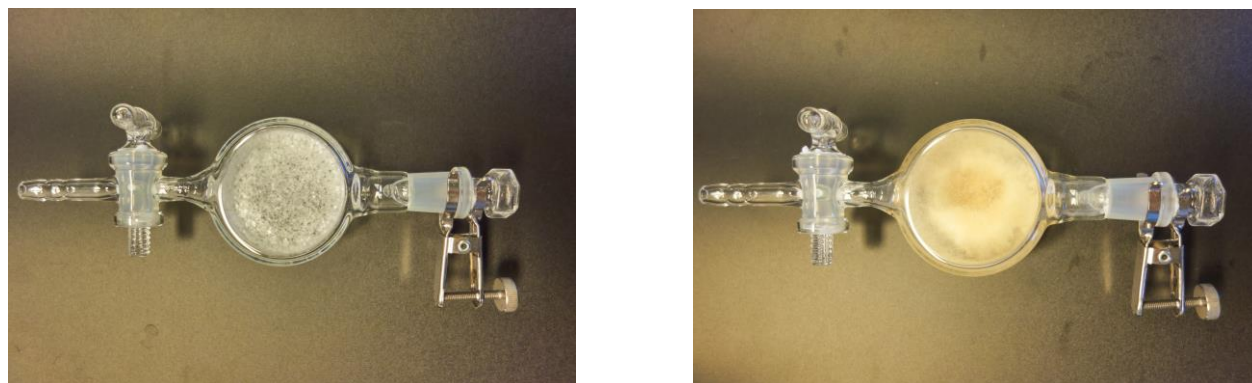

**Figure S36:** Gas vessel charged with  $\text{Ph}_3\text{P}$  before (left) and after irradiation (right).

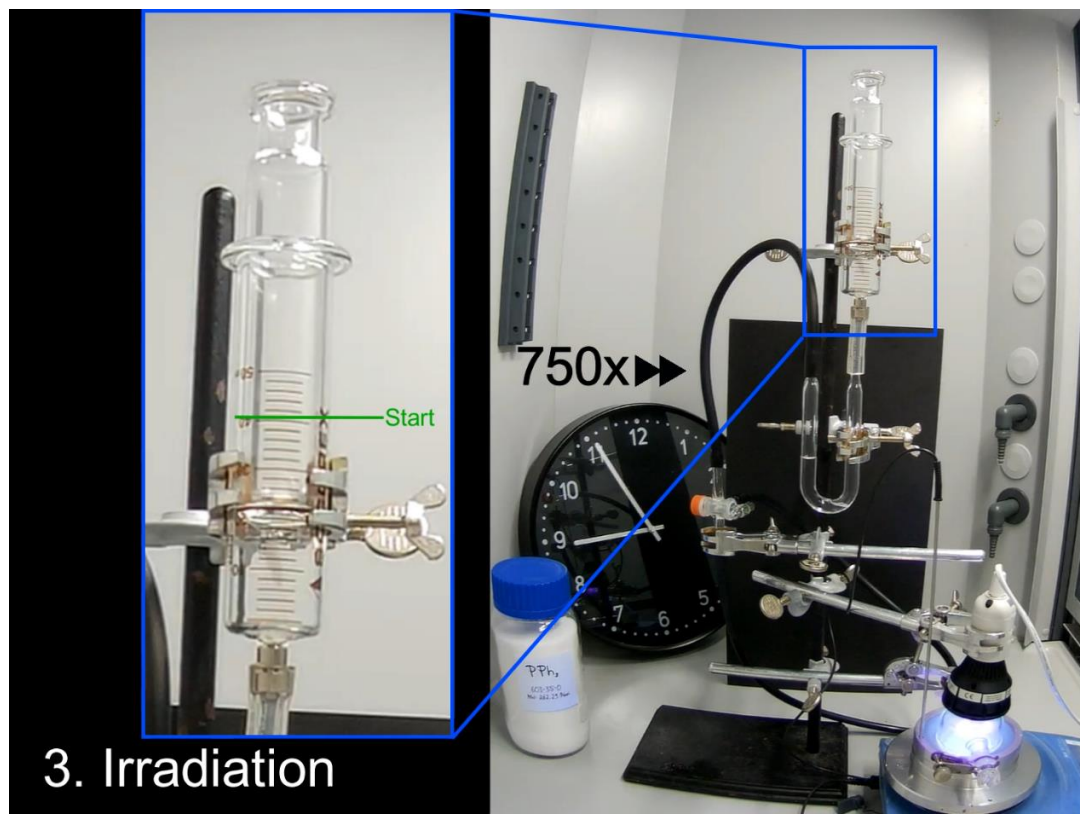

**Figure S37:** Setup for the solvent-free reaction of  $\text{Ph}_3\text{P}$  with  $\text{SF}_6$ . Paraffin oil was used to lubricate the plunger of the syringe to make it gas tight and smooth running.

## Large-Scale Synthesis of *TPP-Fluor*

Large-scale synthesis of *TPP-Fluor* was performed in a flat-bottomed glass vessel containing 100 g  $\text{Ph}_3\text{P}$ . The vessel was irradiated from below with an LED array and heated exclusively by the heat of the LEDs. The pressure in the vessel was kept constant at 1 bar.

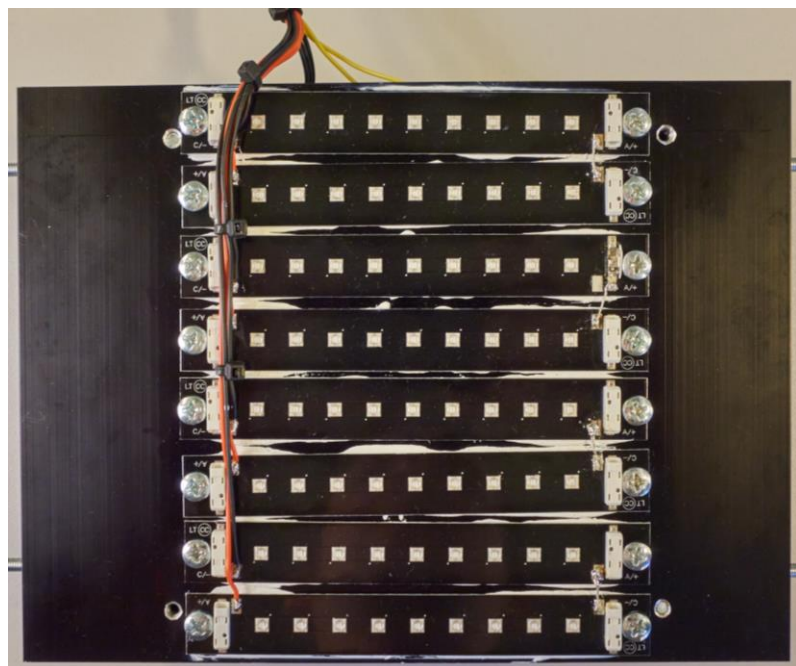

**Figure S38:** LED array for large-scale synthesis of *TPP-Fluor*.

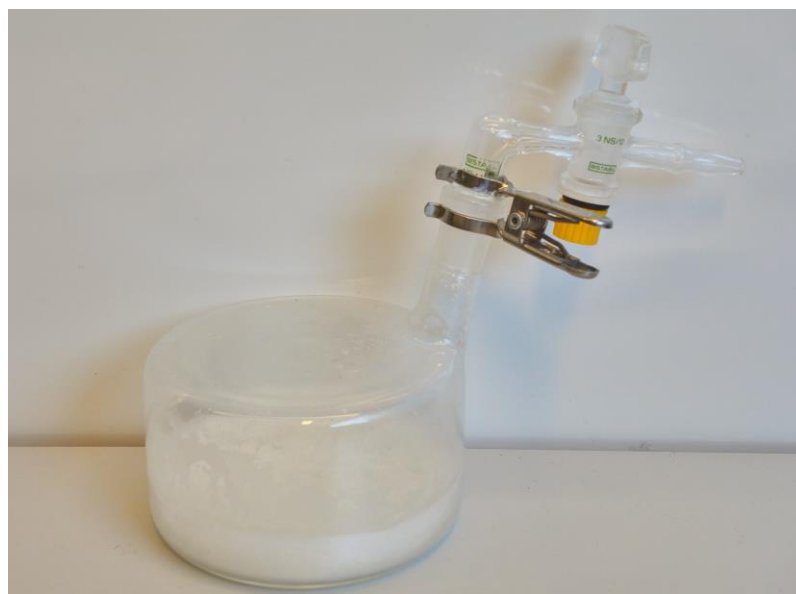

**Figure S39:** Flat-bottomed glass vessel charged with 100 g  $\text{Ph}_3\text{P}$ .



# Photochemical Reaction of SF<sub>6</sub> with Alkyl Phosphines

(*n*Bu)<sub>3</sub>P (30 mg, 0.15 mmol, 1 eq.) and a photosensitizer (**I**: acetophenone, **II**: benzophenone) were dissolved in THF-*d*<sub>8</sub> (0.7 mL). The solution was pressurized with SF<sub>6</sub> (2 bar) and it was irradiated with light at 365 nm for the indicated time. The reaction progress was monitored by <sup>31</sup>P NMR spectroscopy.

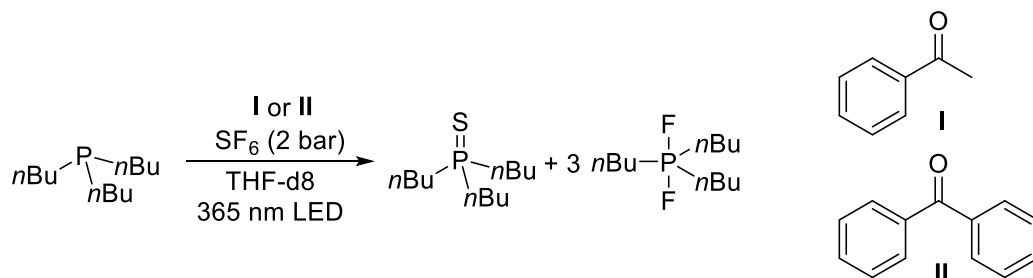

**Table S1:** Photochemical Reaction of (*n*Bu)<sub>3</sub>P with SF<sub>6</sub> using photosensitizers.

| Photosensitizer  | Irradiation Time | Conversion (%)* |
|------------------|------------------|-----------------|
| none             | 24 h             | 0               |
| 0.2 eq. <b>I</b> | 24 h             | 33              |
| 0.2 eq. <b>I</b> | 72 h             | 91              |
| 1 eq. <b>I</b>   | 24 h             | 99              |
| 1 eq. <b>II</b>  | 24 h             | 80              |

\*<sup>31</sup>P NMR yield by quantitative NMR spectroscopy

<sup>19</sup>F NMR (THF-*d*<sub>8</sub>, 376 MHz) δ (ppm) = -35.2 (dt, <sup>1</sup>J<sub>PF</sub> = 583.9 Hz, <sup>3</sup>J<sub>FH</sub> = 11.2 Hz, (*n*Bu)<sub>3</sub>PF<sub>2</sub>).

<sup>31</sup>P NMR (THF-*d*<sub>8</sub>, 162 MHz) δ (ppm) = 47.3 (s, (*n*Bu)<sub>3</sub>PS), -14.9 (t, <sup>1</sup>J<sub>PF</sub> = 583.9 Hz, (*n*Bu)<sub>3</sub>PPF<sub>2</sub>).

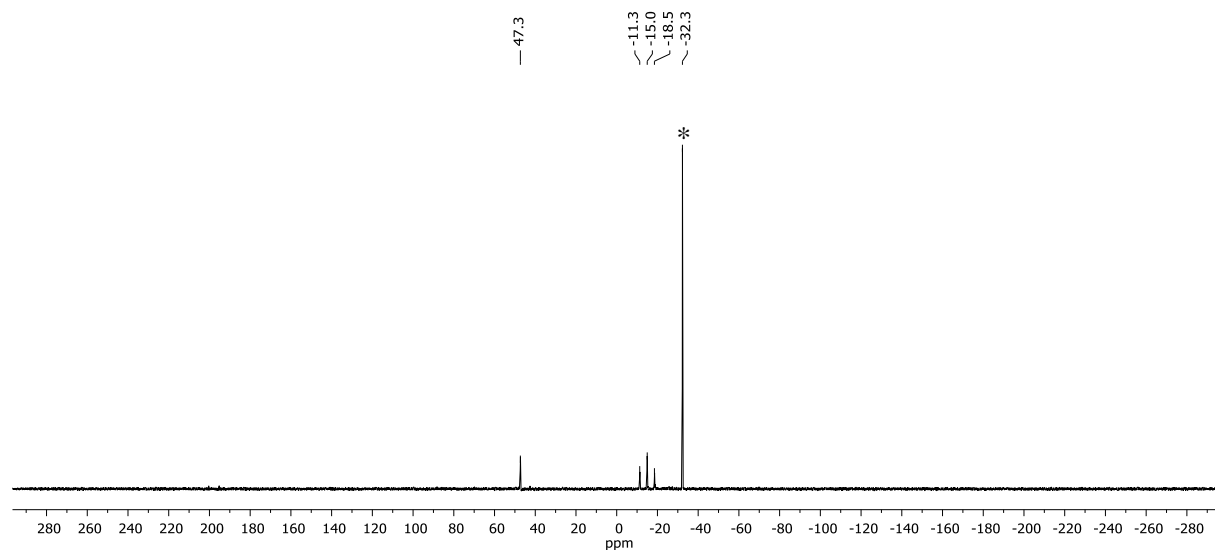

**Figure S40:** <sup>31</sup>P NMR spectrum (THF-*d*<sub>8</sub>, 300 K, 160 MHz) using 0.2 eq. acetophenone and irradiating for 24 h. \* (*n*Bu)<sub>3</sub>P

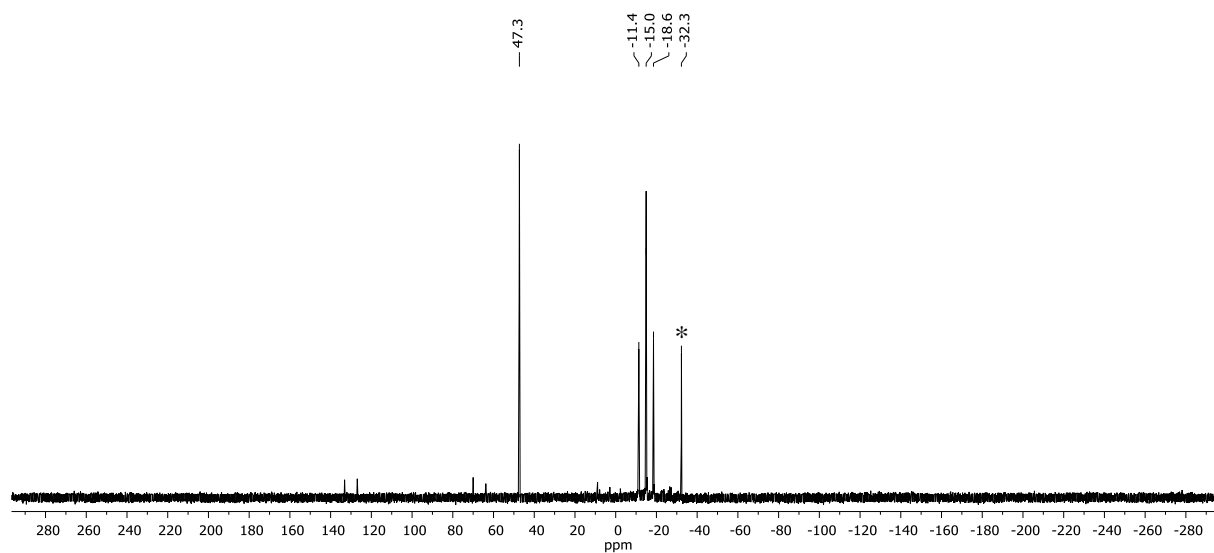

**Figure S41:**  $^{31}\text{P}$  NMR spectrum (THF- $d_8$ , 300 K, 160 MHz) using 0.2 eq. acetophenone and irradiating for 72 h. \*  $(n\text{Bu})_3\text{P}$

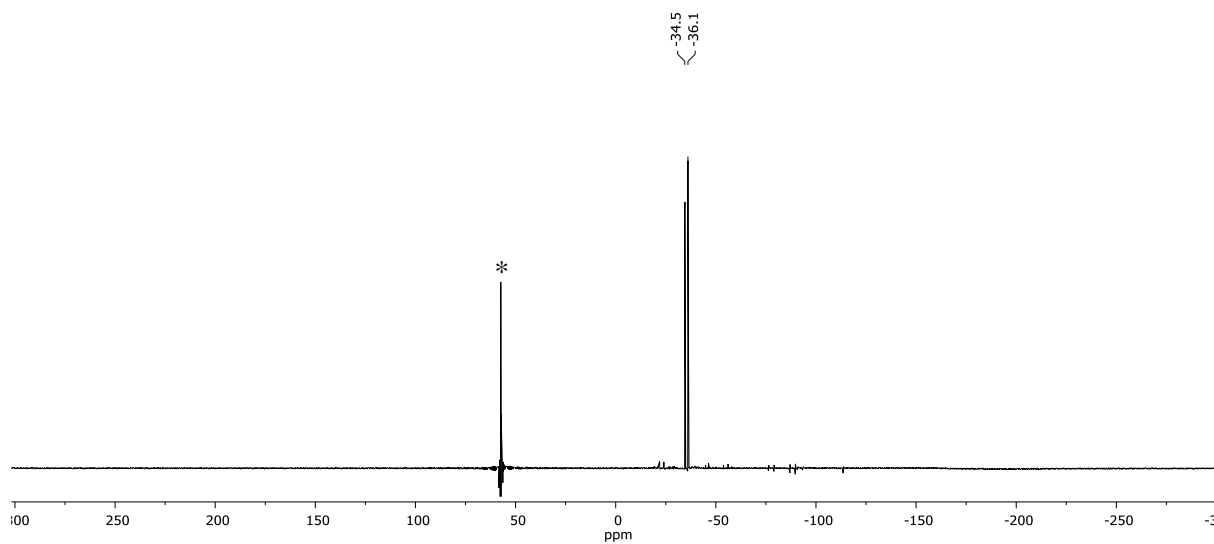

**Figure S42:**  $^{19}\text{F}$  NMR spectrum (THF- $d_8$ , 300 K, 376 MHz) using 1 eq. acetophenone and irradiating for 24 h. \*  $\text{SF}_6$

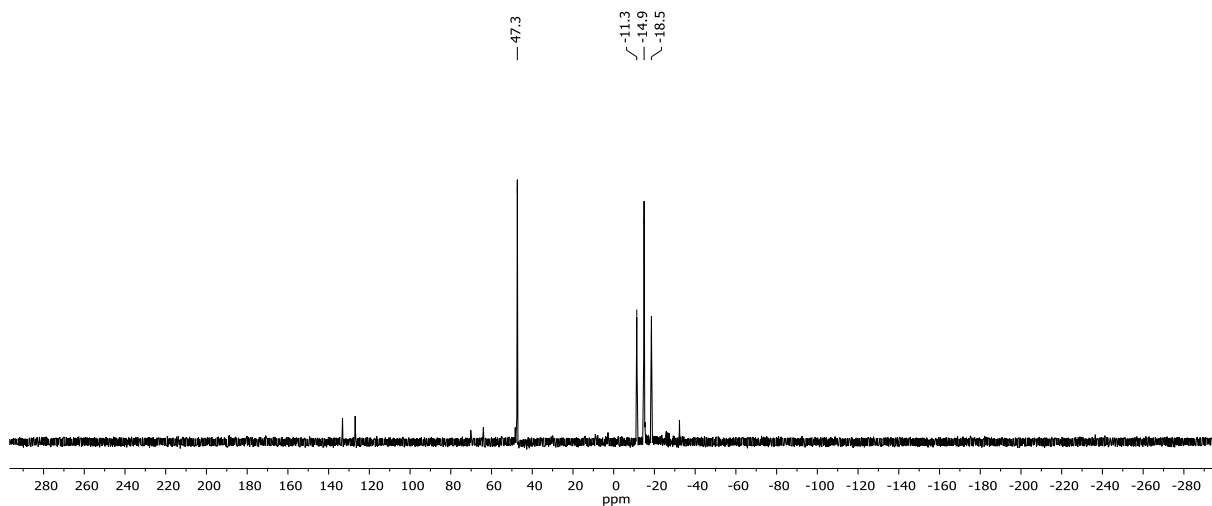

**Figure S43:** <sup>31</sup>P NMR spectrum (THF-*d*<sub>8</sub>, 300 K, 160 MHz) using 1 eq. acetophenone and irradiating for 24 h.

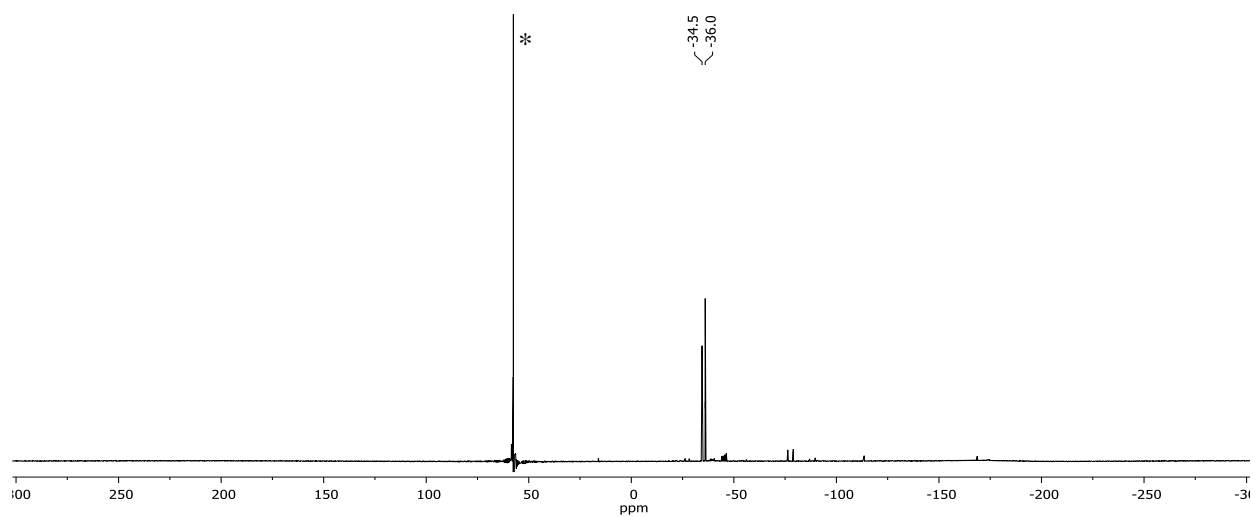

**Figure S44:** <sup>19</sup>F NMR spectrum (THF-*d*<sub>8</sub>, 300 K, 376 MHz) using 1 eq. benzophenone and irradiating for 24 h. \* SF<sub>6</sub>

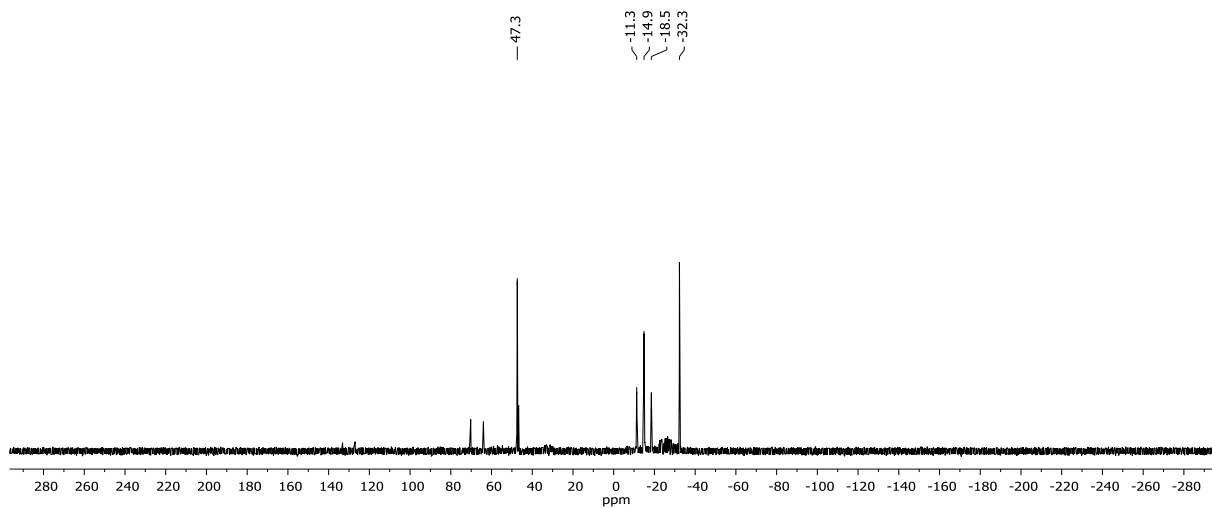

**Figure S45:**  $^{31}\text{P}$  NMR spectrum (THF- $d_8$ , 300 K, 160 MHz) using 1 eq. benzophenone and irradiating for 24 h.

## TPP-Fluor as Fluorinating Agent

**Deoxyfluorination of 1-hexanol:** TPP-Fluor (100 mg, 0.08 mmol, 1 eq.) and 1-hexanol (10  $\mu\text{L}$ , 0.08 mmol, 1 eq.) were dissolved in MeCN (0.5 mL) in a Teflon sealed NMR tube containing a Teflon inlay to avoid glass contact of the solution. The tube was heated at 170  $^{\circ}\text{C}$  for 8 h.  $\alpha,\alpha,\alpha$ -trifluorotoluene (10  $\mu\text{L}$ ) was added afterwards as  $^{19}\text{F}$  NMR standard. The quantitative  $^{19}\text{F}$  NMR spectrum shows the resonance of 1-fluorohexane at  $\delta = -217.5$  ppm with a yield of 22%.

**General procedure for the deoxyfluorination of carboxylic acids:** TPP-Fluor (100 mg, 0.08 mmol, 1 eq.), the carboxylic acid (0.08 mmol, 1 eq.) and  $\alpha,\alpha,\alpha$ -trifluorotoluene (0.066 mmol) as internal  $^{19}\text{F}$  NMR standard were dissolved in DCM (0.7 mL) in a Teflon sealed NMR tube. The reaction mixture was heated at 80  $^{\circ}\text{C}$  for 16 h and was then analysed by quantitative  $^{19}\text{F}$  NMR spectroscopy. In addition to the sharp resonance of the acyl fluoride, the  $^{19}\text{F}$  NMR spectrum shows a broad signal at  $\delta = -142.6$  ppm which is in the typical range of HF/FHF.

**Table S2:** Deoxyfluorination of carboxylic acids using TPP-Fluor.

| Acyl fluoride | $^{19}\text{F}$ NMR Shift of Acyl Fluoride [ppm] | Yield (%) |
|---------------|--------------------------------------------------|-----------|
| <b>17</b>     | 43.7                                             | 88        |
| <b>18</b>     | 17.5                                             | 6         |
| <b>19</b>     | 24.4                                             | 85        |
| <b>20</b>     | 54.8                                             | 88        |
| <b>21</b>     | 16.8                                             | 20        |
| <b>22</b>     | 13.3                                             | 62        |
| <b>23</b>     | 10.4                                             | 85        |
| <b>24</b>     | -                                                | -         |
| <b>25</b>     | 17.4                                             | 4         |
| <b>26</b>     | 17.8                                             | 1         |

Example: Deoxyfluorination of lauric acid using TPP-Fluor

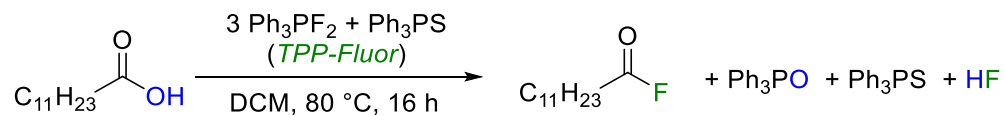

The deoxyfluorination was carried out according to the general procedure. In the  $^{19}\text{F}$  NMR spectrum of the reaction mixture (*vide infra*), the ratio of the internal standard to acyl fluoride equals 10.00 / 3.63. Considering that the standard contains 3 fluoride atoms the yield equals to 88%.

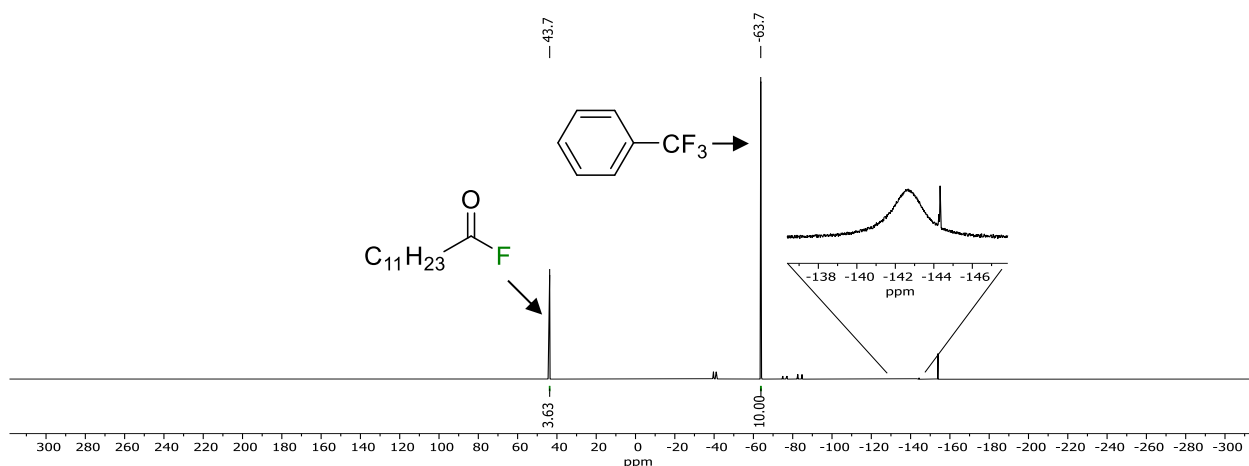

**Figure S46:**  $^{19}\text{F}$  qNMR spectrum (DCM,  $D_1 = 35$  sec, aq. Time = 0.44 sec, zg90) of the deoxyfluorination of lauric acid.

**Synthesis of  $\text{PF}_6$  salts using TPP-Fluor:**

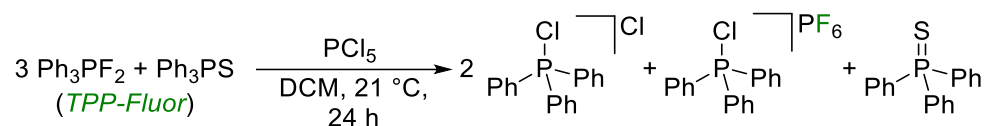

TPP-Fluor (87 mg) and  $\text{PCl}_5$  (15 mg, 0.072 mmol) were dissolved in DCM (0.7 mL) and stirred for 24 h at ambient temperature to give two equivalents chlorophosphonium chloride and one equivalent chlorophosphonium hexafluorophosphate in 99% yield.

$^{19}\text{F}$  NMR ( $\text{CD}_2\text{Cl}_2$ , 376 MHz)  $\delta$  (ppm) = -73.1 (d,  $^1J_{\text{PF}} = 711.0$  Hz,  $\text{PF}_6$ ).

$^{31}\text{P}$  NMR ( $\text{CD}_2\text{Cl}_2$ , 160 MHz)  $\delta$  (ppm) = 60.2 (s,  $\text{Ph}_3\text{PCl}_2$ ), 43.0 (s,  $\text{Ph}_3\text{PS}$ ), -144.5 (sept,  $^1J_{\text{PF}} = 711.0$  Hz,  $\text{PF}_6$ ).

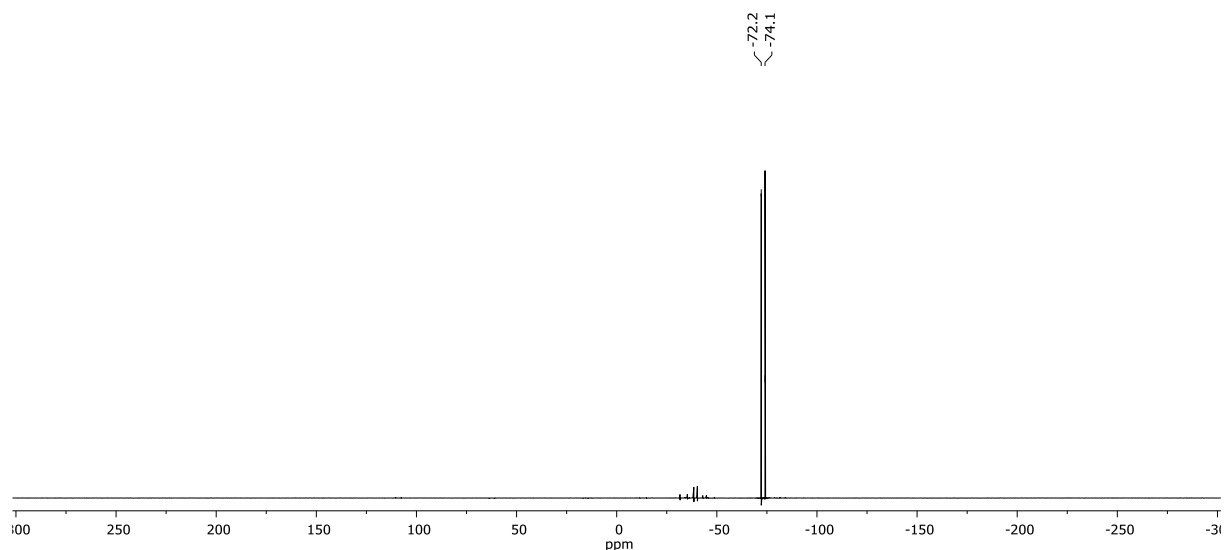

**Figure S47:**  $^{19}\text{F}$  NMR spectrum ( $\text{CD}_2\text{Cl}_2$ , 300 K, 376 MHz) of the reaction mixture.

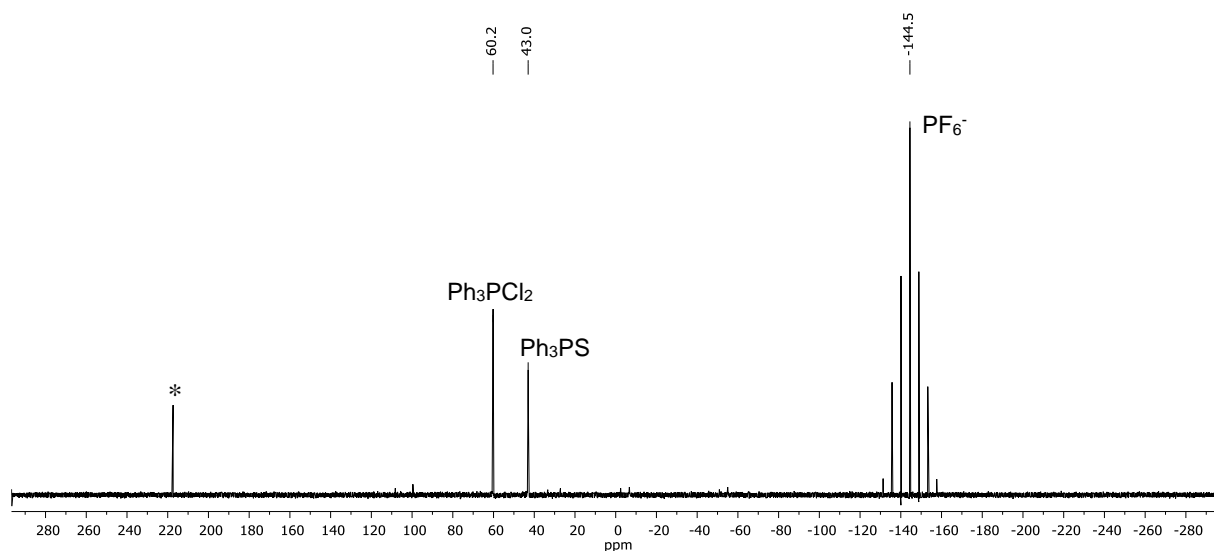

**Figure S48:**  $^{31}\text{P}$  NMR spectrum ( $\text{CD}_2\text{Cl}_2$ , 300 K, 160 MHz) of the reaction mixture. \*  $\text{PCl}_3$  (<1%)

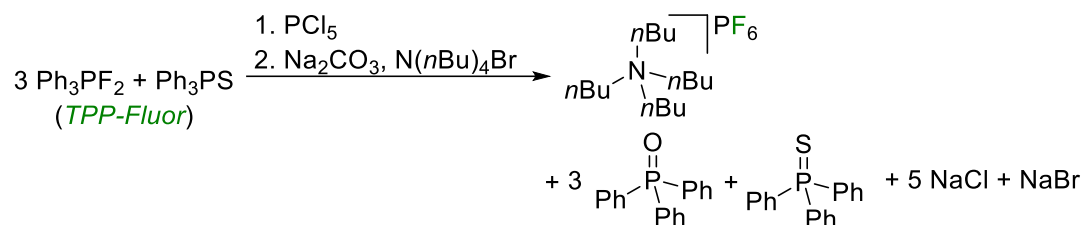

*TPP-Fluor* (500 mg) and  $\text{PCl}_5$  (87 mg, 0.42 mmol) were dissolved in DCM (20 mL) and stirred for 16 h at ambient temperature. The reaction mixture was quenched with water (5 mL) and the aqueous layer was made basic using sat.  $\text{Na}_2\text{CO}_3$ .  $\text{N}(n\text{Bu})_4\text{Br}$  (135 mg, 0.42 mmol) was added and the emulsion was vigorously stirred. The organic layer was separated, washed with water (3 x 5 mL) and dried over  $\text{Na}_2\text{SO}_4$ . After partial removal of the solvent under reduced pressure, the product was crystallized by slow diffusion of  $\text{Et}_2\text{O}$  into a saturated DCM solution of the crude product. Yield: 128 mg (0.33 mmol, 79%).

$^1\text{H}$  NMR ( $\text{MeCN-}d_3$ , 400 MHz)  $\delta$  (ppm) = 3.08 (m, 8H,  $\text{NCH}_2$ ), 1.60 (m, 8H,  $\text{NCH}_2\text{CH}_2$ ), 1.35 (m, 8H,  $\text{CH}_2\text{CH}_3$ ), 0.97 (t,  $^3J_{\text{HH}} = 7.3$  Hz, 12H,  $\text{CH}_3$ ).

$^{13}\text{C}\{^1\text{H}\}$  NMR ( $\text{MeCN-}d_3$ , 100 MHz)  $\delta$  (ppm) = 59.4 ( $\text{NCH}_2$ ), 24.3 ( $\text{NCH}_2\text{CH}_2$ ), 20.3 ( $\text{CH}_2\text{CH}_3$ ), 13.7 ( $\text{CH}_3$ ).

$^{19}\text{F}$  NMR ( $\text{MeCN-}d_3$ , 376 MHz)  $\delta$  (ppm) = -72.9 (d,  $^1J_{\text{PF}} = 706.2$  Hz,  $\text{PF}_6$ ).

$^{31}\text{P}$  NMR ( $\text{MeCN-}d_3$ , 160 MHz)  $\delta$  (ppm) = -144.6 (sept,  $^1J_{\text{PF}} = 706.2$  Hz,  $\text{PF}_6$ ).

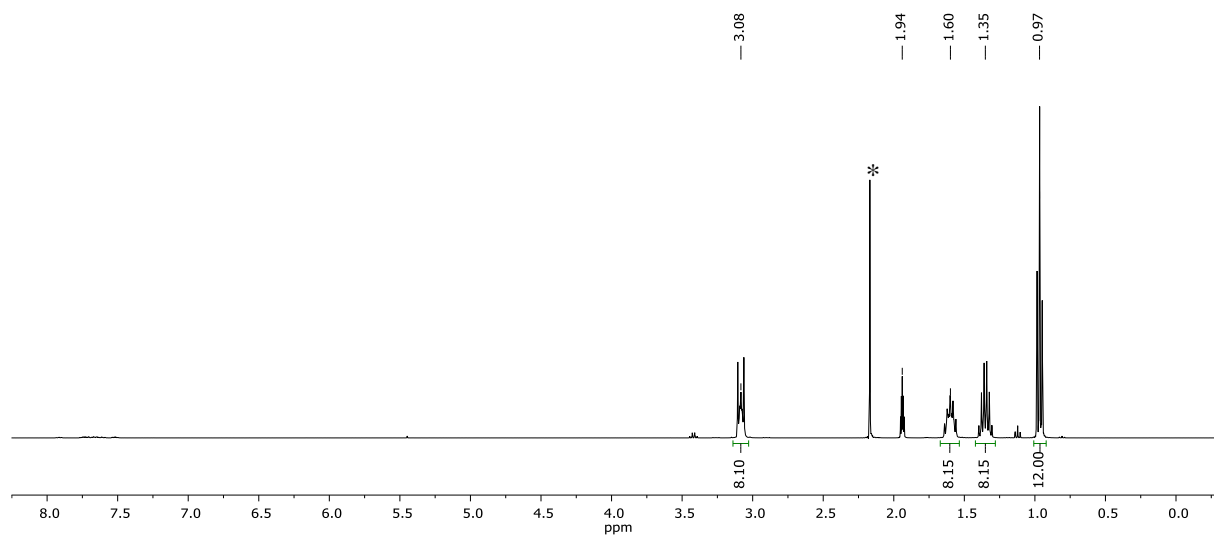

**Figure S49:**  $^1\text{H}$  NMR spectrum ( $\text{MeCN-}d_3$ , 300 K, 400 MHz) of the isolated  $\text{N}(n\text{Bu})_4\text{PF}_6$ . \* water

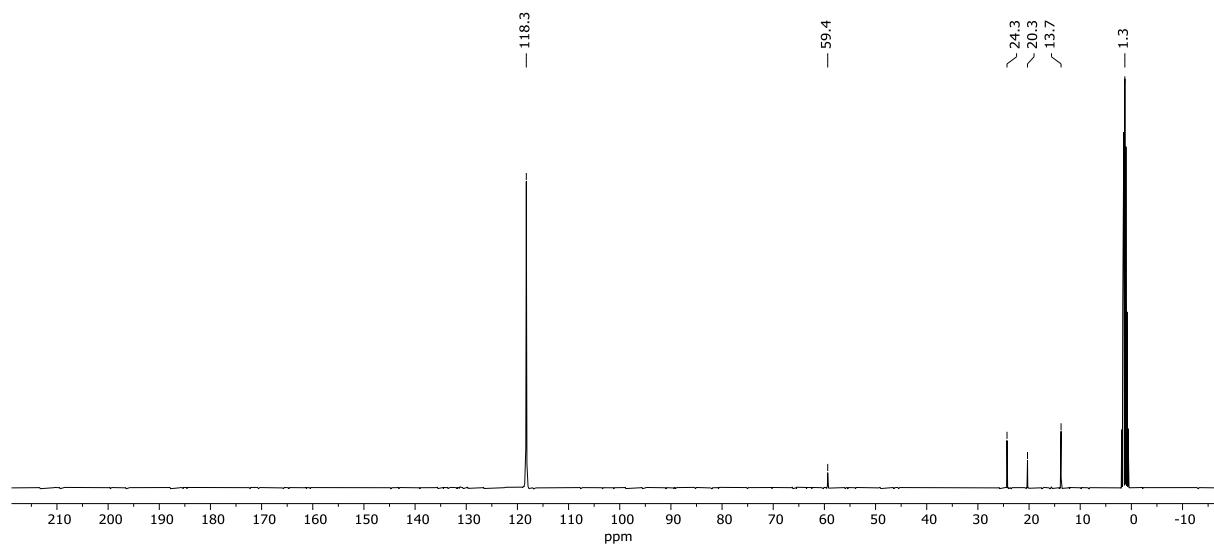

**Figure S50:**  $^{13}\text{C}\{^1\text{H}\}$  NMR spectrum ( $\text{MeCN-}d_3$ , 300 K, 100 MHz) of the isolated  $\text{N}(n\text{Bu})_4\text{PF}_6$ .

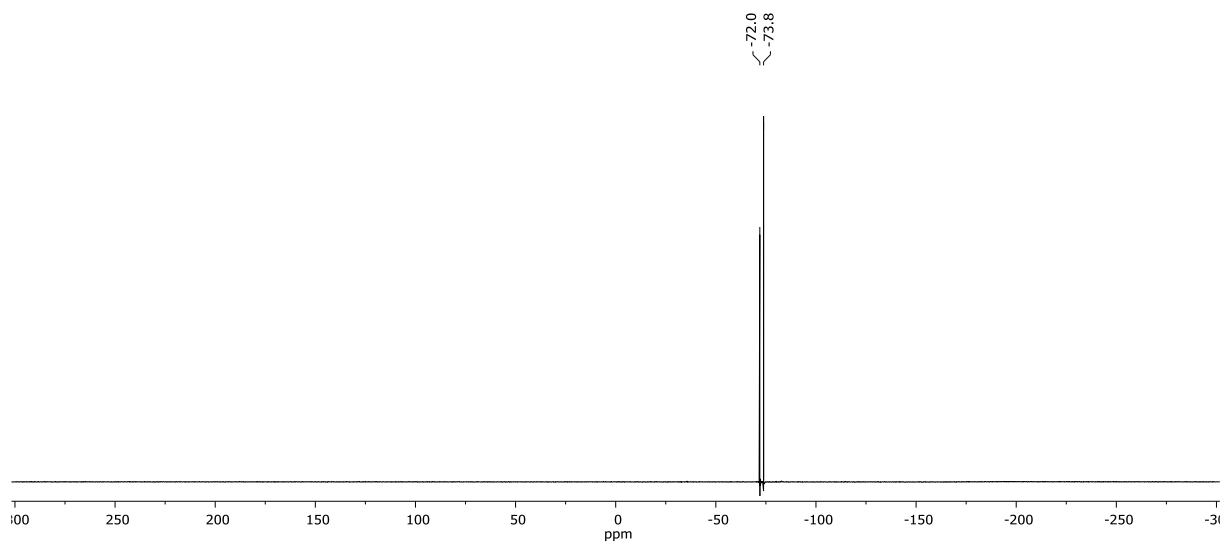

**Figure S51:**  $^{19}\text{F}$  NMR spectrum ( $\text{MeCN-}d_3$ , 300 K, 376 MHz) of the isolated  $\text{N}(n\text{Bu})_4\text{PF}_6$ .

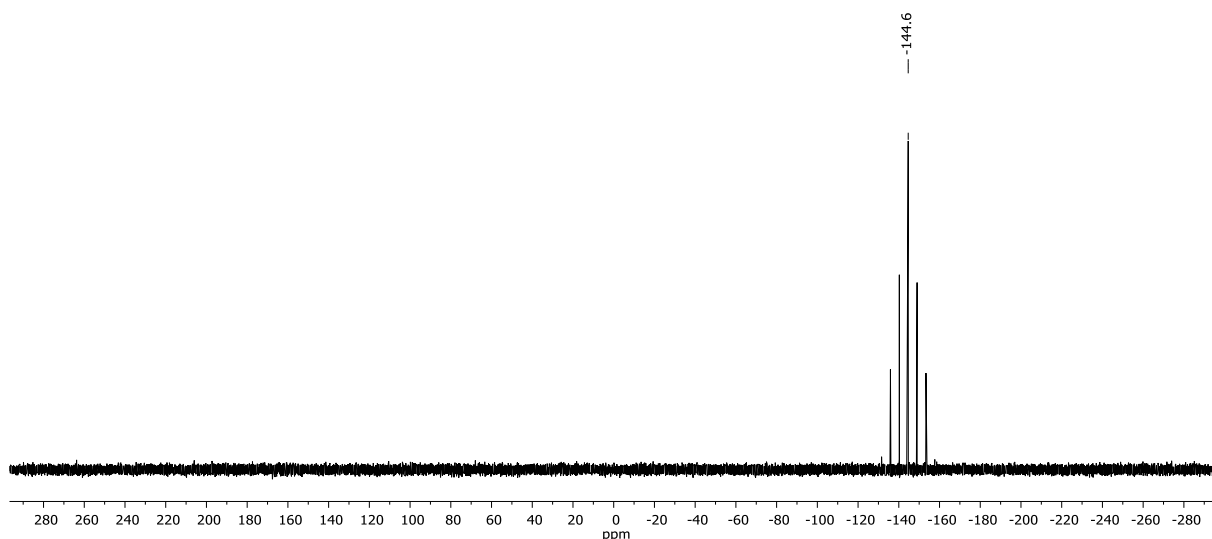

**Figure S52:**  $^{31}\text{P}$  NMR spectrum (MeCN- $d_3$ , 300 K, 160 MHz) of the isolated  $\text{N}(n\text{Bu})_4\text{PF}_6$ .

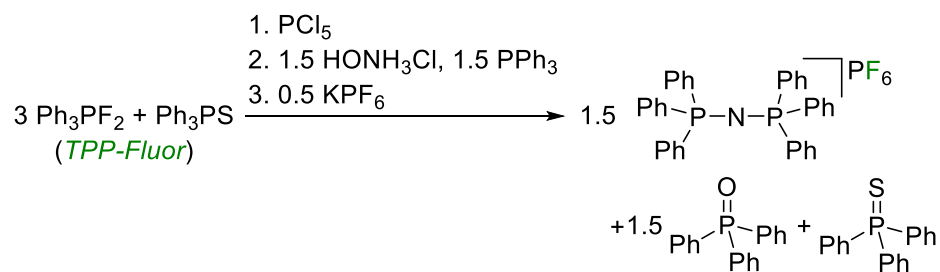

TPP-Fluor (500 mg) and  $\text{PCl}_5$  (87 mg, 0.42 mmol, 1 eq.) were dissolved in DCM (20 mL) and stirred for 16 h at ambient temperature. Hydroxylammonium chloride (44 mg, 0.63 mmol, 1.5 eq.) and triphenyl phosphine (165 mg, 0.63 mmol, 1.5 eq.) were added and the reaction mixture was heated in a sealed Teflon flask at 120 °C for 24 h. Water (5 mL) and  $\text{KPF}_6$  (39 mg, 0.21 mmol, 0.5 eq.) were added and the emulsion was vigorously stirred. The organic layer was separated, washed with water (3 x 5 mL) and dried over  $\text{Na}_2\text{SO}_4$ . After partial removal of the solvent under reduced pressure, the product was crystallized by slow diffusion of  $\text{Et}_2\text{O}$  into a saturated DCM solution of the crude product. Yield: 203 mg (0.35 mmol, 84%).

$^1\text{H}$  NMR ( $\text{CDCl}_3$ , 400 MHz)  $\delta$  (ppm) = 7.65 (m, 6H, 4-H), 7.47 (m, 24H, 2-H, 3-H).

$^{13}\text{C}\{^1\text{H}\}$  NMR ( $\text{CDCl}_3$ , 100 MHz)  $\delta$  (ppm) = 134.0 (s, Ar-C), 132.2 (m, Ar-C), 129.7 (m, Ar-C), 127.1 (dd,  $^1J_{\text{PC}} = 108.0$ ,  $^3J_{\text{PC}} = 1.9$  Hz, 1-C).

$^{19}\text{F}$  NMR ( $\text{CDCl}_3$ , 376 MHz)  $\delta$  (ppm) = -73.9 (d,  $^1J_{\text{PF}} = 711.3$  Hz,  $\text{PF}_6$ ).

$^{31}\text{P}$  NMR ( $\text{CDCl}_3$ , 160 MHz)  $\delta$  (ppm) = 21.2 (s,  $[\text{PPN}]^+$ ) -144.8 (sept,  $^1J_{\text{PF}} = 711.3$  Hz,  $\text{PF}_6$ ).



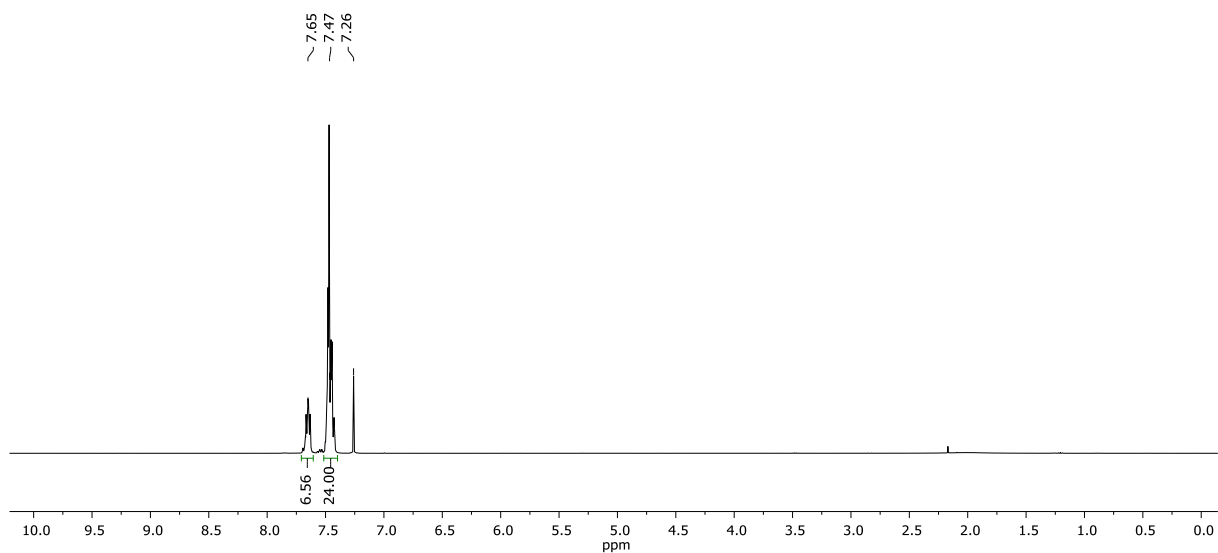

**Figure S53:**  $^1\text{H}$  NMR spectrum ( $\text{CDCl}_3$ , 300 K, 400 MHz) of the isolated (PPN) $\text{PF}_6$ .

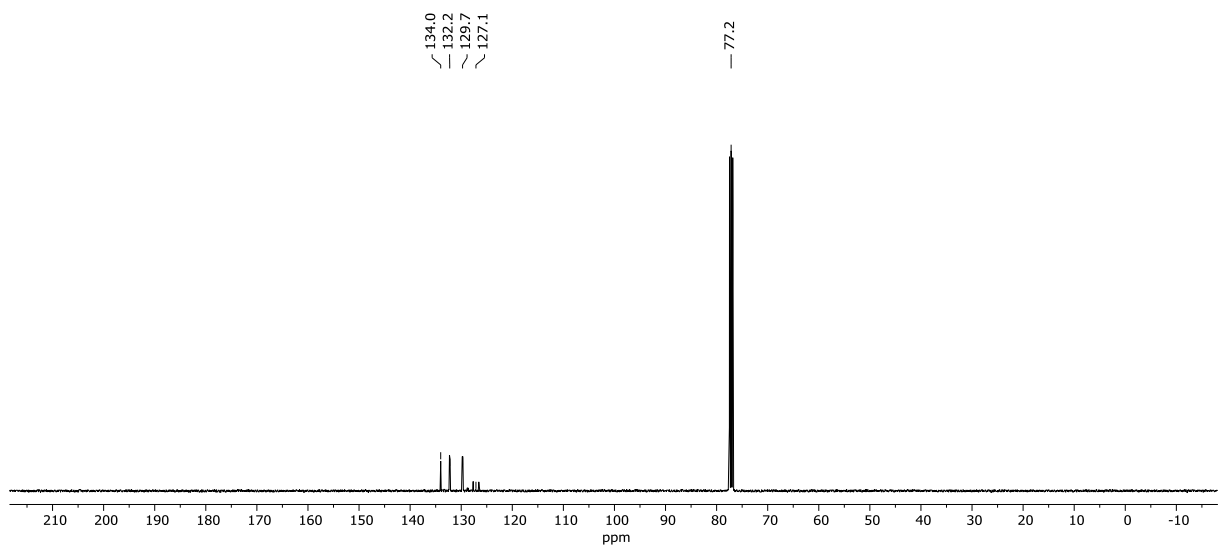

**Figure S54:**  $^{13}\text{C}\{^1\text{H}\}$  NMR spectrum ( $\text{CDCl}_3$ , 300 K, 100 MHz) of the isolated (PPN) $\text{PF}_6$ .

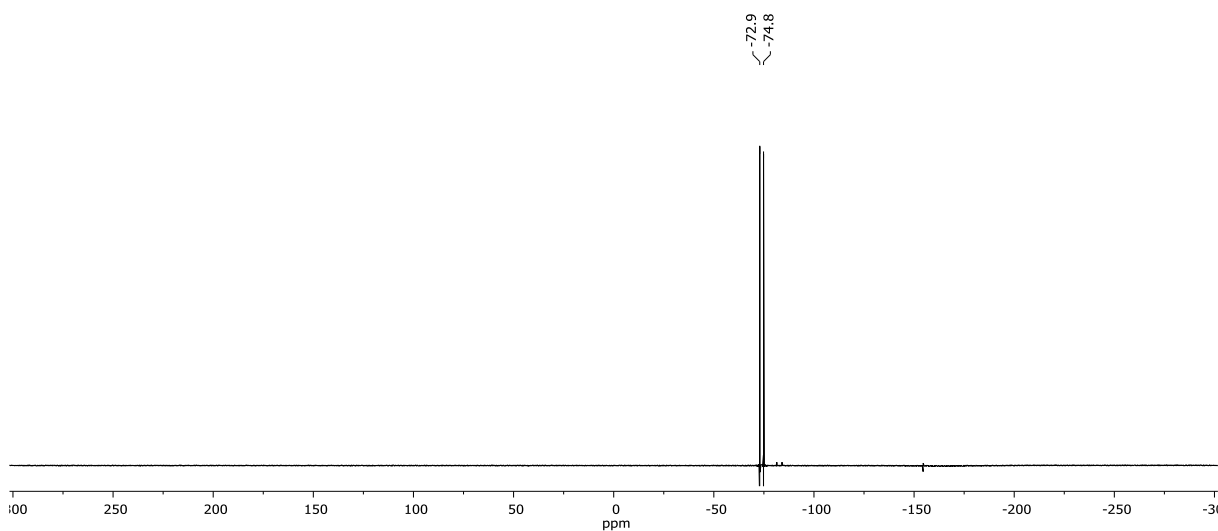

**Figure S55:**  $^{19}\text{F}$  NMR spectrum ( $\text{CDCl}_3$ , 300 K, 376 MHz) of the isolated (PPN) $\text{PF}_6$ .

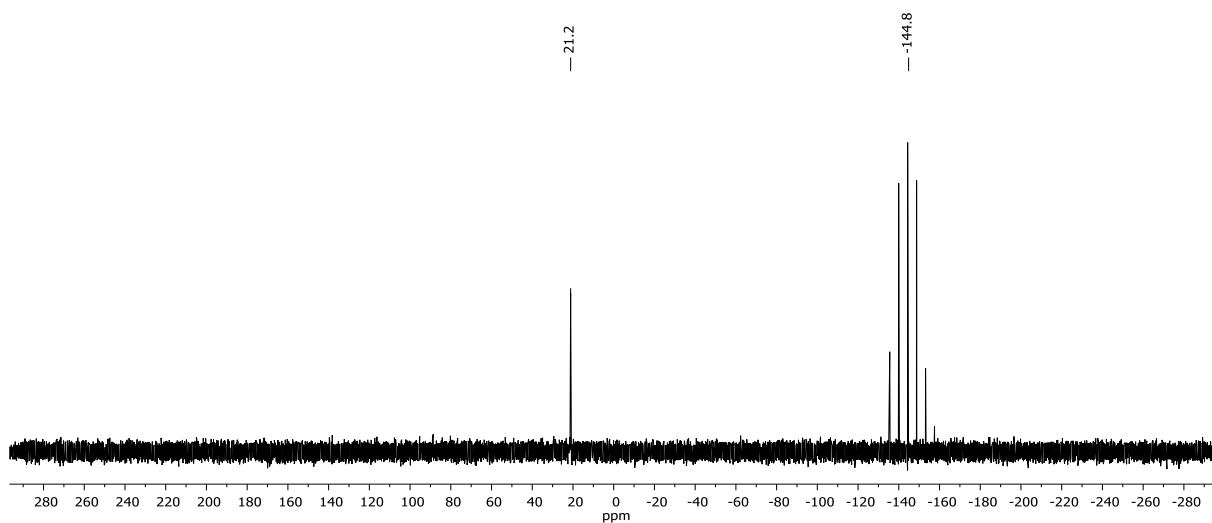

**Figure S56:**  $^{31}\text{P}$  NMR spectrum ( $\text{CDCl}_3$ , 300 K, 160 MHz) of the isolated  $(\text{PPN})\text{PF}_6$ .

## UV-vis spectroscopy

All spectra were recorded in a gas-tight quartz cuvette with a concentration of  $c = 3.8 \times 10^{-5}$  M in THF.

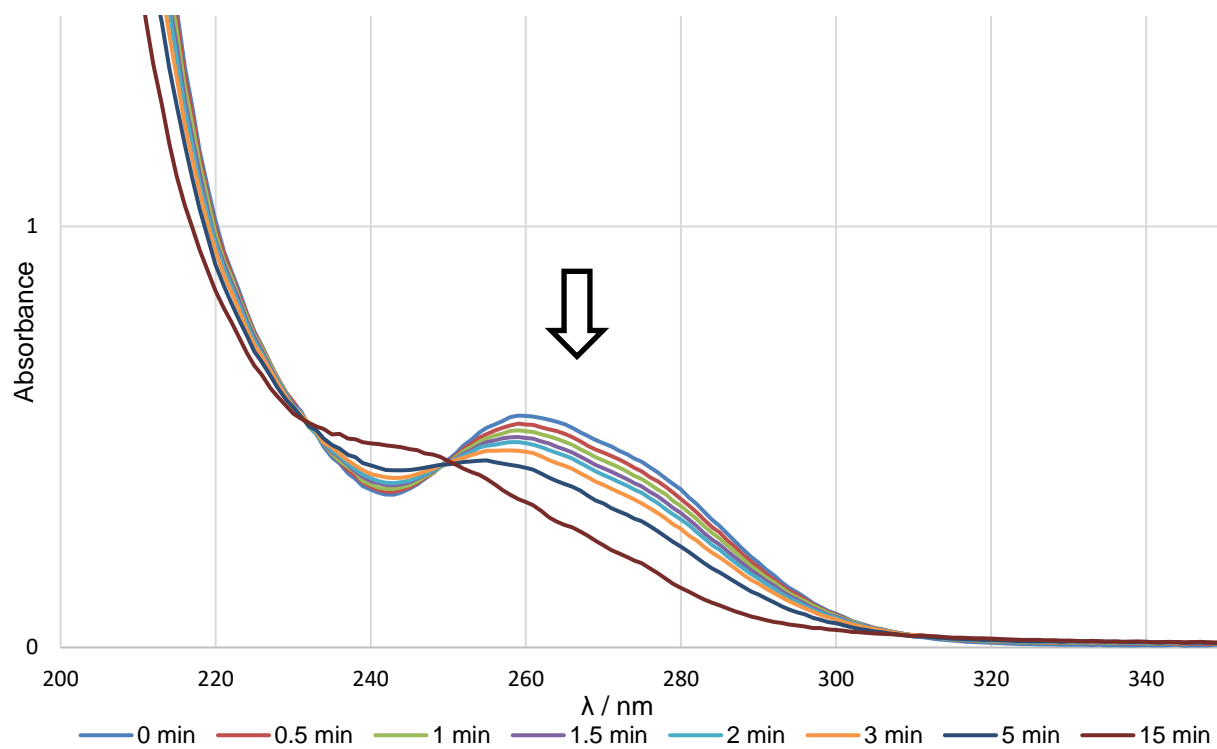

**Figure S57:** UV-vis spectra of  $\text{Ph}_3\text{P}$  after irradiation with  $\lambda = 310$  nm as long as indicated.

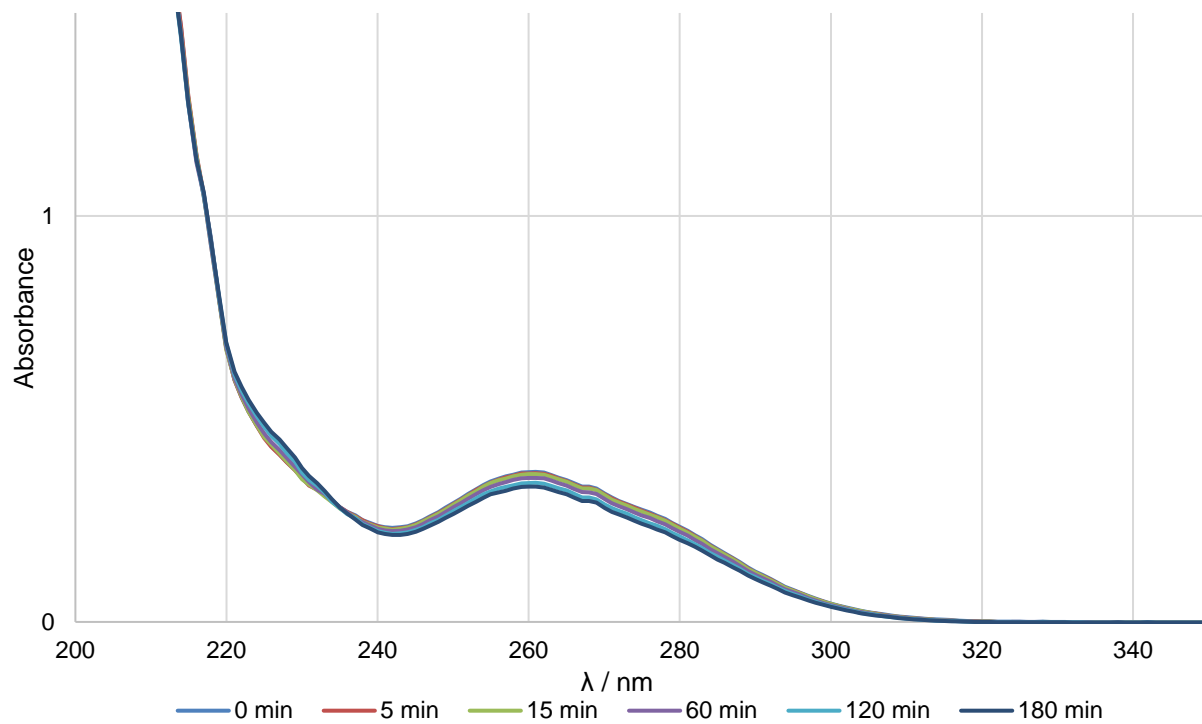

**Figure S58:** UV-vis spectra of  $\text{Ph}_3\text{P}$  after irradiation with  $\lambda = 365$  nm as long as indicated.

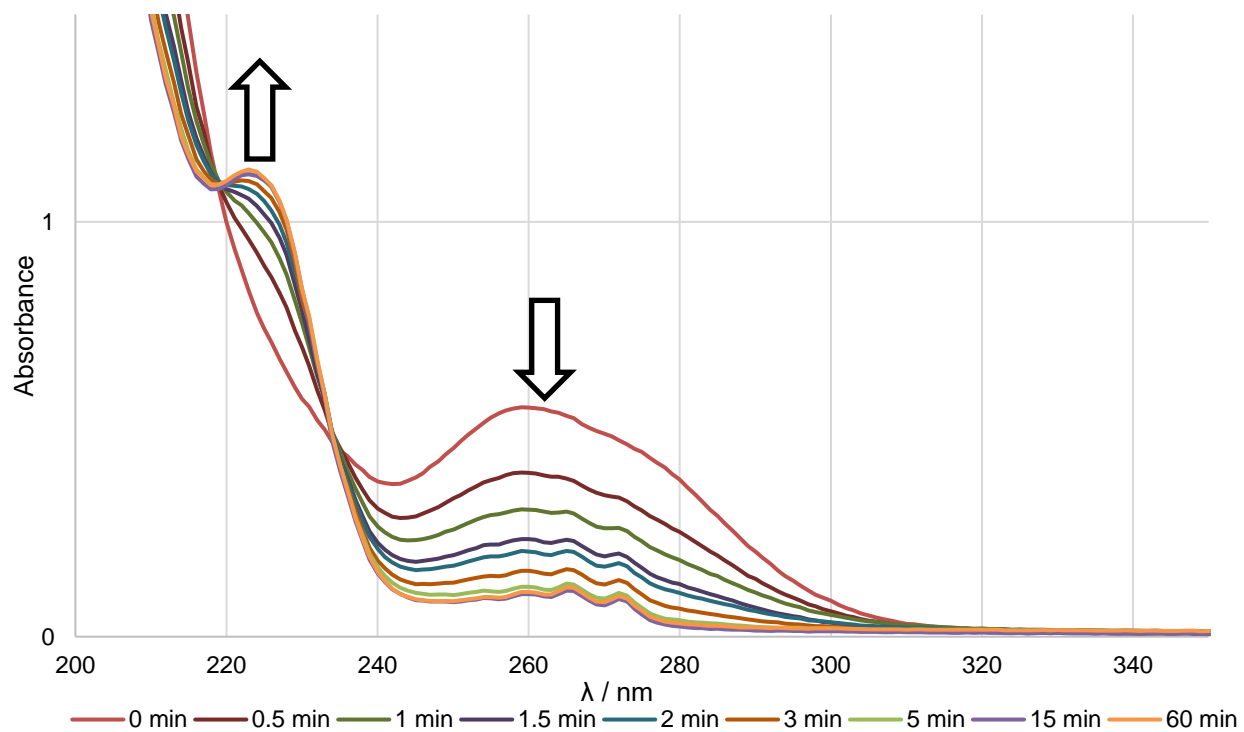

**Figure S59:** UV-vis spectra of  $\text{Ph}_3\text{P}$  under  $\text{SF}_6$  atmosphere after irradiation with  $\lambda = 310$  nm as long as indicated.

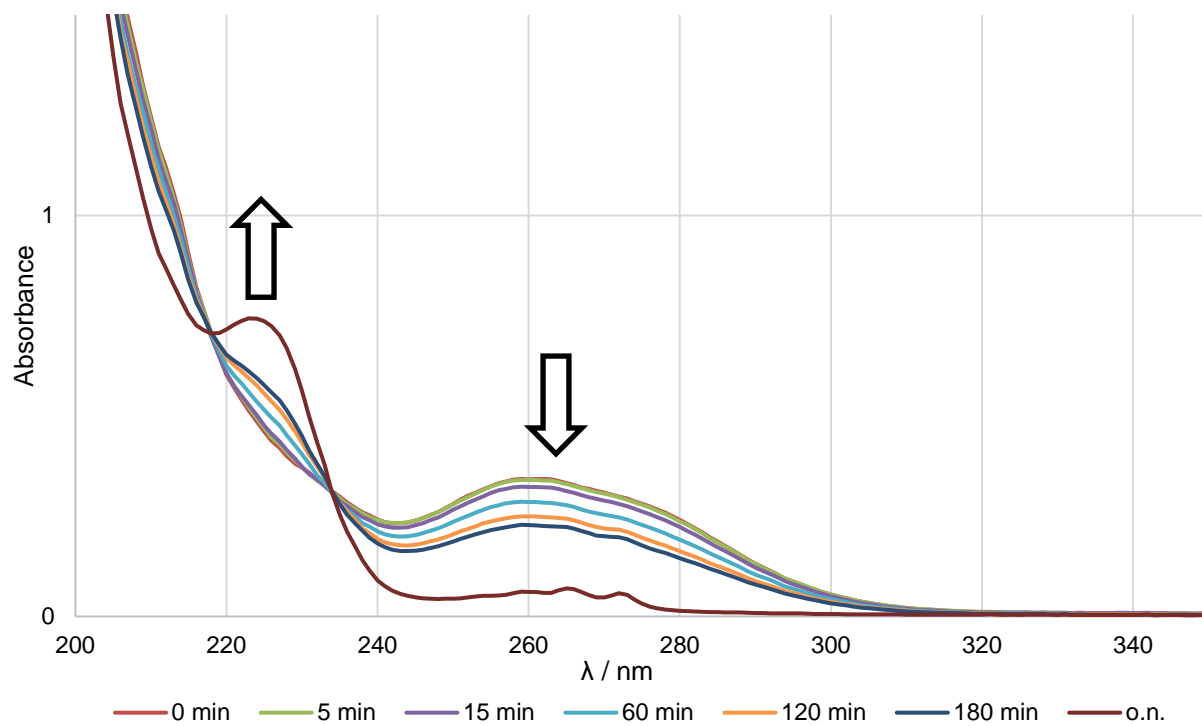

**Figure S60:** UV-vis spectra of Ph<sub>3</sub>P under SF<sub>6</sub> atmosphere after irradiation with  $\lambda = 365$  nm as long as indicated.

# DFT Calculations

## Methods

All geometry optimizations and energy evaluations were performed with the TURBOMOLE 7.4<sup>[4]</sup> program. The structures were optimized without any geometry constraints using the TPSS meta-GGA functional<sup>[5]</sup> and an atom-pairwise dispersion correction (D3)<sup>[6]</sup>. A flexible triple zeta basis set (def2-TZVP)<sup>[7]</sup> was used in all calculations. For the calculation of free energy contributions of translation, rotations and harmonic vibrations ( $G^{\text{RRHO}}_{298}$ ), a rotor approximation was applied for vibrational modes with wave numbers below  $100 \text{ cm}^{-1}$ <sup>[8]</sup>. Single point calculations were performed with the hybrid functional PW6B95(-D3).<sup>[9]</sup> Free energies of solvation ( $G^{\text{sol}}_{298}$ ) were obtained with the COSMO-RS<sup>[10]</sup> model for 298 K using THF as solvent.

Theoretical electronic excitation spectra (UV/VIS) were obtained using the TD-DFT formalism implemented in ORCA.<sup>[11]</sup> The hybrid functional B3LYP<sup>[12]</sup> was chosen as it qualitatively reproduced the UV spectra of phosphines well. TD-DFT calculations employed the def2-TZVP basis set and an implicit solvent model (CPCM).<sup>[13]</sup> The conical intersection S0/S1 of the SF<sub>6</sub> complexes of Ph<sub>3</sub>P was optimized with the range-separated hybrid functional CAM-B3LYP<sup>[14]</sup> and the def2-SVP basis set.

**Figure S61:** Frontier orbitals of the encounter complex [Ph<sub>3</sub>P...SF<sub>6</sub>]. Orbital energies calculated with B3LYP/def2-TZVP+CPCM(THF). Isosurface value 0.05 a.u.

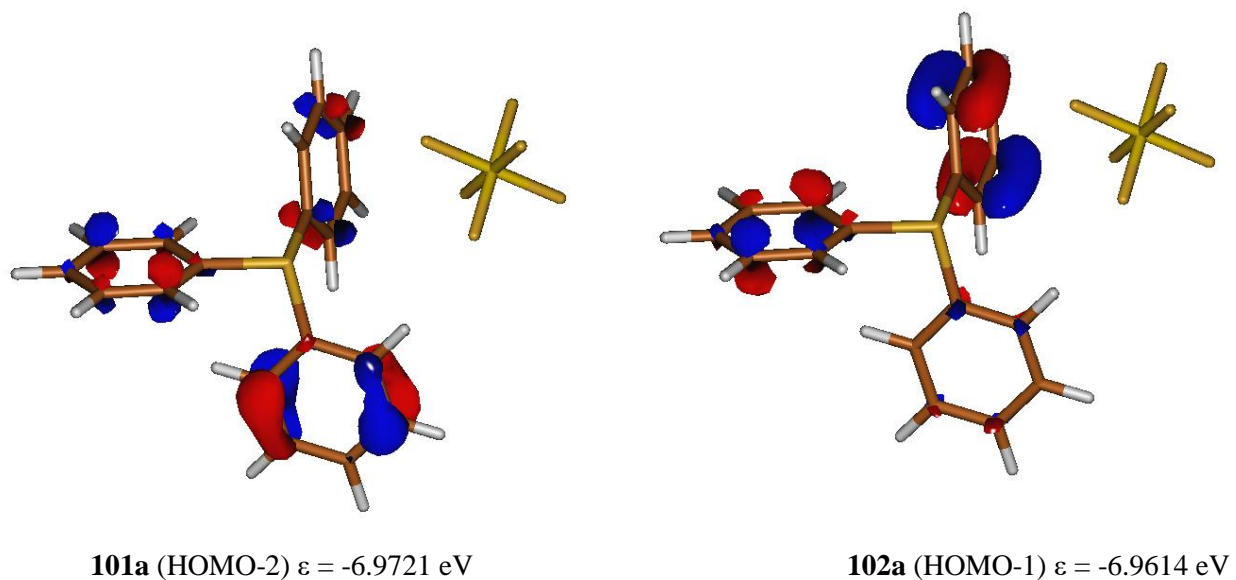

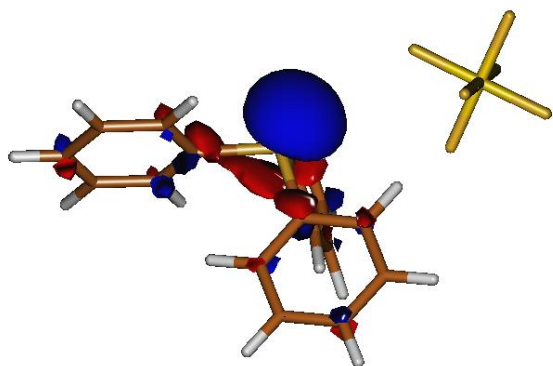

**103a (HOMO)**  $\epsilon = -6.0029$  eV

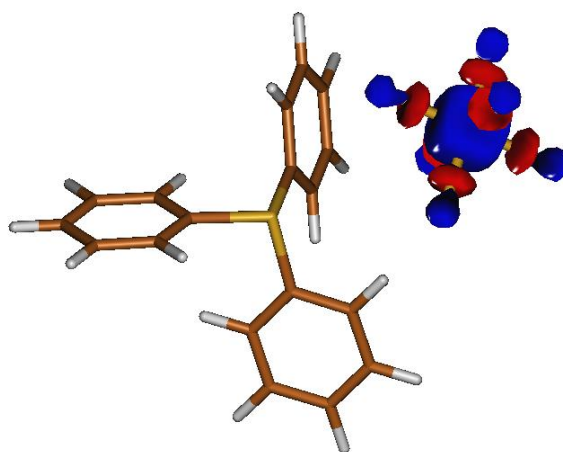

**104a (LUMO)**  $\epsilon = -2.1771$  eV

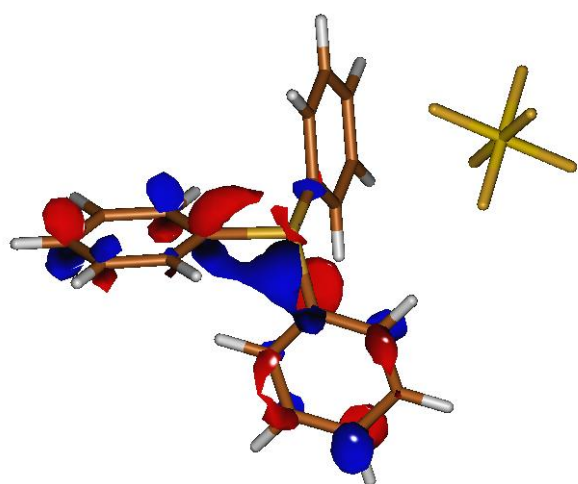

**105a (LUMO+1)**  $\epsilon = -0.8901$  eV

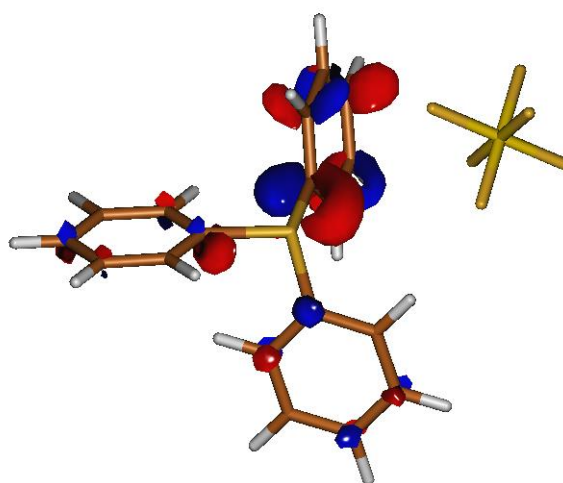

**106a (LUMO+2)**  $\epsilon = -0.8608$  eV

**Table S3:** Relative energies of molecular species in the reaction of Ph<sub>3</sub>P with SF<sub>6</sub>, calculated with DFT<sup>[a]</sup>. The relative free energy *with respect to isolated Ph<sub>3</sub>P and SF<sub>6</sub>* is  $\Delta G(298)_{\text{solv}} = \Delta E(\text{PW6B95-D3//TPSS-D3/def2-TZVP}) + \Delta G^{\text{RRHO}}_{298} + \Delta G^{\text{solv}}_{298}$

|                                                                                | E(TPSS-D3)        | E(PW6B95-D3)                 | G <sup>RRHO</sup> <sub>298</sub> | G <sup>solv</sup> <sub>298</sub><br>(THF) | $\Delta G(298)_{\text{solv}}$<br>(THF)              |
|--------------------------------------------------------------------------------|-------------------|------------------------------|----------------------------------|-------------------------------------------|-----------------------------------------------------|
|                                                                                | [E <sub>h</sub> ] | [E <sub>h</sub> ]            | [kcal/mol]                       | [kcal/mol]                                | [kcal/mol]                                          |
| <b>Ph<sub>3</sub>P</b>                                                         | -1036.77148025    | -1037.79879736               | 141.946289                       | -11.529                                   |                                                     |
| <b>SF<sub>6</sub></b>                                                          | -997.54592519     | -998.41670244                | -6.29516                         | 3.392                                     |                                                     |
| <b>Ph<sub>3</sub>P + SF<sub>6</sub></b>                                        | -2034.317405      | -2036.215500                 | 135.651                          | -8.137                                    | <b>0.0</b>                                          |
| <b>[Ph<sub>3</sub>P⋯SF<sub>6</sub>]</b>                                        | -2034.3223637     | -2036.2206741                | 148.208                          | -11.803                                   | <b>+5.6</b>                                         |
| <sup>3</sup> [Ph <sub>3</sub> P⋯SF <sub>6</sub> ] <sub>S0</sub> <sup>[b]</sup> |                   | -2036.0742436 <sup>[b]</sup> |                                  |                                           | <b><math>\Delta E = +91.9</math></b> <sup>[c]</sup> |
| <b>[Ph<sub>3</sub>P⋯SF<sub>6</sub>]<sub>CI</sub><sup>[d]</sup></b>             |                   | -2036.1770221                |                                  |                                           | <b><math>\Delta E = +27.4</math></b> <sup>[c]</sup> |
| <sup>3</sup> [Ph <sub>3</sub> P⋯SF <sub>6</sub> ] <sub>CI</sub> <sup>[d]</sup> |                   | -2036.1071200                |                                  |                                           | <b><math>\Delta E = +71.3</math></b> <sup>[c]</sup> |
| <b>[Ph<sub>3</sub>P]<sup>+</sup></b>                                           | -1036.524386      | -1037.5448667                | 142.803                          | -42.178                                   |                                                     |
| <b>[SF<sub>6</sub>]<sup>-</sup></b>                                            | -997.606067       | -998.4556861                 | -13.395                          | -45.112                                   |                                                     |
| <b>[Ph<sub>3</sub>P]<sup>+</sup> + [SF<sub>6</sub>]<sup>-</sup></b>            | -2034.13045281    | -2036.00055277               | 129.409                          | -87.291                                   | <b>+49.5</b>                                        |
| <sup>3</sup> [Ph <sub>3</sub> PF⋯SF <sub>5</sub> ]                             | -2034.2810208     | -2036.1633405                | 145.407                          | -12.090                                   | <b>+38.5</b>                                        |
| <b>Ph<sub>3</sub>PF</b>                                                        | -1136.655301      | -1137.77212248               | 141.465                          | -11.469                                   |                                                     |
| <b>SF<sub>5</sub></b>                                                          | -897.617778       | -898.38138868                | -9.644                           | 2.385                                     |                                                     |
| <b>Ph<sub>3</sub>PF + SF<sub>5</sub></b>                                       | -2034.2730781     | -2036.1535112                | 131.821                          | -9.086                                    | <b>+34.1</b>                                        |
| <b>Ph<sub>3</sub>PF<sup>+</sup></b>                                            | -1136.493153      | -1137.61522193               | 144.493                          | -42.039                                   |                                                     |
| <b>SF<sub>5</sub><sup>-</sup></b>                                              | -897.755632       | -898.51933205                | -11.837                          | -46.550                                   |                                                     |
| <b>Ph<sub>3</sub>PF<sup>+</sup> + SF<sub>5</sub><sup>-</sup></b>               | -2034.13045281    | -2036.00055277               | 129.408667                       | -87.291                                   | <b>-32.7</b>                                        |
| <b>Ph<sub>3</sub>PF<sub>2</sub></b>                                            | -1236.631048      | -1237.8541761                | 145.485                          | -12.043                                   |                                                     |
| <b>SF<sub>4</sub></b>                                                          | -797.771418       | -798.4434374                 | -11.070                          | 1.307                                     |                                                     |
| <b>Ph<sub>3</sub>PF<sub>2</sub> + SF<sub>4</sub></b>                           | -2034.4024665     | -2036.29761357               | 134.414375                       | -10.73601                                 | <b>-55.4</b>                                        |

[a] all calculations were performed with the def2-TZVP basis set

[b] Energy of Triplet state (T<sub>1</sub>) at the optimized ground state structure of the complex

[c] Gas phase electronic energy (PW6B95-D3/def2-TZVP) of the ground state (S<sub>0</sub> or T<sub>1</sub>, resp.)

[d] Optimized structure of the conical intersection S<sub>0</sub>/S<sub>1</sub> (CAM-B3LYP/def2-SVP)

**Figure S62:** (a) Spin density  $\rho_{\alpha-\rho\beta}$  (isosurface value = 0.005 a.u.,) and (b) electrostatic potential (isodensity value 0.02 a.u.) of the optimized triplet state  $^3[\text{Ph}_3\text{PF}...\text{SF}_5]$  (PW6B95//TPSS-D3/def2-TZVP).

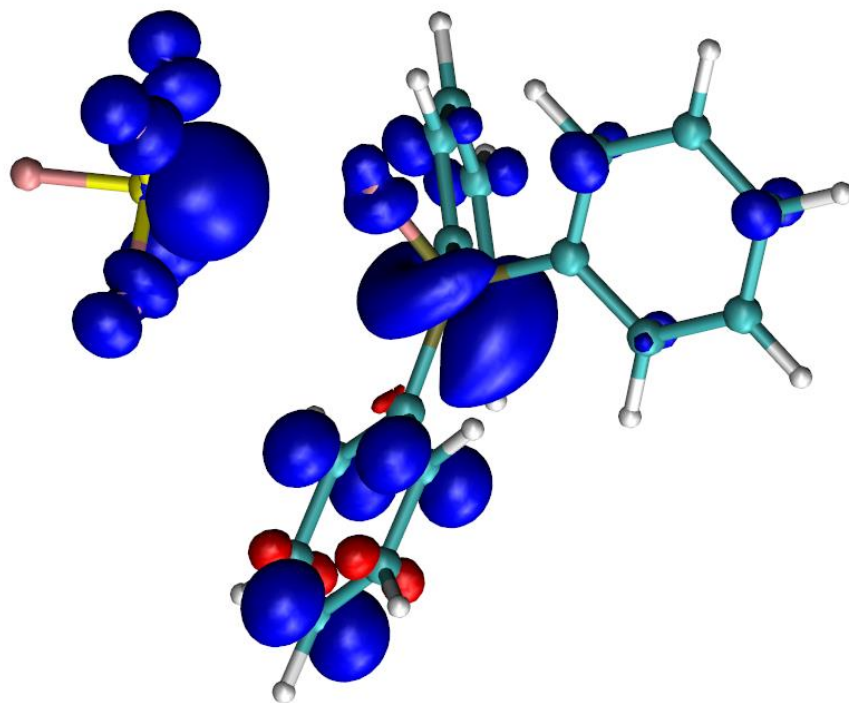

(a)

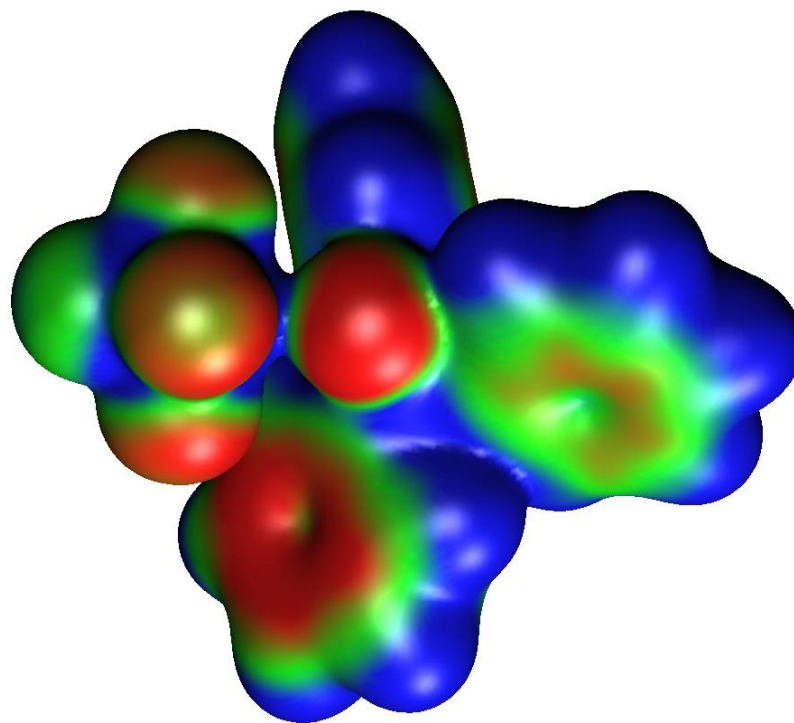

(b)



**Table S4:** Relative energies of phosphines and noncovalent complexes with SF<sub>6</sub> as calculated with DFT<sup>[a]</sup>. The relative free energy *with respect to isolated R<sub>3</sub>P and SF<sub>6</sub>* is  $\Delta G(298)_{\text{solv}} = \Delta E(\text{PW6B95-D3//TPSS-D3/def2-TZVP}) + \Delta G^{\text{RRHO}}_{298} + \Delta G^{\text{solv}}_{298}$

|                                                | E(TPSS-D3)<br>[E <sub>h</sub> ] | E(PW6B95-D3)<br>[E <sub>h</sub> ] | G <sup>RRHO</sup> <sub>298</sub><br>[kcal/mol] | G <sup>solv</sup> <sub>298</sub><br>(THF)<br>[kcal/mol] | $\Delta G(298)_{\text{solv}}$<br>(THF)<br>[kcal/mol] |
|------------------------------------------------|---------------------------------|-----------------------------------|------------------------------------------------|---------------------------------------------------------|------------------------------------------------------|
| <b>SF<sub>6</sub></b>                          | -997.54592519                   | -998.41670244                     | -6.29516                                       | 3.392                                                   |                                                      |
| <b>Mes<sub>3</sub>P</b>                        | -1390.828460                    | -1392.226365                      | 286.051                                        | -14.400                                                 |                                                      |
| <b>[Mes<sub>3</sub>P⋯SF<sub>6</sub>]</b>       | -2388.381017                    | -2390.650483                      | 293.720                                        | -14.583                                                 | <b>+5.7</b>                                          |
| <b>Et<sub>3</sub>P</b>                         | -579.219311                     | -579.730250                       | 100.572                                        | -2.295                                                  |                                                      |
| <b>[Et<sub>3</sub>P⋯SF<sub>6</sub>]</b>        | -1576.769062                    | -1578.150790                      | 106.484                                        | -3.012                                                  | <b>+5.7</b>                                          |
| <b>(2-MeOPh)<sub>3</sub>P</b>                  | -1380.548874                    | -1381.915049                      | 196.980                                        | -17.008                                                 |                                                      |
| <b>[(2-MeOPh)<sub>3</sub>P⋯SF<sub>6</sub>]</b> | -2378.101864                    | -2380.339657                      | 204.192                                        | -16.317                                                 | <b>+5.8</b>                                          |
| <b>(4-MeOPh)<sub>3</sub>P</b>                  | -1380.548337                    | -1381.913911                      | 196.644                                        | -17.335                                                 |                                                      |
| <b>[(4-MeOPh)<sub>3</sub>P⋯SF<sub>6</sub>]</b> | -2378.100768                    | -2380.337909                      | 203.314                                        | -17.358                                                 | <b>+5.0</b>                                          |

[a] all calculations were performed with the def2-TZVP basis set

**Figure S63:** TD-DFT calculated electronic excitation spectra of selected phosphines.

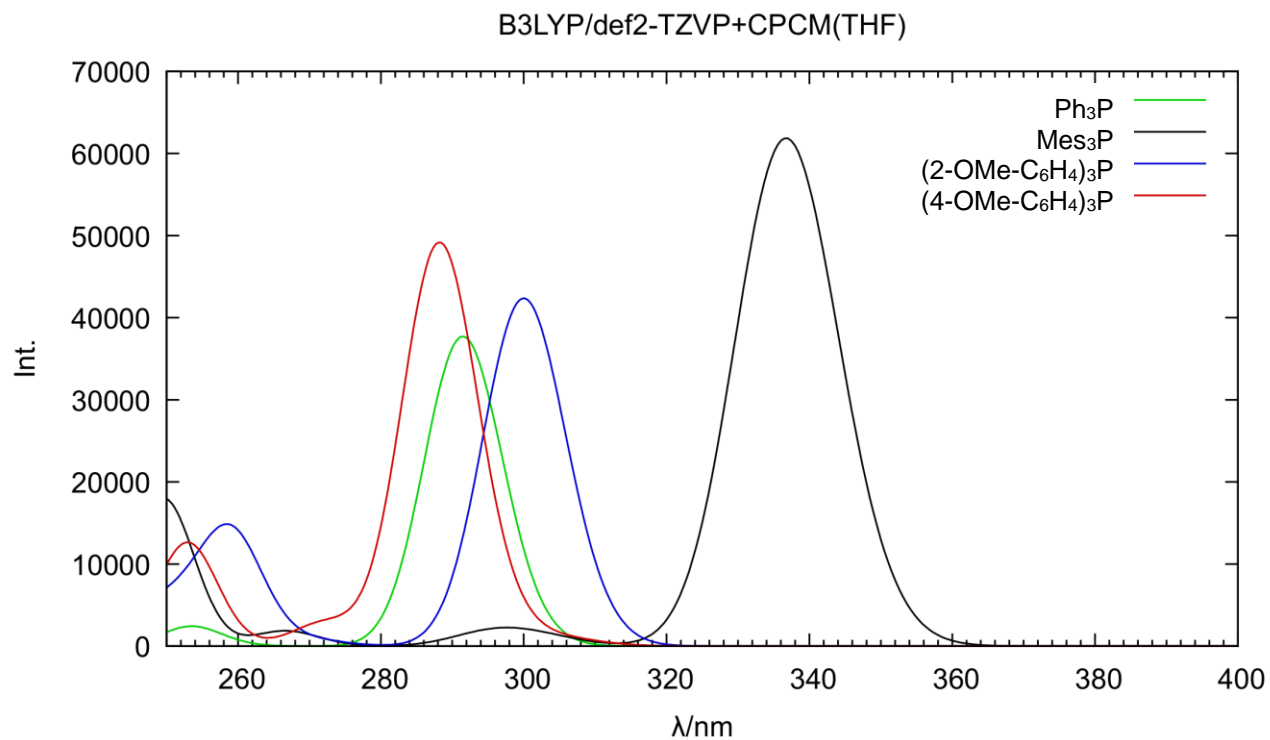

| Phosphine                | calculated wavelength of $n(\text{P}) \rightarrow \pi^*(\text{Ar})$ absorptions |
|--------------------------|---------------------------------------------------------------------------------|
| Ph <sub>3</sub> P        | 291.1 / 291.9 nm                                                                |
| Mes <sub>3</sub> P       | 336.4 / 337.1 nm                                                                |
| (2-MeOPh) <sub>3</sub> P | 299.4 / 300.7 nm                                                                |
| (4-MeOPh) <sub>3</sub> P | 288.0 / 288.4 nm                                                                |

**Figure S64:** TD-DFT calculated spectra of  $[\text{R}_3\text{P}\cdots\text{SF}_6]$  (R= Ph, Mes, 2-MeOPh, 4-MeOPh).

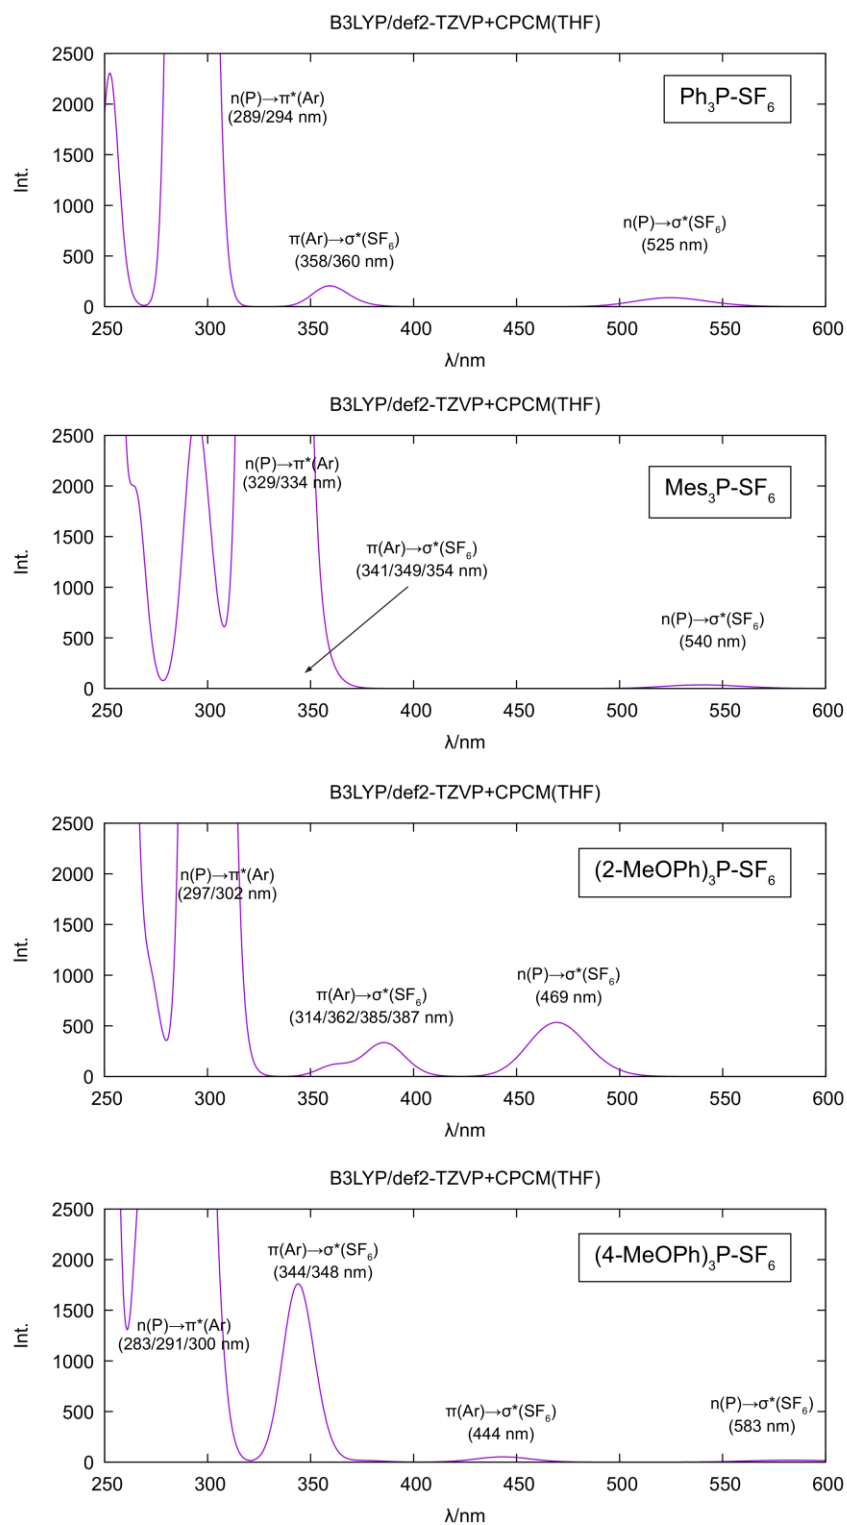

## DFT optimized (TPSS-D3/def2-TZVP) cartesian coordinates

### Ph<sub>3</sub>P

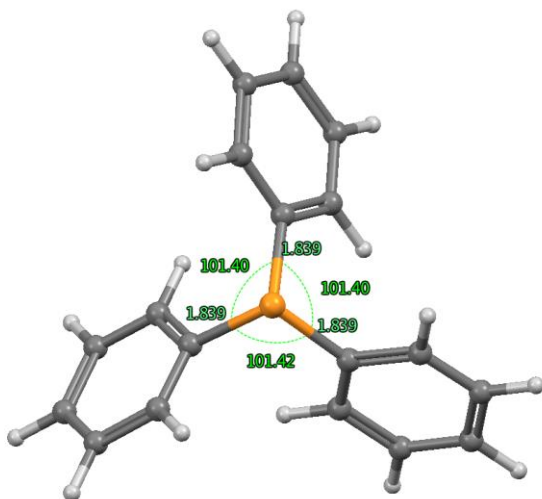

E(TPSS-D3/def2-TZVP) = -1036.771480251 (conv)

Lowest Freq. = 22.79 cm<sup>-1</sup>

34

Ph3P (001/c1/tpss-d3.def2-TZVP)

|   |            |            |            |
|---|------------|------------|------------|
| P | 0.3210152  | -0.3989570 | -1.3525594 |
| C | 1.3163172  | -1.1641810 | -0.0083857 |
| C | 1.5845595  | -2.5385634 | -0.1128352 |
| C | 1.8229995  | -0.4592194 | 1.0915067  |
| C | 2.5733494  | -1.1160092 | 2.0678480  |
| C | 2.3206542  | -3.1965064 | 0.8700328  |
| C | 2.8197323  | -2.4850030 | 1.9631824  |
| H | 1.6288512  | 0.6050928  | 1.1838363  |
| H | 1.2095135  | -3.0921188 | -0.9707582 |
| H | 2.9617102  | -0.5561347 | 2.9145090  |
| H | 2.5141025  | -4.2617962 | 0.7782772  |
| H | 3.4025923  | -2.9946675 | 2.7252670  |
| C | 0.4891067  | 1.3896031  | -0.9573795 |
| C | 1.6124540  | 2.0568371  | -1.4714660 |
| C | -0.4338737 | 2.1135518  | -0.1907005 |
| C | -0.2327236 | 3.4710625  | 0.0623566  |
| C | 1.8202981  | 3.4086667  | -1.2059703 |
| C | 0.8953320  | 4.1205608  | -0.4393975 |
| H | -1.3106263 | 1.6129538  | 0.2090439  |
| H | 2.3266713  | 1.5079200  | -2.0810821 |
| H | -0.9576602 | 4.0205194  | 0.6570591  |
| H | 2.6978273  | 3.9094534  | -1.6057717 |
| H | 1.0505301  | 5.1772086  | -0.2402071 |
| C | -1.3920409 | -0.7392579 | -0.7754011 |
| C | -1.7067198 | -1.2471325 | 0.4921688  |
| C | -2.4357229 | -0.4770437 | -1.6773597 |
| C | -3.7626071 | -0.6947894 | -1.3128237 |
| C | -3.0351519 | -1.4791304 | 0.8512454  |
| C | -4.0656341 | -1.1996146 | -0.0465248 |
| H | -2.2012593 | -0.0975748 | -2.6693750 |
| H | -0.9103018 | -1.4601805 | 1.1988328  |
| H | -4.5595808 | -0.4809713 | -2.0197922 |
| H | -3.2645106 | -1.8748848 | 1.8370764  |
| H | -5.0992035 | -1.3796936 | 0.2355475  |

## SF<sub>6</sub>

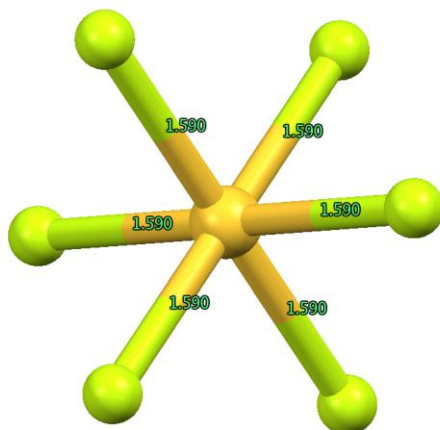

E(TPSS-D3/def2-TZVP) = -997.5459251875 (conv)

Lowest Freq. = 320.64 cm<sup>-1</sup>

7

SF6 (002/c1/tpss-d3.def2-TZVP)

F -0.6491881 1.1241472 -0.9170930

S -0.0000006 -0.0000000 0.0008627

F 0.6491858 -1.1241385 0.9188558

F -1.2984093 0.0000000 0.9188833

F 1.2984146 0.0000000 -0.9171194

F -0.6491881 -1.1241472 -0.9170930

F 0.6491858 1.1241385 0.9188558

## SF<sub>4</sub>

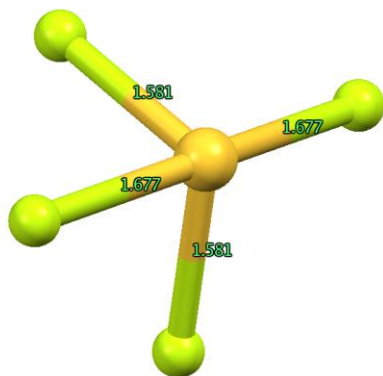

E(TPSS-D3/def2-TZVP) = -797.7714180734 (conv)

Lowest Freq. = 205.57 cm<sup>-1</sup>

5

SF4 (009/c1/tpss-d3.def2-TZVP)

F -0.6828666 1.0976807 -1.0704321

S -0.0327748 -0.0356434 -0.0195444

F 0.6837916 -1.2692112 0.8619079

F 1.3334949 0.1147520 -0.8012164

F -0.7547791 -1.1514562 -0.8759863

# [Ph<sub>3</sub>P-SF<sub>6</sub>]

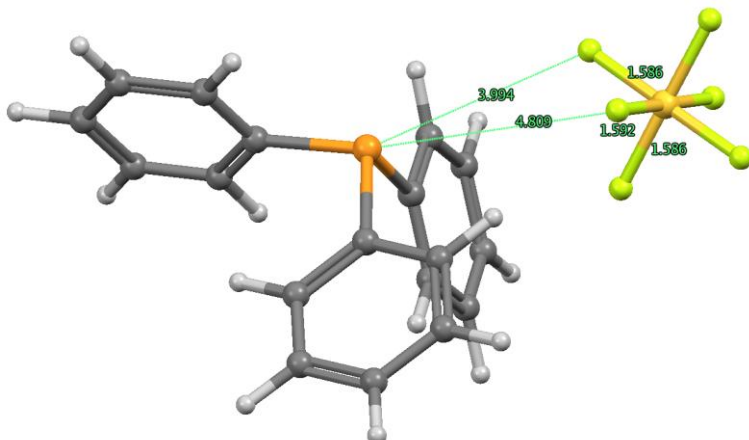

E(TPSS-D3/def2-TZVP) = -2034.322363702 (conv)

Lowest Freq. = 5.75 cm<sup>-1</sup>

41

[Ph<sub>3</sub>P-SF<sub>6</sub>] (003/c1/tpss-d3.def2-TZVP)

|   |            |            |            |
|---|------------|------------|------------|
| P | -0.6089820 | -0.1350764 | -0.8219114 |
| C | 0.5019324  | -0.9446933 | 0.3993581  |
| C | 0.6513355  | -2.3378388 | 0.3047065  |
| C | 1.2280979  | -0.2537767 | 1.3779897  |
| C | 2.0826097  | -0.9406489 | 2.2418012  |
| C | 1.4925643  | -3.0243640 | 1.1765381  |
| C | 2.2153634  | -2.3256493 | 2.1462414  |
| H | 1.1271925  | 0.8239555  | 1.4621522  |
| H | 0.1052238  | -2.8830129 | -0.4617163 |
| H | 2.6425460  | -0.3905151 | 2.9933837  |
| H | 1.5940659  | -4.1029674 | 1.0924518  |
| H | 2.8813450  | -2.8584326 | 2.8191440  |
| C | -0.3395526 | 1.6438794  | -0.4397467 |
| C | 0.7341329  | 2.2834929  | -1.0798488 |
| C | -1.1426251 | 2.3863316  | 0.4363950  |
| C | -0.8722430 | 3.7347020  | 0.6729469  |
| C | 1.0127838  | 3.6258429  | -0.8309559 |
| C | 0.2075132  | 4.3563113  | 0.0452509  |
| H | -1.9804911 | 1.9074555  | 0.9340459  |
| H | 1.3536670  | 1.7219390  | -1.7742110 |
| H | -1.5050257 | 4.2989338  | 1.3528992  |
| H | 1.8514890  | 4.1047347  | -1.3288969 |
| H | 0.4171309  | 5.4058117  | 0.2320899  |
| C | -2.2587448 | -0.4270001 | -0.0635332 |
| C | -2.4489011 | -0.8947648 | 1.2438434  |
| C | -3.3853094 | -0.1652525 | -0.8592609 |
| C | -4.6710239 | -0.3455315 | -0.3533469 |
| C | -3.7365689 | -1.0887691 | 1.7450899  |
| C | -4.8496024 | -0.8109268 | 0.9509946  |
| H | -3.2481209 | 0.1829875  | -1.8804901 |
| H | -1.5867045 | -1.1066199 | 1.8690460  |
| H | -5.5331418 | -0.1334704 | -0.9798047 |
| H | -3.8697766 | -1.4538024 | 2.7600224  |
| H | -5.8512561 | -0.9620511 | 1.3435846  |
| F | 3.5051417  | -0.7443613 | -1.1869683 |
| S | 3.6818636  | -1.2713750 | -2.6720341 |
| F | 3.8648674  | -1.7941993 | -4.1641681 |
| F | 4.5751140  | -2.4758143 | -2.1417164 |
| F | 2.7927629  | -0.0646741 | -3.2081707 |
| F | 2.3810765  | -2.1657247 | -2.5201886 |
| F | 4.9882508  | -0.3750650 | -2.8330068 |

# [Ph<sub>3</sub>P]<sup>+</sup>

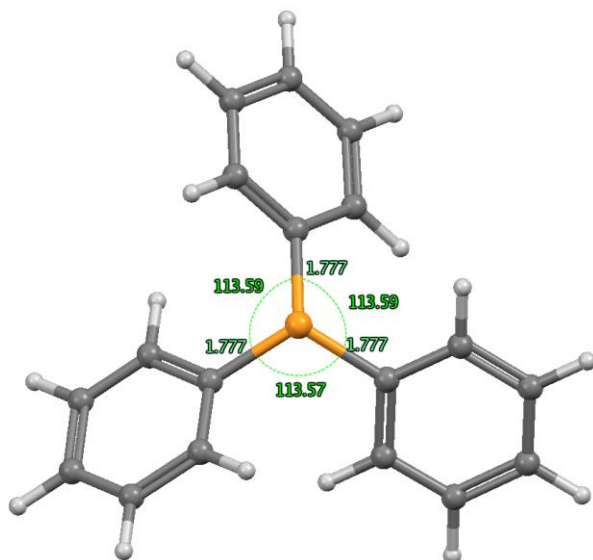

E(TPSS-D3/def2-TZVP) = -1036.524385914 (conv)

Lowest Freq. = 35.23 cm<sup>-1</sup>

34

[Ph<sub>3</sub>P]cat (004/c1/tpss-d3.def2-TZVP)

|   |            |            |            |
|---|------------|------------|------------|
| P | 0.1779459  | -0.2223137 | -0.7528739 |
| C | 1.3186627  | -1.1210012 | 0.2713110  |
| C | 1.3581531  | -2.5274146 | 0.1558845  |
| C | 2.1973701  | -0.4560847 | 1.1496564  |
| C | 3.0829573  | -1.1993017 | 1.9210311  |
| C | 2.2465014  | -3.2551354 | 0.9365912  |
| C | 3.1094124  | -2.5932863 | 1.8163480  |
| H | 2.1642145  | 0.6245057  | 1.2397673  |
| H | 0.7010592  | -3.0365822 | -0.5433690 |
| H | 3.7492326  | -0.6925832 | 2.6118888  |
| H | 2.2770776  | -4.3366610 | 0.8530029  |
| H | 3.8070975  | -3.1657357 | 2.4196081  |
| C | 0.4281751  | 1.5368249  | -0.7222077 |
| C | 1.6865680  | 2.0418424  | -1.1148953 |
| C | -0.6084482 | 2.4191859  | -0.3580995 |
| C | -0.3716885 | 3.7887166  | -0.3621226 |
| C | 1.9074568  | 3.4127739  | -1.1099563 |
| C | 0.8803265  | 4.2857729  | -0.7365511 |
| H | -1.5742793 | 2.0299948  | -0.0538218 |
| H | 2.4754544  | 1.3621139  | -1.4240271 |
| H | -1.1616991 | 4.4711481  | -0.0652533 |
| H | 2.8747002  | 3.8042874  | -1.4078497 |
| H | 1.0553035  | 5.3571152  | -0.7409460 |
| C | -1.5169966 | -0.7030857 | -0.5205581 |
| C | -1.8962642 | -1.5790447 | 0.5160241  |
| C | -2.4814446 | -0.2184462 | -1.4303887 |
| C | -3.8123140 | -0.5846952 | -1.2791766 |
| C | -3.2320154 | -1.9386185 | 0.6509461  |
| C | -4.1878548 | -1.4448546 | -0.2420167 |
| H | -2.1830487 | 0.4329216  | -2.2469091 |
| H | -1.1548656 | -1.9485560 | 1.2164937  |
| H | -4.5569017 | -0.2111217 | -1.9746043 |
| H | -3.5314702 | -2.5988113 | 1.4586820  |
| H | -5.2283781 | -1.7338697 | -0.1316085 |

[SF<sub>6</sub>]<sup>-</sup>

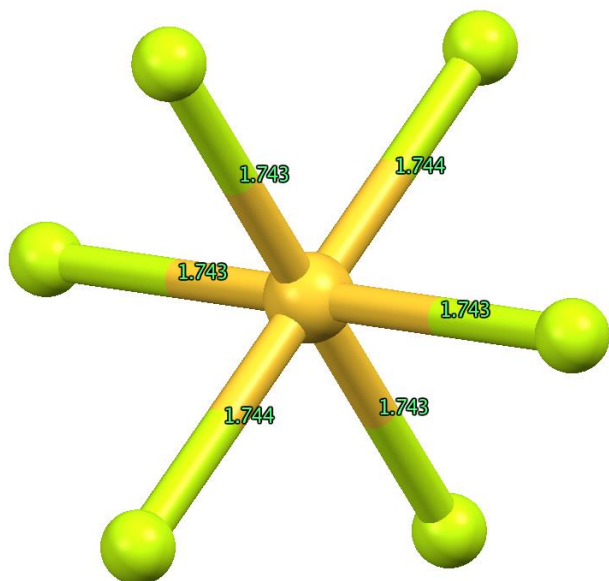

E(TPSS-D3/def2-TZVP) = -997.6060668984 (conv)

Lowest Freq. = 127.42 cm<sup>-1</sup>

7

[SF6]anion (005/c1/tpss-d3.def2-TZVP)

|   |            |            |            |
|---|------------|------------|------------|
| F | -0.7118737 | 1.2325965  | -1.0056387 |
| S | 0.0000003  | 0.0000000  | 0.0008824  |
| F | 0.7118764  | -1.2325989 | 1.0073941  |
| F | -1.4238051 | -0.0000000 | 1.0074328  |
| F | 1.4237993  | -0.0000000 | -1.0056739 |
| F | -0.7118737 | -1.2325965 | -1.0056387 |
| F | 0.7118764  | 1.2325989  | 1.0073941  |

<sup>3</sup>[Ph<sub>3</sub>PF-SF<sub>5</sub>]

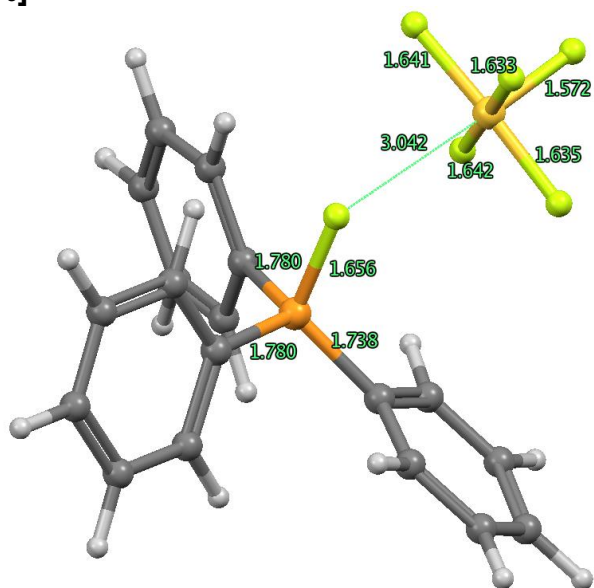



E(TPSS-D3/def2-TZVP) = -2034.281020752 (conv)

Lowest Freq. = 6.04 cm<sup>-1</sup>

41

3[Ph3PF-SF5] (003-T/c1/tpss-d3.def2-TZVP)

|   |            |            |            |
|---|------------|------------|------------|
| P | -0.3526039 | -0.0756808 | -0.2032386 |
| C | 0.8294031  | -1.0932679 | 0.6546661  |
| C | 1.1048564  | -2.4049141 | 0.2139278  |
| C | 1.3732001  | -0.6568476 | 1.8810967  |
| C | 2.2021177  | -1.4917165 | 2.6175186  |
| C | 1.9171532  | -3.2419876 | 0.9748504  |
| C | 2.4757105  | -2.7914005 | 2.1708321  |
| H | 1.1334810  | 0.3356634  | 2.2502736  |
| H | 0.6972554  | -2.7551681 | -0.7276524 |
| H | 2.6259132  | -1.1365802 | 3.5524685  |
| H | 2.1241890  | -4.2485573 | 0.6225541  |
| H | 3.1154073  | -3.4454407 | 2.7557253  |
| C | 0.0169373  | 1.6200039  | -0.1031460 |
| C | 1.3504114  | 2.0709124  | 0.1242322  |
| C | -0.9748709 | 2.5966793  | -0.4139964 |
| C | -0.6587811 | 3.9447988  | -0.4060490 |
| C | 1.6422856  | 3.4240417  | 0.1251974  |
| C | 0.6451034  | 4.3780682  | -0.1250707 |
| H | -1.9817323 | 2.2790004  | -0.6649355 |
| H | 2.1423357  | 1.3478592  | 0.2858146  |
| H | -1.4338982 | 4.6711513  | -0.6351651 |
| H | 2.6641761  | 3.7437727  | 0.3102631  |
| H | 0.8853496  | 5.4364002  | -0.1287977 |
| C | -2.0735469 | -0.4257695 | 0.0875853  |
| C | -2.7887781 | 0.3230390  | 1.0457159  |
| C | -2.6856266 | -1.5582230 | -0.4901766 |
| C | -3.9805222 | -1.9165728 | -0.1225770 |
| C | -4.0888918 | -0.0278694 | 1.3825322  |
| C | -4.6908759 | -1.1536318 | 0.8045267  |
| H | -2.1495091 | -2.1415345 | -1.2306607 |
| H | -2.3123291 | 1.1730339  | 1.5247178  |
| H | -4.4408357 | -2.7912807 | -0.5735430 |
| H | -4.6326866 | 0.5670244  | 2.1107734  |
| H | -5.7031987 | -1.4327592 | 1.0809331  |
| F | 3.4280188  | -0.2434585 | -1.6858240 |
| S | 2.5101436  | -0.4140834 | -3.0366237 |
| F | 1.5385435  | -0.5942750 | -4.3370651 |
| F | 2.6840695  | -2.0428256 | -2.9433016 |
| F | 2.2723196  | 1.2024566  | -3.0790886 |
| F | -0.2112233 | -0.7367233 | -1.7155296 |
| F | 3.7815295  | -0.2933373 | -3.9537635 |

## Ph<sub>3</sub>PF

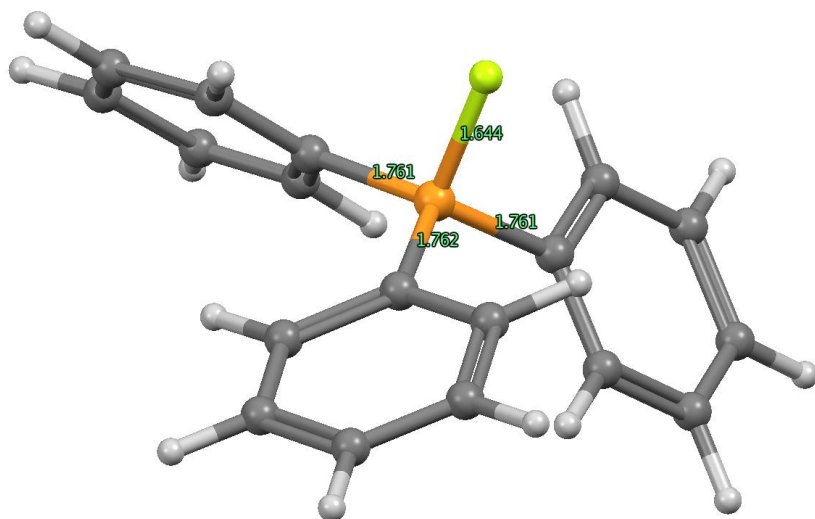

E(TPSS-D3/def2-TZVP) = -1136.655300530 (conv)

Lowest Freq. = 21.12 cm<sup>-1</sup>

35

Ph<sub>3</sub>PF (012/c1/tpss-d3.def2-TZVP)

|   |            |            |            |
|---|------------|------------|------------|
| P | 0.1958228  | -0.2439101 | -0.8219902 |
| C | 1.3565917  | -1.1236192 | 0.1683797  |
| C | 1.3743376  | -2.5403324 | 0.1321103  |
| C | 2.2238850  | -0.4532919 | 1.0608373  |
| C | 3.0720416  | -1.1757827 | 1.8862623  |
| C | 2.2120571  | -3.2504777 | 0.9852415  |
| C | 3.0678094  | -2.5790850 | 1.8620470  |
| H | 2.2114756  | 0.6312832  | 1.1049683  |
| H | 0.7357816  | -3.0700934 | -0.5686568 |
| H | 3.7345981  | -0.6464584 | 2.5652382  |
| H | 2.2106536  | -4.3366364 | 0.9521058  |
| H | 3.7283948  | -3.1386215 | 2.5171912  |
| C | 0.4206622  | 1.5035265  | -0.8276155 |
| C | 1.6889778  | 2.0445058  | -1.1543603 |
| C | -0.6151861 | 2.3815301  | -0.4356553 |
| C | -0.3865748 | 3.7476725  | -0.3713911 |
| C | 1.9094311  | 3.4144036  | -1.0591816 |
| C | 0.8785218  | 4.2748068  | -0.6738757 |
| H | -1.5877170 | 1.9771995  | -0.1727434 |
| H | 2.4869030  | 1.3865610  | -1.4857228 |
| H | -1.1933505 | 4.4103689  | -0.0712085 |
| H | 2.8886528  | 3.8156553  | -1.3059828 |
| H | 1.0531451  | 5.3446176  | -0.6127816 |
| C | -1.4753188 | -0.7584157 | -0.6105644 |
| C | -1.8558394 | -1.6179438 | 0.4451746  |
| C | -2.4797674 | -0.2383640 | -1.4646251 |
| C | -3.8166508 | -0.5496407 | -1.2411468 |
| C | -3.1907171 | -1.9394319 | 0.6382990  |
| C | -4.1827631 | -1.4020272 | -0.1966136 |
| H | -2.2016955 | 0.4000338  | -2.2980543 |
| H | -1.0965621 | -2.0135554 | 1.1125405  |
| H | -4.5773807 | -0.1383968 | -1.8991526 |
| H | -3.4674201 | -2.6029693 | 1.4527607  |
| H | -5.2270225 | -1.6505139 | -0.0338636 |
| F | 0.5630723  | -0.6939624 | -2.3600295 |

**[Ph<sub>3</sub>PF]<sup>+</sup>**

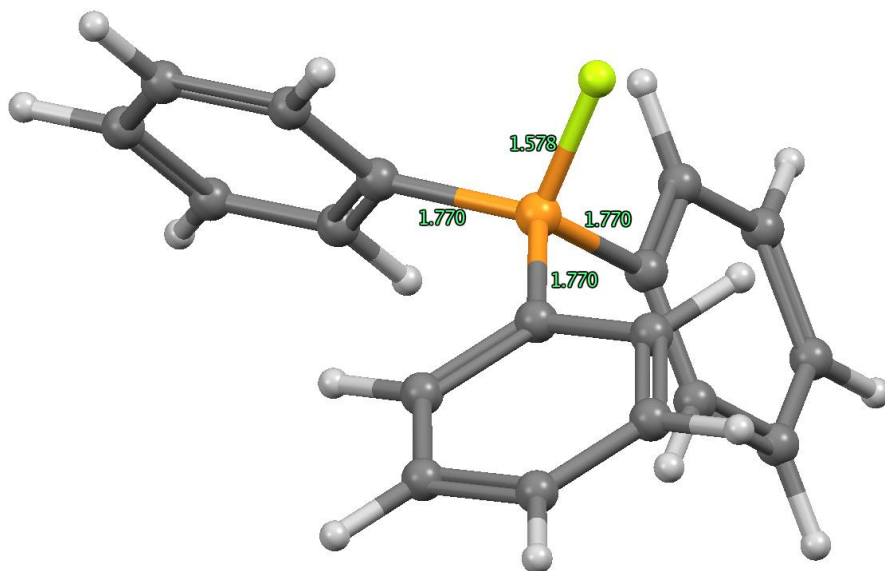

E(TPSS-D3/def2-TZVP) = -1136.493153045 (conv)

Lowest Freq. = 20.43 cm<sup>-1</sup>

35

[Ph<sub>3</sub>PF]cat (006/c1/tpss-d3.def2-TZVP)

|   |            |            |            |
|---|------------|------------|------------|
| P | 0.2100567  | -0.2593326 | -0.8771841 |
| C | 1.3227562  | -1.1482828 | 0.1738909  |
| C | 1.4409030  | -2.5438178 | 0.0254998  |
| C | 2.0529142  | -0.4686870 | 1.1632244  |
| C | 2.9004395  | -1.1885007 | 2.0011833  |
| C | 2.2964747  | -3.2468843 | 0.8651627  |
| C | 3.0220032  | -2.5707851 | 1.8511280  |
| H | 1.9567771  | 0.6069734  | 1.2716186  |
| H | 0.8781629  | -3.0662111 | -0.7426467 |
| H | 3.4677171  | -0.6702596 | 2.7673577  |
| H | 2.4007003  | -4.3209896 | 0.7511699  |
| H | 3.6873947  | -3.1267470 | 2.5043928  |
| C | 0.4588722  | 1.4919971  | -0.8111655 |
| C | 1.6653834  | 2.0339732  | -1.2944848 |
| C | -0.5264453 | 2.3226812  | -0.2516513 |
| C | -0.3012465 | 3.6947190  | -0.1784881 |
| C | 1.8717574  | 3.4063987  | -1.2210325 |
| C | 0.8918734  | 4.2332383  | -0.6627515 |
| H | -1.4541798 | 1.8978848  | 0.1183337  |
| H | 2.4235553  | 1.3899508  | -1.7303086 |
| H | -1.0579285 | 4.3424674  | 0.2519527  |
| H | 2.7943079  | 3.8334144  | -1.6005916 |
| H | 1.0604557  | 5.3043010  | -0.6078073 |
| C | -1.4806341 | -0.7167825 | -0.6207557 |
| C | -1.8496616 | -1.4395957 | 0.5261360  |
| C | -2.4503943 | -0.3183358 | -1.5610562 |
| C | -3.7818923 | -0.6552560 | -1.3491699 |
| C | -3.1888386 | -1.7630683 | 0.7275185  |
| C | -4.1494430 | -1.3737002 | -0.2071062 |
| H | -2.1622129 | 0.2378442  | -2.4483193 |
| H | -1.0971472 | -1.7425104 | 1.2471723  |
| H | -4.5339497 | -0.3607425 | -2.0738879 |
| H | -3.4809640 | -2.3214870 | 1.6108497  |
| H | -5.1917259 | -1.6320740 | -0.0474527 |
| F | 0.5630077  | -0.6931585 | -2.3527902 |

## SF<sub>5</sub>

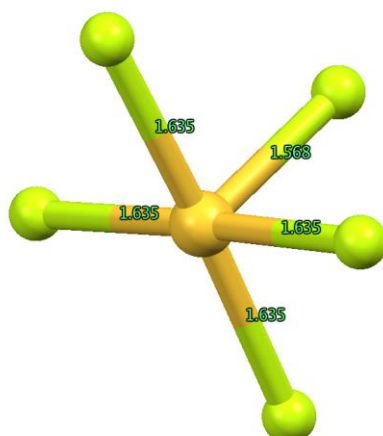

E(TPSS-D3/def2-TZVP) = -897.6177775607 (conv)

Lowest Freq. = 215.80 cm<sup>-1</sup>

6

SF5 (013/c1/tpss-d3.def2-TZVP)

F -0.6773203 1.1557333 -0.9355896

S 0.0292537 -0.0000000 -0.0198138

F 0.6571274 -1.1553066 0.9517782

F 1.3095408 -0.0000000 -0.9252953

F -0.6773203 -1.1557333 -0.9355896

F 0.6571274 1.1553066 0.9517782

## [SF<sub>5</sub>]<sup>-</sup>

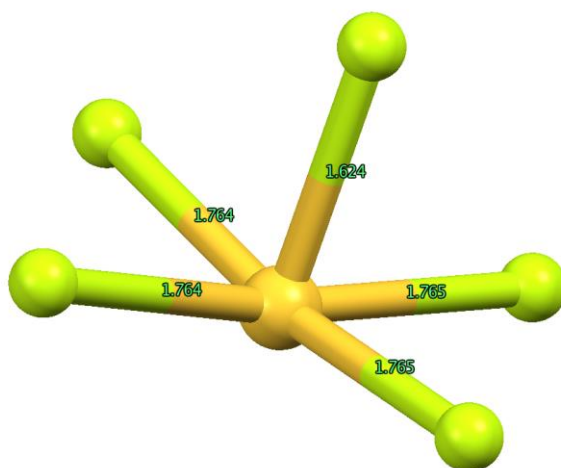

E(TPSS-D3/def2-TZVP) = -897.7556316581 (conv)

Lowest Freq. = 223.87 cm<sup>-1</sup>

6

[SF5]<sup>-</sup> (007/c1/tpss-d3.def2-TZVP)

F -0.6849557 1.2440791 -1.0381749

S -0.0806432 0.0000000 0.0579212

F 0.7515426 -1.2438782 0.9925397

F 1.2458783 -0.0000000 -0.8793825

F -0.6849557 -1.2440791 -1.0381749

F 0.7515426 1.2438782 0.9925397

## Ph<sub>3</sub>PF<sub>2</sub>

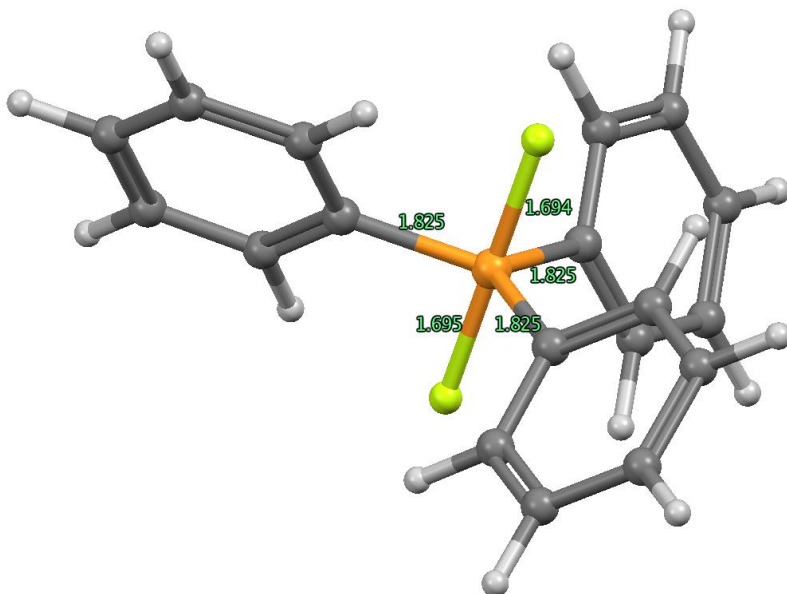

E(TPSS-D3/def2-TZVP) = -1236.631048428 (conv)

Lowest Freq. = 29.90 cm<sup>-1</sup>

36

Ph<sub>3</sub>PF<sub>2</sub> (008/c1/tpss-d3.def2-TZVP)

|   |            |            |            |
|---|------------|------------|------------|
| P | 0.4216789  | -0.1372490 | -0.4685022 |
| C | 1.5427356  | -1.2402727 | 0.4569772  |
| C | 1.6188820  | -2.6032088 | 0.1371741  |
| C | 2.3371744  | -0.7336774 | 1.4952754  |
| C | 3.2054421  | -1.5748055 | 2.1886179  |
| C | 2.4628961  | -3.4465997 | 0.8572205  |
| C | 3.2639579  | -2.9336133 | 1.8777775  |
| H | 2.2745789  | 0.3166276  | 1.7550803  |
| H | 1.0161105  | -2.9987788 | -0.6719554 |
| H | 3.8302655  | -1.1685084 | 2.9790056  |
| H | 2.5007662  | -4.5045729 | 0.6134966  |
| H | 3.9313871  | -3.5903561 | 2.4289084  |
| C | 1.0818678  | 1.3466165  | -1.3000857 |
| C | 2.1166708  | 1.2314380  | -2.2389608 |
| C | 0.5593882  | 2.6141045  | -1.0065900 |
| C | 1.0533347  | 3.7439735  | -1.6558782 |
| C | 2.6307478  | 2.3686189  | -2.8592412 |
| C | 2.0951702  | 3.6253939  | -2.5761678 |
| H | -0.2328319 | 2.7110883  | -0.2734362 |
| H | 2.5171206  | 0.2533123  | -2.4786282 |
| H | 0.6289959  | 4.7192789  | -1.4348025 |
| H | 3.4449714  | 2.2704903  | -3.5716975 |
| H | 2.4883453  | 4.5092106  | -3.0709346 |
| C | -1.3605636 | -0.5171300 | -0.5632231 |
| C | -2.1150050 | -0.6738184 | 0.6080942  |
| C | -1.9900267 | -0.6550620 | -1.8084358 |
| C | -3.3550701 | -0.9269957 | -1.8781719 |
| C | -3.4724143 | -0.9803173 | 0.5324641  |
| C | -4.0971979 | -1.0987850 | -0.7093436 |
| H | -1.4100863 | -0.5466258 | -2.7174807 |
| H | -1.6368953 | -0.5575470 | 1.5736939  |
| H | -3.8367931 | -1.0136233 | -2.8480049 |
| H | -4.0439968 | -1.1176410 | 1.4460442  |
| H | -5.1585951 | -1.3240446 | -0.7659700 |
| F | 0.6898671  | -1.0445830 | -1.8742618 |
| F | 0.1539168  | 0.7700782  | 0.9372017  |

## Mes<sub>3</sub>P

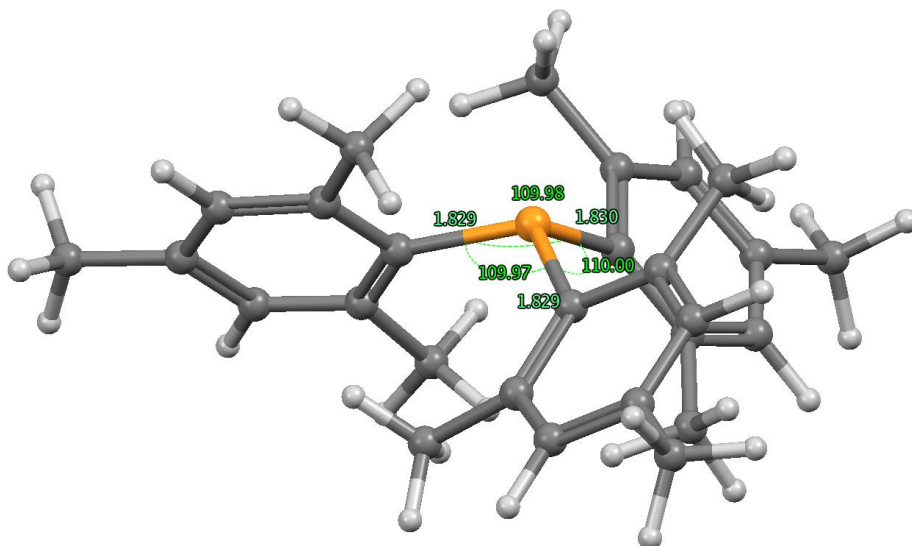

E(TPSS-D3/def2-TZVP) = -1390.828460454 (conv)

Lowest Freq. = 26.25 cm<sup>-1</sup>

61

PMes3 (014/c1/tpss-d3.def2-TZVP)

|   |            |            |            |
|---|------------|------------|------------|
| P | 0.1942997  | -0.2428554 | -0.8239117 |
| C | 1.3242559  | -1.1021056 | 0.3302302  |
| C | 1.5546064  | -2.4656200 | 0.0061228  |
| C | 2.0515379  | -0.5201018 | 1.3968534  |
| C | 2.9955803  | -1.2954575 | 2.0780187  |
| C | 2.4933131  | -3.2018409 | 0.7307592  |
| C | 3.2403573  | -2.6327176 | 1.7631804  |
| H | 3.5414699  | -0.8374183 | 2.9015349  |
| H | 2.6446374  | -4.2493689 | 0.4752298  |
| C | 0.4044335  | 1.5682274  | -0.6731520 |
| C | 1.5564902  | 2.0734183  | -1.3329207 |
| C | -0.5049810 | 2.4821749  | -0.0880439 |
| C | -0.2580409 | 3.8542205  | -0.2040910 |
| C | 1.7674588  | 3.4512057  | -1.4029637 |
| C | 0.8631709  | 4.3649137  | -0.8589860 |
| H | -0.9611675 | 4.5456424  | 0.2579644  |
| H | 2.6639698  | 3.8170315  | -1.9008908 |
| C | -1.5385830 | -0.7032473 | -0.4607738 |
| C | -2.0142127 | -1.3749107 | 0.6903875  |
| C | -2.4406242 | -0.4485831 | -1.5290417 |
| C | -3.7670794 | -0.8690761 | -1.4319208 |
| C | -3.3489154 | -1.7944364 | 0.7292426  |
| C | -4.2425547 | -1.5603515 | -0.3153830 |
| H | -4.4444190 | -0.6521432 | -2.2563903 |
| H | -3.7037160 | -2.3038475 | 1.6239211  |
| C | -2.0086025 | 0.3033791  | -2.7638351 |
| H | -2.8067645 | 0.3018473  | -3.5115762 |
| H | -1.1063486 | -0.1433032 | -3.1988508 |
| H | -1.7580322 | 1.3459513  | -2.5322870 |
| C | -1.1767997 | -1.6202466 | 1.9212036  |
| H | -0.5989876 | -0.7334082 | 2.1960691  |
| H | -0.4550387 | -2.4314519 | 1.7807362  |
| H | -1.8258537 | -1.8845159 | 2.7612823  |
| C | -5.6693047 | -2.0442895 | -0.2473061 |
| H | -5.7917107 | -2.9791278 | -0.8093271 |
| H | -6.3588112 | -1.3116870 | -0.6797686 |
| H | -5.9727185 | -2.2370546 | 0.7861188  |
| C | 2.5891836  | 1.1519602  | -1.9339877 |

|   |            |            |            |
|---|------------|------------|------------|
| H | 3.1079239  | 0.5713653  | -1.1611536 |
| H | 3.3366372  | 1.7252175  | -2.4897422 |
| H | 2.1201518  | 0.4236893  | -2.6066562 |
| C | -1.7116478 | 2.0621633  | 0.7142643  |
| H | -2.5262016 | 1.6942031  | 0.0820805  |
| H | -2.0860000 | 2.9140412  | 1.2896079  |
| H | -1.4682937 | 1.2547743  | 1.4105977  |
| C | 1.0828708  | 5.8515453  | -0.9852721 |
| H | 0.6114163  | 6.2392404  | -1.8976879 |
| H | 2.1492233  | 6.0921578  | -1.0390193 |
| H | 0.6479885  | 6.3902464  | -0.1374185 |
| C | 0.7796249  | -3.1590143 | -1.0871469 |
| H | 1.1775651  | -4.1628142 | -1.2609484 |
| H | 0.8237148  | -2.5868720 | -2.0217832 |
| H | -0.2827834 | -3.2516163 | -0.8297130 |
| C | 1.8278112  | 0.8880995  | 1.8901996  |
| H | 2.2557996  | 1.6392115  | 1.2184430  |
| H | 2.2883095  | 1.0107556  | 2.8749626  |
| H | 0.7619460  | 1.1179759  | 1.9759579  |
| C | 4.2842550  | -3.4296048 | 2.5045893  |
| H | 5.2727907  | -3.3001306 | 2.0451594  |
| H | 4.0519327  | -4.4989428 | 2.4896718  |
| H | 4.3634671  | -3.1064972 | 3.5475607  |

### Mes<sub>3</sub>P-SF<sub>6</sub>

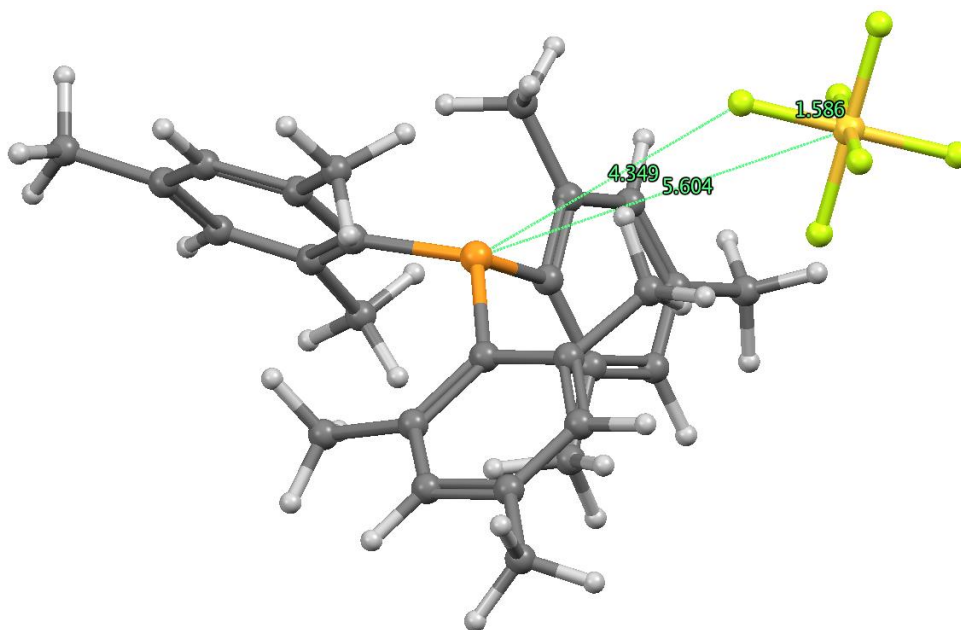

E(TPSS-D3/def2-TZVP) = -2388.381017313 (conv)

Lowest Freq. = 12.24 cm<sup>-1</sup>

68

PMes3-SF6 (015/c1/tpss-d3.def2-TZVP)

|   |            |            |            |
|---|------------|------------|------------|
| P | -0.4161413 | 0.0108795  | -0.5361269 |
| C | 0.8376572  | -0.9090268 | 0.4262597  |
| C | 0.9648698  | -2.2746640 | 0.0558033  |
| C | 1.7389913  | -0.3717383 | 1.3766938  |
| C | 2.7506810  | -1.1896397 | 1.8913591  |
| C | 1.9763795  | -3.0541594 | 0.6172585  |
| C | 2.8975832  | -2.5271944 | 1.5235303  |
| H | 3.4356639  | -0.7640702 | 2.6232277  |
| H | 2.0514491  | -4.1000485 | 0.3245297  |

|   |            |            |            |
|---|------------|------------|------------|
| C | -0.1622480 | 1.8151109  | -0.3634446 |
| C | 0.8861630  | 2.3336863  | -1.1701308 |
| C | -0.9697465 | 2.7168254  | 0.3702242  |
| C | -0.7329637 | 4.0910739  | 0.2521431  |
| C | 1.0932599  | 3.7114812  | -1.2385820 |
| C | 0.2831174  | 4.6145236  | -0.5471160 |
| H | -1.3563032 | 4.7730553  | 0.8284952  |
| H | 1.9097359  | 4.0860632  | -1.8538542 |
| C | -2.0919497 | -0.4353947 | 0.0452276  |
| C | -2.4190242 | -1.1268150 | 1.2362359  |
| C | -3.1250732 | -0.1424977 | -0.8848840 |
| C | -4.4330274 | -0.5490489 | -0.6190305 |
| C | -3.7421997 | -1.5309490 | 1.4453480  |
| C | -4.7641863 | -1.2622737 | 0.5347841  |
| H | -5.2122124 | -0.3027101 | -1.3385668 |
| H | -3.9816819 | -2.0553218 | 2.3692264  |
| F | 4.3449661  | -1.2401538 | -1.2598674 |
| S | 4.3731264  | -1.9706404 | -2.6671763 |
| F | 4.4096540  | -2.7030521 | -4.0800469 |
| F | 4.3509982  | -3.3838403 | -1.9381765 |
| F | 4.4016890  | -0.5594272 | -3.4013727 |
| F | 2.7877063  | -1.9647636 | -2.7139099 |
| F | 5.9654374  | -1.9793534 | -2.6283308 |
| C | 1.6409623  | 1.0326086  | 1.9195146  |
| H | 1.9805559  | 1.7846936  | 1.2000907  |
| H | 2.2550818  | 1.1226795  | 2.8203818  |
| H | 0.6097378  | 1.2910589  | 2.1764204  |
| C | 0.0104932  | -2.9216102 | -0.9166004 |
| H | 0.3583822  | -3.9229333 | -1.1855097 |
| H | -0.0889883 | -2.3181950 | -1.8271270 |
| H | -0.9969141 | -3.0106912 | -0.4919608 |
| C | 4.0274128  | -3.3665002 | 2.0636821  |
| H | 4.8955024  | -3.3242702 | 1.3927427  |
| H | 3.7348314  | -4.4173301 | 2.1544222  |
| H | 4.3530545  | -3.0103966 | 3.0459822  |
| C | 1.8167867  | 1.4224512  | -1.9301755 |
| H | 1.2543148  | 0.7115361  | -2.5471955 |
| H | 2.4309719  | 0.8230553  | -1.2481709 |
| H | 2.4863873  | 2.0032540  | -2.5707019 |
| C | -2.0480876 | 2.2822544  | 1.3318521  |
| H | -1.7120871 | 1.4544058  | 1.9622652  |
| H | -2.9516849 | 1.9380229  | 0.8184533  |
| H | -2.3232700 | 3.1201893  | 1.9791918  |
| C | 0.4930966  | 6.1029127  | -0.6688968 |
| H | -0.0082115 | 6.4957019  | -1.5629538 |
| H | 1.5564489  | 6.3485583  | -0.7564659 |
| H | 0.0853446  | 6.6325473  | 0.1975440  |
| C | -1.4274849 | -1.4096191 | 2.3376004  |
| H | -0.7541014 | -2.2370288 | 2.0907055  |
| H | -1.9617519 | -1.6692042 | 3.2563531  |
| H | -0.7930620 | -0.5419746 | 2.5392635  |
| C | -2.8518114 | 0.6364538  | -2.1480488 |
| H | -2.5593389 | 1.6702370  | -1.9264707 |
| H | -3.7422931 | 0.6617746  | -2.7824823 |
| H | -2.0212293 | 0.1927274  | -2.7102579 |
| C | -6.1745681 | -1.7358351 | 0.7815855  |
| H | -6.3529766 | -2.7015279 | 0.2909743  |
| H | -6.9074283 | -1.0266587 | 0.3835420  |
| H | -6.3664466 | -1.8692635 | 1.8507201  |



## Et<sub>3</sub>P

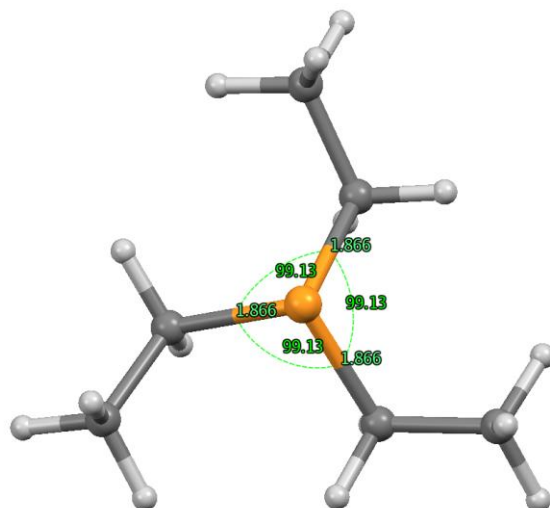

E(TPSS-D3/def2-TZVP) = -579.2193107818 (conv)

Lowest Freq. = 55.62 cm<sup>-1</sup>

22

PEt3 (016/c1/tpss-d3.def2-TZVP)

|   |            |            |            |
|---|------------|------------|------------|
| P | 0.1482642  | 0.0047831  | -0.0016999 |
| C | 1.0532754  | 1.3391071  | -0.9401702 |
| H | 2.1373839  | 1.1898308  | -0.8377676 |
| H | 0.8109901  | 2.2903261  | -0.4512561 |
| C | 0.9756194  | 0.1979054  | 1.6591818  |
| H | 2.0655716  | 0.2412961  | 1.5242505  |
| H | 0.7570193  | -0.7128337 | 2.2295448  |
| C | 1.0836854  | -1.4831801 | -0.6270837 |
| H | 2.1615558  | -1.3297926 | -0.4763523 |
| H | 0.9130344  | -1.5327864 | -1.7091947 |
| C | 0.6523477  | 1.4065968  | -2.4195346 |
| H | -0.4275249 | 1.5544909  | -2.5252482 |
| H | 0.9161712  | 0.4846207  | -2.9483548 |
| H | 1.1609226  | 2.2348584  | -2.9253043 |
| C | 0.6261093  | -2.7945240 | 0.0245840  |
| H | 0.8187613  | -2.7944570 | 1.1025926  |
| H | 1.1563586  | -3.6511930 | -0.4060194 |
| H | -0.4478736 | -2.9498297 | -0.1224165 |
| C | 0.4763161  | 1.4222150  | 2.4373203  |
| H | -0.6097249 | 1.3831462  | 2.5721230  |
| H | 0.7141373  | 2.3539491  | 1.9133512  |
| H | 0.9411389  | 1.4721525  | 3.4282246  |

## Et<sub>3</sub>P-SF<sub>6</sub>

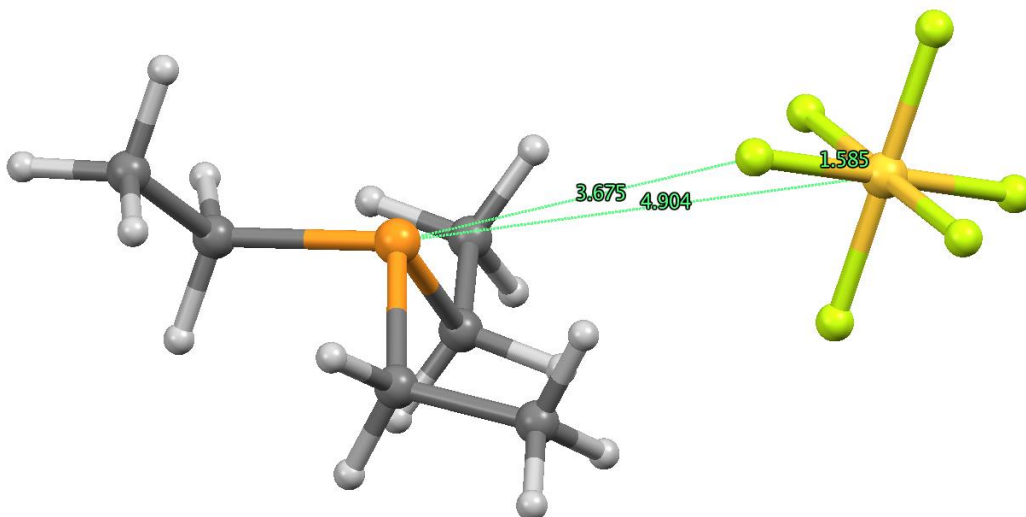

E(TPSS-D3/def2-TZVP) = -1576.769061660 (conv)

Lowest Freq. = 12.77 cm<sup>-1</sup>

29

PEt3-SF6 (017/c2/tpss-d3.def2-TZVP)

|   |            |            |            |
|---|------------|------------|------------|
| P | -0.6619011 | -0.0082367 | -0.7711103 |
| F | 3.7176156  | -0.9648726 | -1.1942201 |
| S | 3.5948221  | -1.5111117 | -2.6858896 |
| F | 3.4781442  | -2.0592352 | -4.1733852 |
| F | 4.9250355  | -2.3592947 | -2.4786199 |
| F | 2.2694314  | -0.6649784 | -2.8884620 |
| F | 2.7330986  | -2.7409319 | -2.1631721 |
| F | 4.4624097  | -0.2827636 | -3.2039197 |
| C | 0.3624902  | -0.8628195 | 0.5323950  |
| H | 0.1152192  | -0.4509159 | 1.5208702  |
| H | 1.4090779  | -0.6083520 | 0.3305881  |
| C | -0.2174963 | 1.7611582  | -0.3803467 |
| H | -0.9812022 | 2.3918478  | -0.8510755 |
| H | -0.2867810 | 1.9249691  | 0.7042523  |
| C | -2.3276397 | -0.0875964 | 0.0646869  |
| H | -2.5689688 | -1.1502228 | 0.1881940  |
| H | -2.2546899 | 0.3466871  | 1.0716386  |
| C | 0.1921937  | -2.3874221 | 0.5229368  |
| H | 0.8523070  | -2.8592224 | 1.2592449  |
| H | 0.4303977  | -2.8012144 | -0.4619921 |
| H | -0.8355149 | -2.6766195 | 0.7668419  |
| C | -3.4358593 | 0.5994052  | -0.7436400 |
| H | -4.4070363 | 0.4893568  | -0.2484514 |
| H | -3.5135441 | 0.1659690  | -1.7462520 |
| H | -3.2428033 | 1.6713932  | -0.8578639 |
| C | 1.1693607  | 2.1602233  | -0.9013936 |
| H | 1.3790596  | 3.2137203  | -0.6854025 |
| H | 1.2369592  | 2.0145574  | -1.9843513 |
| H | 1.9601244  | 1.5630941  | -0.4355276 |

## (2-OMe-C<sub>6</sub>H<sub>4</sub>)<sub>3</sub>P

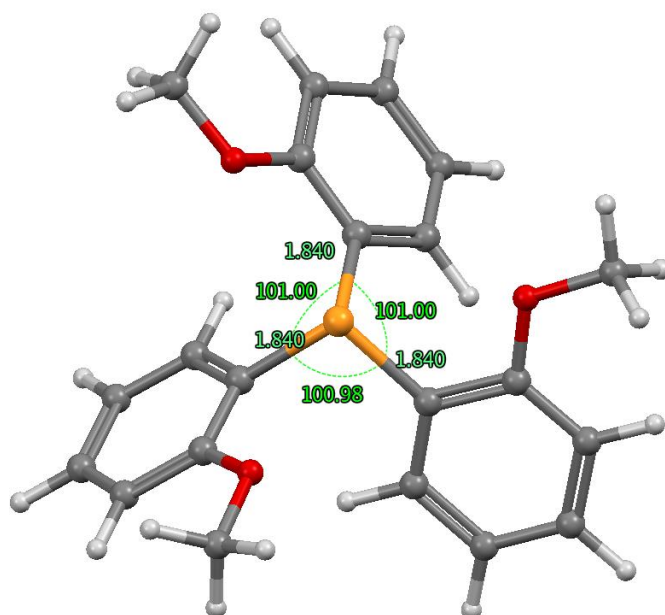

E(TPSS-D3/def2-TZVP) = -1380.548874095 (conv)

Lowest Freq. = 23.61 cm<sup>-1</sup>

46

P(oOMePh)<sub>3</sub> (020/c1/tpss-d3.def2-TZVP)

|   |            |            |            |
|---|------------|------------|------------|
| P | 0.2835248  | -0.4243899 | -1.4294559 |
| C | 1.3525911  | -1.1165525 | -0.1019487 |
| C | 1.5611392  | -2.5129705 | -0.0926535 |
| C | 2.0393923  | -0.3445793 | 0.8375795  |
| C | 2.9156699  | -0.9249158 | 1.7577308  |
| C | 2.4294061  | -3.1058950 | 0.8276881  |
| C | 3.1075909  | -2.3034800 | 1.7488411  |
| H | 3.4370960  | -0.3015997 | 2.4781749  |
| H | 2.5811827  | -4.1795805 | 0.8334426  |
| C | 0.3896427  | 1.3750945  | -1.0623985 |
| C | 1.5510855  | 2.0598019  | -1.4817232 |
| C | -0.6369217 | 2.1211443  | -0.4793720 |
| C | -0.5321657 | 3.5048379  | -0.3188585 |
| C | 1.6704370  | 3.4426211  | -1.3201956 |
| C | 0.6211098  | 4.1603215  | -0.7404116 |
| H | -1.3450509 | 4.0612432  | 0.1383979  |
| H | 2.5669796  | 3.9620171  | -1.6402151 |
| C | -1.3895812 | -0.8184211 | -0.7740122 |
| C | -1.6253446 | -1.5130331 | 0.4143507  |
| C | -2.5018827 | -0.4737823 | -1.5725897 |
| C | -3.8001342 | -0.8175416 | -1.1868335 |
| C | -2.9179468 | -1.8684530 | 0.8070581  |
| C | -4.0004164 | -1.5193395 | 0.0047070  |
| H | -4.6507930 | -0.5459059 | -1.8020426 |
| H | -3.0736775 | -2.4080255 | 1.7365935  |
| O | -2.2048697 | 0.2234165  | -2.7125036 |
| O | 2.5271953  | 1.2689643  | -2.0249054 |
| O | 0.8428445  | -3.2136794 | -1.0236362 |
| H | -5.0115725 | -1.7857107 | 0.3000554  |
| H | -0.7799188 | -1.7754771 | 1.0432000  |
| H | 1.8800144  | 0.7294388  | 0.8489110  |
| H | 3.7836717  | -2.7685516 | 2.4610512  |
| H | -1.5313124 | 1.6058940  | -0.1422192 |
| H | 0.7173362  | 5.2357167  | -0.6184989 |

|   |            |            |            |
|---|------------|------------|------------|
| C | -3.2859156 | 0.6224024  | -3.5550028 |
| H | -3.9718312 | 1.2923119  | -3.0212815 |
| H | -3.8373820 | -0.2497366 | -3.9282587 |
| H | -2.8241322 | 1.1529827  | -4.3879535 |
| C | 3.7363081  | 1.8953533  | -2.4528518 |
| H | 3.5403768  | 2.6332816  | -3.2409861 |
| H | 4.3571422  | 1.0898402  | -2.8456236 |
| H | 4.2453396  | 2.3807815  | -1.6106285 |
| C | 0.9925748  | -4.6328805 | -1.0566083 |
| H | 0.3408826  | -4.9748555 | -1.8609392 |
| H | 0.6779854  | -5.0822123 | -0.1062081 |
| H | 2.0308157  | -4.9146790 | -1.2725888 |

**(2-OMe-C<sub>6</sub>H<sub>4</sub>)<sub>3</sub>P-SF<sub>6</sub>**

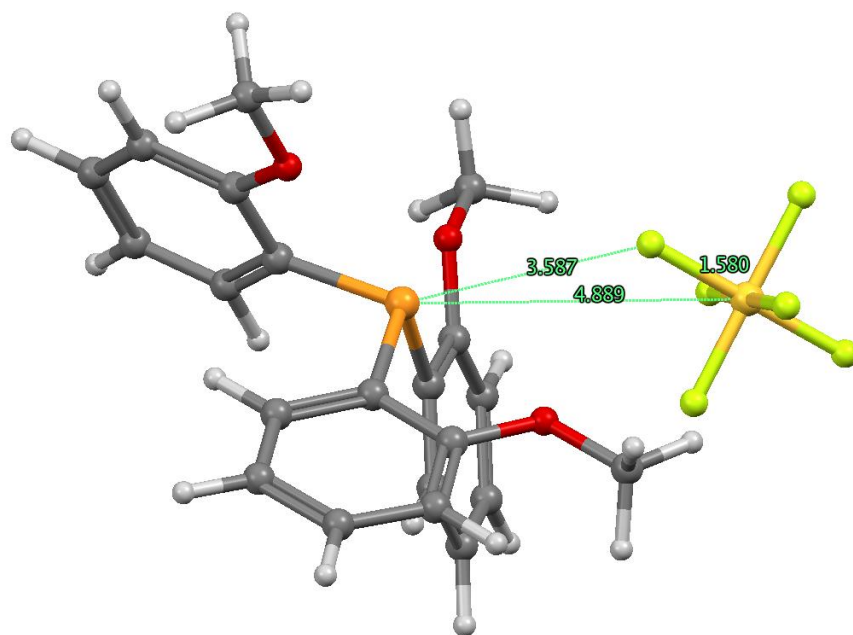

E(TPSS-D3/def2-TZVP) = -2378.101863743 (conv)

Lowest Freq. = 11.51 cm<sup>-1</sup>

53

P(oOMePh)<sub>3</sub>-SF<sub>6</sub> (021/c1/tpss-d3.def2-TZVP)

|   |            |            |            |
|---|------------|------------|------------|
| P | -0.2564029 | -0.1235448 | -1.0863655 |
| C | 0.9247500  | -0.8641761 | 0.1121672  |
| C | 1.1056273  | -2.2641637 | 0.0730401  |
| C | 1.7279235  | -0.1235757 | 0.9823382  |
| C | 2.6900132  | -0.7382164 | 1.7870505  |
| C | 2.0555407  | -2.8913213 | 0.8825576  |
| C | 2.8499874  | -2.1199226 | 1.7343246  |
| H | 3.3025973  | -0.1387986 | 2.4539997  |
| H | 2.1860791  | -3.9672591 | 0.8500608  |
| C | -0.1538663 | 1.6577156  | -0.6363082 |
| C | 0.9416667  | 2.4028798  | -1.1244244 |
| C | -1.1410602 | 2.3374188  | 0.0814026  |
| C | -1.0623869 | 3.7129915  | 0.3092110  |
| C | 1.0343567  | 3.7788393  | -0.8966982 |
| C | 0.0255888  | 4.4288420  | -0.1816507 |
| H | -1.8435256 | 4.2154652  | 0.8720077  |
| H | 1.8797963  | 4.3457262  | -1.2700955 |
| C | -1.8689518 | -0.5795551 | -0.3279959 |
| C | -2.0058270 | -1.3174940 | 0.8495217  |
| C | -3.0416224 | -0.2302106 | -1.0323089 |

|   |            |            |            |
|---|------------|------------|------------|
| C | -4.3022474 | -0.6156705 | -0.5686372 |
| C | -3.2599352 | -1.7136492 | 1.3200018  |
| C | -4.4033117 | -1.3622412 | 0.6080536  |
| H | -5.1997216 | -0.3410953 | -1.1117814 |
| H | -3.3387455 | -2.2869394 | 2.2390111  |
| F | 3.9339878  | -1.0930043 | -1.8414059 |
| S | 3.7674410  | -2.0082239 | -3.1246885 |
| F | 3.6165891  | -2.9290524 | -4.4164276 |
| F | 3.5995962  | -3.2904794 | -2.1963618 |
| F | 3.9521237  | -0.7322878 | -4.0634096 |
| F | 2.2052902  | -1.7751950 | -3.1050867 |
| F | 5.3440208  | -2.2459052 | -3.1537945 |
| O | 0.2824928  | -2.9313103 | -0.7935183 |
| O | 1.8872384  | 1.6806143  | -1.8021051 |
| O | -2.8405447 | 0.5153798  | -2.1622742 |
| H | -5.3854026 | -1.6614640 | 0.9638249  |
| H | -1.1126915 | -1.5824988 | 1.4073401  |
| H | -1.9843219 | 1.7750159  | 0.4707317  |
| H | 0.1024716  | 5.4989134  | -0.0095696 |
| H | 1.5927333  | 0.9526181  | 1.0310870  |
| H | 3.5914335  | -2.6113075 | 2.3582599  |
| C | 3.0285647  | 2.3810550  | -2.2992367 |
| H | 3.5907426  | 2.8442679  | -1.4786729 |
| H | 2.7328508  | 3.1495521  | -3.0243421 |
| H | 3.6435502  | 1.6271199  | -2.7886072 |
| C | 0.3873012  | -4.3537874 | -0.8598500 |
| H | 1.3888966  | -4.6606882 | -1.1842121 |
| H | -0.3528082 | -4.6644650 | -1.5975982 |
| H | 0.1574473  | -4.8080074 | 0.1121192  |
| C | -3.9861483 | 0.9173659  | -2.9130791 |
| H | -4.6480001 | 1.5506289  | -2.3090172 |
| H | -4.5426244 | 0.0456952  | -3.2799885 |
| H | -3.5951878 | 1.4884492  | -3.7554804 |

### (4-OMe-C<sub>6</sub>H<sub>4</sub>)<sub>3</sub>P

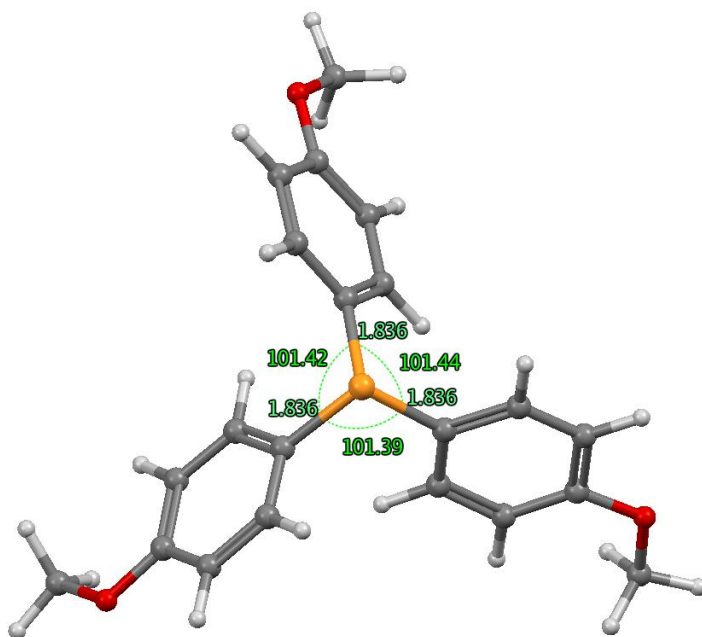

E(TPSS-D3/def2-TZVP) = -1380.548337127 (conv)

Lowest Freq. = 20.64 cm<sup>-1</sup>

46

P(pOMePh)<sub>3</sub> (022/c1/tpss-d3.def2-TZVP)

|   |            |            |            |
|---|------------|------------|------------|
| P | 0.3380420  | -0.4093530 | -1.4912579 |
| C | 1.4106055  | -1.1335571 | -0.1885601 |
| C | 1.7846167  | -2.4838661 | -0.3212402 |
| C | 1.8891980  | -0.4263540 | 0.9181002  |
| C | 2.7082091  | -1.0341282 | 1.8733042  |
| C | 2.5833982  | -3.1072564 | 0.6252687  |
| C | 3.0531059  | -2.3820579 | 1.7303545  |
| H | 1.6235357  | 0.6194743  | 1.0417018  |
| H | 1.4378266  | -3.0514436 | -1.1818191 |
| H | 3.0656241  | -0.4521119 | 2.7156057  |
| H | 2.8685839  | -4.1501074 | 0.5249096  |
| C | 0.4231069  | 1.3780213  | -1.0790828 |
| C | 1.4848688  | 2.1269246  | -1.6200066 |
| C | -0.5047729 | 2.0436004  | -0.2729241 |
| C | -0.3866792 | 3.4089295  | 0.0000420  |
| C | 1.6263854  | 3.4788907  | -1.3466834 |
| C | 0.6863189  | 4.1297864  | -0.5340697 |
| H | -1.3388133 | 1.4924558  | 0.1516921  |
| H | 2.2116446  | 1.6350750  | -2.2625740 |
| H | -1.1288086 | 3.8927365  | 0.6254899  |
| H | 2.4480169  | 4.0556758  | -1.7604682 |
| C | -1.3339331 | -0.8463089 | -0.8708163 |
| C | -1.5902328 | -1.3549048 | 0.4057564  |
| C | -2.4251347 | -0.6663596 | -1.7412050 |
| C | -3.7208537 | -0.9586324 | -1.3432093 |
| C | -2.8876134 | -1.6699637 | 0.8180750  |
| C | -3.9593372 | -1.4656141 | -0.0571955 |
| H | -2.2495921 | -0.2875441 | -2.7455264 |
| H | -0.7659934 | -1.5122884 | 1.0953057  |
| H | -4.5632110 | -0.8158000 | -2.0132694 |
| H | -3.0476286 | -2.0681138 | 1.8139922  |
| O | 3.8457618  | -3.0753944 | 2.6057069  |
| O | 0.8991592  | 5.4668753  | -0.3291197 |
| O | -5.2675001 | -1.7353708 | 0.2445167  |
| C | 4.3508678  | -2.3606939 | 3.7360575  |
| H | 4.9504559  | -3.0813003 | 4.2930138  |
| H | 3.5321933  | -1.9919026 | 4.3669355  |
| H | 4.9794876  | -1.5185858 | 3.4204784  |
| C | -5.5426506 | -2.2633040 | 1.5442087  |
| H | -5.0346789 | -3.2242305 | 1.6943627  |
| H | -6.6230283 | -2.4068987 | 1.5783274  |
| H | -5.2363980 | -1.5592929 | 2.3283245  |
| C | -0.0484307 | 6.1617250  | 0.4851205  |
| H | 0.2973413  | 7.1953368  | 0.5180966  |
| H | -0.0750661 | 5.7460397  | 1.5003510  |
| H | -1.0522943 | 6.1192317  | 0.0442089  |

# (4-OMe-C<sub>6</sub>H<sub>4</sub>)<sub>3</sub>P-SF<sub>6</sub>

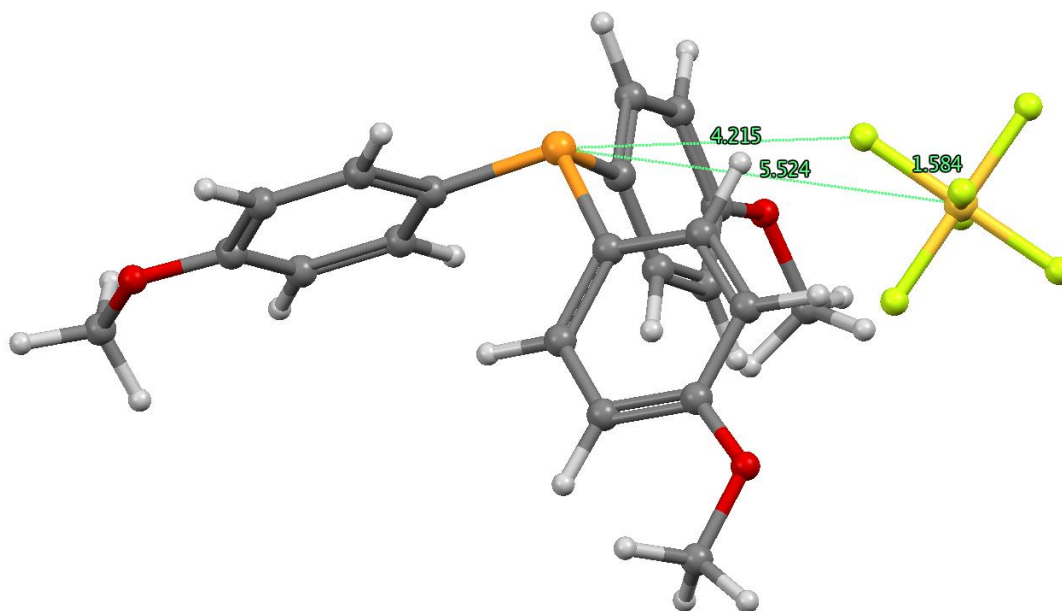

E(TPSS-D3/def2-TZVP) = -2378.100767722 (conv)

Lowest Freq. = 3.35 cm<sup>-1</sup>

53

P(pOMePh)<sub>3</sub>-SF<sub>6</sub> (023/c1/tpss-d3.def2-TZVP)

|   |            |            |            |
|---|------------|------------|------------|
| P | -1.0833341 | -0.5334827 | -1.1023451 |
| C | 0.1888764  | -1.3218436 | -0.0387769 |
| C | 0.5454724  | -2.6553566 | -0.3071359 |
| C | 0.8516840  | -0.6616431 | 1.0007482  |
| C | 1.8406414  | -1.2959507 | 1.7538617  |
| C | 1.5202483  | -3.3049206 | 0.4365755  |
| C | 2.1805986  | -2.6231132 | 1.4684822  |
| H | 0.6070853  | 0.3739264  | 1.2192895  |
| H | 0.0538537  | -3.1843589 | -1.1201873 |
| H | 2.3438541  | -0.7475929 | 2.5424236  |
| H | 1.8008405  | -4.3323374 | 0.2254258  |
| C | -0.6774290 | 1.2425627  | -0.8654086 |
| C | 0.3236883  | 1.7967749  | -1.6845175 |
| C | -1.2920722 | 2.0754901  | 0.0737588  |
| C | -0.9222876 | 3.4162787  | 0.2110347  |
| C | 0.7145594  | 3.1199053  | -1.5506907 |
| C | 0.0903246  | 3.9400138  | -0.5992084 |
| H | -2.0748024 | 1.6770979  | 0.7129467  |
| H | 0.8051703  | 1.1733390  | -2.4341203 |
| H | -1.4243555 | 4.0339416  | 0.9475302  |
| H | 1.4934481  | 3.5438693  | -2.1771359 |
| C | -2.5972528 | -0.6989660 | -0.0779551 |
| C | -2.6163597 | -1.2076308 | 1.2233518  |
| C | -3.8227397 | -0.3120435 | -0.6532161 |
| C | -5.0119787 | -0.4041669 | 0.0530071  |
| C | -3.8086558 | -1.3239388 | 1.9436594  |
| C | -5.0113788 | -0.9147816 | 1.3597693  |
| H | -3.8375128 | 0.0719872  | -1.6707781 |
| H | -1.6875947 | -1.5223032 | 1.6899579  |
| H | -5.9558726 | -0.0996811 | -0.3889558 |
| H | -3.7849190 | -1.7284436 | 2.9495361  |
| F | 3.5580691  | 1.0806503  | -0.1183869 |
| S | 4.3751413  | 0.3018587  | -1.2333100 |
| F | 5.2043646  | -0.4721707 | -2.3496395 |

|   |            |            |            |
|---|------------|------------|------------|
| F | 4.8491027  | -0.7615667 | -0.1473785 |
| F | 3.9119762  | 1.3684189  | -2.3206907 |
| F | 3.1060897  | -0.5878336 | -1.5586865 |
| F | 5.6558474  | 1.1938119  | -0.9111646 |
| O | 3.1481384  | -3.3307079 | 2.1289972  |
| O | 0.5340152  | 5.2344917  | -0.5443741 |
| O | -6.2331349 | -0.9793724 | 1.9752439  |
| C | -6.2677604 | -1.5061980 | 3.3036628  |
| H | -5.9068868 | -2.5421970 | 3.3258524  |
| H | -7.3155602 | -1.4732541 | 3.6036903  |
| H | -5.6661206 | -0.8928620 | 3.9864227  |
| C | -0.0897189 | 6.0987517  | 0.4081516  |
| H | 0.3992982  | 7.0660416  | 0.2889709  |
| H | 0.0593024  | 5.7304808  | 1.4311087  |
| H | -1.1637206 | 6.1974616  | 0.2061886  |
| C | 3.8677057  | -2.6489778 | 3.1598033  |
| H | 4.5890868  | -3.3730652 | 3.5395177  |
| H | 3.1955779  | -2.3353615 | 3.9684535  |
| H | 4.3940310  | -1.7742076 | 2.7581324  |



Optimized (CAM-B3LYP/def2-SVP) structure of the conical intersection of Ph<sub>3</sub>P-SF<sub>6</sub> (S<sub>0</sub>/S<sub>1</sub>)

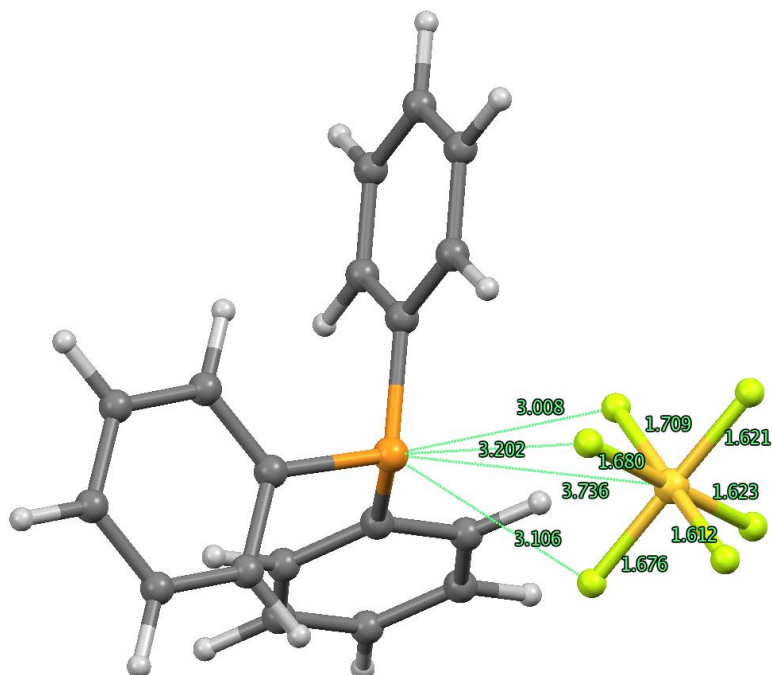

41

Coordinates from ORCA-job orca

|   |                   |                   |                   |
|---|-------------------|-------------------|-------------------|
| P | -0.14881013889931 | -0.16775076417422 | -0.41853810734622 |
| C | 0.84389284587418  | -0.92526324297377 | 0.89171446554333  |
| C | 1.28552443394731  | -2.24029642281345 | 0.70355552843586  |
| C | 1.17565458970153  | -0.23934520669622 | 2.06525260927899  |
| C | 1.91401453141374  | -0.87793852278580 | 3.05605582519293  |
| C | 2.02011658732727  | -2.87325409545541 | 1.69986263600420  |
| C | 2.33195076991780  | -2.19481644364137 | 2.87599484988765  |
| H | 0.85045823813418  | 0.79313299394786  | 2.20548328852378  |
| H | 1.07674258549537  | -2.75009256296263 | -0.23842156581894 |
| H | 2.16617868209493  | -0.34324944904547 | 3.97399859629075  |
| H | 2.36553052206163  | -3.89764583120175 | 1.54957369569373  |
| H | 2.91434384761901  | -2.69222031632708 | 3.65448524869842  |
| C | 0.05400883937385  | 1.62564081007536  | -0.27970258820056 |
| C | 1.26659149304723  | 2.17473363568836  | -0.72527966659934 |
| C | -0.94660562724615 | 2.47007399820207  | 0.21900048489840  |
| C | -0.72843339974732 | 3.84184436587059  | 0.28954108930501  |
| C | 1.47587608214569  | 3.54607624945904  | -0.64772598747325 |
| C | 0.48162286625805  | 4.38107546067155  | -0.14170831498187 |
| H | -1.89448200718096 | 2.05347812237826  | 0.56233360249541  |
| H | 2.03541273582586  | 1.52205345040355  | -1.13734836490757 |
| H | -1.50879220539389 | 4.49356176911442  | 0.68767575884867  |
| H | 2.42153639964177  | 3.96638795886248  | -0.99484451860307 |
| H | 0.64916295904549  | 5.45881899998847  | -0.08648476615340 |
| C | -1.88205045356027 | -0.53857713761062 | -0.05290951094576 |
| C | -2.27735779043888 | -1.29210965979171 | 1.05883897633857  |
| C | -2.85223079777112 | -0.10401087115650 | -0.96919249597676 |
| C | -4.19458273351710 | -0.39011931031362 | -0.75738634985494 |
| C | -3.62298653156399 | -1.58362317263658 | 1.26059492737640  |
| C | -4.58222496772458 | -1.13212310989243 | 0.35784963616418  |
| H | -2.54914082723654 | 0.46083851478028  | -1.85410680861243 |
| H | -1.53045081086901 | -1.64323820466400 | 1.77199115752245  |
| H | -4.94258362753520 | -0.04228159656691 | -1.47236520015825 |
| H | -3.92433101887241 | -2.16579733711203 | 2.13370082461401  |

|   |                   |                   |                   |
|---|-------------------|-------------------|-------------------|
| H | -5.63673246646003 | -1.36435035639162 | 0.51968517209344  |
| F | 2.61954155620592  | -0.60892130290471 | -1.50893698329789 |
| S | 2.27349215197627  | -1.05097577134996 | -3.12275004815758 |
| F | 1.96073604053325  | -1.46962409610426 | -4.64811156328985 |
| F | 3.39688639389094  | -2.21496158096030 | -3.02274228370818 |
| F | 1.12485884427576  | 0.16431644475200  | -3.23179295518624 |
| F | 1.11516024004759  | -2.14767618788507 | -2.59424035874317 |
| F | 3.40250116816204  | -0.00177022077678 | -3.63259993519088 |

## TD-DT calculated electronic excitations of phosphines and R<sub>3</sub>P-SF<sub>6</sub> complexes

Only excitations with  $\lambda > 260$  nm are reported here.

### TD-DFT calculated electronic excitations of Ph<sub>3</sub>P

#### Excited States:

|              |                           |          |                          |             | Assignment |
|--------------|---------------------------|----------|--------------------------|-------------|------------|
| STATE 1: E=  | 0.156076 au               | 4.247 eV | 34254.7 cm <sup>-1</sup> |             |            |
| 62a -> 69a : | 0.010475 (c= 0.10234560)  |          |                          |             |            |
| 68a -> 69a : | 0.945081 (c= 0.97215269)  |          |                          | n(P)→π*(Ar) |            |
| 68a -> 70a : | 0.013722 (c= 0.11714164)  |          |                          |             |            |
| STATE 2: E=  | 0.156522 au               | 4.259 eV | 34352.7 cm <sup>-1</sup> |             |            |
| 62a -> 70a : | 0.010573 (c= -0.10282343) |          |                          |             |            |
| 68a -> 69a : | 0.013210 (c= 0.11493275)  |          |                          |             |            |
| 68a -> 70a : | 0.942501 (c= -0.97082506) |          |                          | n(P)→π*(Ar) |            |
| STATE 3: E=  | 0.158540 au               | 4.314 eV | 34795.5 cm <sup>-1</sup> |             |            |
| 66a -> 69a : | 0.018442 (c= 0.13580163)  |          |                          |             |            |
| 67a -> 70a : | 0.016904 (c= -0.13001483) |          |                          |             |            |
| 68a -> 71a : | 0.929061 (c= -0.96387797) |          |                          | n(P)→π*(Ar) |            |

#### UV/VIS Absorptions:

| State | Energy<br>(cm <sup>-1</sup> ) | Wavelength<br>(nm) | fosc<br>(au <sup>**2</sup> ) | T2<br>(au) | TX<br>(au) | TY<br>(au) | TZ       |
|-------|-------------------------------|--------------------|------------------------------|------------|------------|------------|----------|
| 1     | 34254.7                       | 291.9              | 0.129522972                  | 1.24481    | 0.20559    | -1.03897   | 0.35084  |
| 2     | 34352.7                       | 291.1              | 0.130001320                  | 1.24584    | 1.07059    | 0.26772    | 0.16735  |
| 3     | 34795.5                       | 287.4              | 0.002728884                  | 0.02582    | -0.09845   | 0.00608    | -0.12685 |

## TD-DFT calculated electronic excitations of Ph<sub>3</sub>P-SF<sub>6</sub>

### Excited States:

### Assignment

|                                                                                                                                                                                                                                                                                              |                                                                                        |
|----------------------------------------------------------------------------------------------------------------------------------------------------------------------------------------------------------------------------------------------------------------------------------------------|----------------------------------------------------------------------------------------|
| STATE 1: E= 0.086861 au    2.364 eV    19063.8 cm <sup>**</sup> -1<br>103a -> 104a : 0.996184 (c= 0.99809010)                                                                                                                                                                                | n(P)→σ*(SF <sub>6</sub> )                                                              |
| STATE 2: E= 0.122171 au    3.324 eV    26813.4 cm <sup>**</sup> -1<br>98a -> 104a : 0.023659 (c= 0.15381435)<br>99a -> 104a : 0.052547 (c= 0.22923049)<br>101a -> 104a : 0.153617 (c= 0.39194007)<br>102a -> 104a : 0.768874 (c= 0.87685461)                                                 | π(Ar)→σ*(SF <sub>6</sub> )<br>π(Ar)→σ*(SF <sub>6</sub> )                               |
| STATE 3: E= 0.126557 au    3.444 eV    27776.1 cm <sup>**</sup> -1<br>99a -> 104a : 0.017426 (c= 0.13200796)<br>100a -> 104a : 0.111794 (c= -0.33435600)<br>101a -> 104a : 0.737662 (c= -0.85887254)<br>102a -> 104a : 0.118302 (c= 0.34394993)                                              | π(Ar)→σ*(SF <sub>6</sub> )<br>π(Ar)→σ*(SF <sub>6</sub> )<br>π(Ar)→σ*(SF <sub>6</sub> ) |
| STATE 4: E= 0.155252 au    4.225 eV    34073.9 cm <sup>**</sup> -1<br>103a -> 105a : 0.947834 (c= -0.97356770)<br>103a -> 107a : 0.011641 (c= -0.10789461)                                                                                                                                   | n(P)→π*(Ar)                                                                            |
| STATE 5: E= 0.157553 au    4.287 eV    34578.9 cm <sup>**</sup> -1<br>103a -> 106a : 0.808694 (c= 0.89927413)<br>103a -> 107a : 0.126354 (c= -0.35546344)                                                                                                                                    | n(P)→π*(Ar)                                                                            |
| STATE 6: E= 0.153412 au    4.175 eV    33670.1 cm <sup>**</sup> -1<br>98a -> 104a : 0.100783 (c= -0.31746364)<br>100a -> 104a : 0.393900 (c= -0.62761428)<br>101a -> 104a : 0.047213 (c= 0.21728543)<br>103a -> 106a : 0.035771 (c= -0.18913248)<br>103a -> 107a : 0.385718 (c= -0.62106179) | π(Ar)→σ*(SF <sub>6</sub> )<br><br>n(P)→π*(Ar)                                          |
| STATE 7: E= 0.156473 au    4.258 eV    34341.9 cm <sup>**</sup> -1<br>98a -> 104a : 0.072487 (c= -0.26923498)<br>100a -> 104a : 0.334782 (c= -0.57860327)<br>101a -> 104a : 0.031304 (c= 0.17692997)<br>103a -> 106a : 0.108502 (c= 0.32939610)<br>103a -> 107a : 0.412003 (c= 0.64187448)   | π(Ar)→σ*(SF <sub>6</sub> )<br><br>n(P)→π*(Ar)<br>n(P)→π*(Ar)                           |
| STATE 8: E= 0.127289 au    3.464 eV    27936.6 cm <sup>**</sup> -1<br>97a -> 104a : 0.011998 (c= 0.10953427)<br>98a -> 104a : 0.011513 (c= -0.10729887)<br>99a -> 104a : 0.868155 (c= -0.93174832)<br>100a -> 104a : 0.010575 (c= 0.10283325)<br>102a -> 104a : 0.087949 (c= 0.29656224)     | π(Ar)→σ*(SF <sub>6</sub> )                                                             |
| STATE 9: E= 0.124444 au    3.386 eV    27312.2 cm <sup>**</sup> -1<br>98a -> 104a : 0.783139 (c= -0.88495144)<br>99a -> 104a : 0.039307 (c= 0.19826032)<br>100a -> 104a : 0.136511 (c= 0.36947363)<br>101a -> 104a : 0.015597 (c= -0.12488830)<br>102a -> 104a : 0.023556 (c= 0.15347911)    | π(Ar)→σ*(SF <sub>6</sub> )<br>π(Ar)→σ*(SF <sub>6</sub> )<br>π(Ar)→σ*(SF <sub>6</sub> ) |

UV/VIS Absorptions:

| State | Energy<br>(cm <sup>-1</sup> ) | Wavelength<br>(nm) | fosc<br>(au**2) | T2<br>(au) | TX<br>(au) | TY<br>(au) | TZ       | $\pi(\text{Ar}) \rightarrow \pi^*(\text{Ar})$ |
|-------|-------------------------------|--------------------|-----------------|------------|------------|------------|----------|-----------------------------------------------|
| 1     | 19063.8                       | 524.6              | 0.000606085     | 0.01047    | 0.08003    | -0.01820   | -0.06108 |                                               |
| 2     | 26813.4                       | 372.9              | 0.000098217     | 0.00121    | 0.02044    | 0.02206    | 0.01736  |                                               |
| 3     | 27776.1                       | 360.0              | 0.000450328     | 0.00534    | -0.02377   | 0.03026    | 0.06211  |                                               |
| 4     | 34073.9                       | 293.5              | 0.105510946     | 1.01941    | -0.48601   | -0.85580   | 0.22543  |                                               |
| 5     | 34578.9                       | 289.2              | 0.095445249     | 0.90870    | -0.71639   | 0.60464    | -0.17289 |                                               |
| 6     | 33670.1                       | 297.0              | 0.017871055     | 0.17474    | 0.40242    | 0.02293    | 0.11075  |                                               |
| 7     | 34341.9                       | 291.2              | 0.042748337     | 0.40980    | -0.62638   | 0.08112    | -0.10422 |                                               |
| 8     | 27936.6                       | 358.0              | 0.000883155     | 0.01041    | 0.08892    | -0.00938   | -0.04912 |                                               |
| 9     | 27312.2                       | 366.1              | 0.000092286     | 0.00111    | -0.03062   | -0.01256   | -0.00413 |                                               |

## TD-DFT calculated electronic excitations of Mes<sub>3</sub>P

### Excited States:

|                |                                                  | Assignment  |
|----------------|--------------------------------------------------|-------------|
| STATE 1: E=    | 0.135169 au 3.678 eV 29666.2 cm <sup>**</sup> -1 |             |
| 104a -> 105a : | 0.962056 (c= -0.98084464)                        | n(P)→π*(Ar) |
| STATE 2: E=    | 0.135454 au 3.686 eV 29728.6 cm <sup>**</sup> -1 |             |
| 104a -> 106a : | 0.962327 (c= 0.98098290)                         | n(P)→π*(Ar) |
| STATE 3: E=    | 0.153152 au 4.167 eV 33613.1 cm <sup>**</sup> -1 |             |
| 100a -> 106a : | 0.031675 (c= 0.17797333)                         |             |
| 101a -> 106a : | 0.011474 (c= 0.10711807)                         |             |
| 104a -> 107a : | 0.876175 (c= 0.93604195)                         | n(P)→π*(Ar) |
| 104a -> 109a : | 0.015748 (c= 0.12549223)                         |             |
| 104a -> 110a : | 0.022069 (c= 0.14855766)                         |             |
| STATE 4: E=    | 0.150769 au 4.103 eV 33090.0 cm <sup>**</sup> -1 |             |
| 99a -> 105a :  | 0.019434 (c= -0.13940583)                        |             |
| 102a -> 105a : | 0.011216 (c= 0.10590399)                         |             |
| 103a -> 105a : | 0.030142 (c= -0.17361545)                        |             |
| 104a -> 108a : | 0.891971 (c= -0.94444212)                        | n(P)→π*(Ar) |
| 104a -> 109a : | 0.010361 (c= 0.10178863)                         |             |
| STATE 5: E=    | 0.154576 au 4.206 eV 33925.4 cm <sup>**</sup> -1 |             |
| 103a -> 106a : | 0.034383 (c= -0.18542778)                        |             |
| 104a -> 107a : | 0.016351 (c= 0.12786909)                         |             |
| 104a -> 109a : | 0.886769 (c= -0.94168393)                        | n(P)→π*(Ar) |
| STATE 6: E=    | 0.170840 au 4.649 eV 37495.0 cm <sup>**</sup> -1 |             |
| 101a -> 105a : | 0.054621 (c= -0.23371156)                        |             |
| 102a -> 106a : | 0.047213 (c= 0.21728629)                         |             |
| 104a -> 107a : | 0.024764 (c= -0.15736728)                        |             |
| 104a -> 110a : | 0.830516 (c= 0.91132643)                         | n(P)→π*(Ar) |

### UV/VIS Absorptions:

| State | Energy<br>(cm <sup>-1</sup> ) | Wavelength<br>(nm) | fosc<br>(au <sup>**2</sup> ) | T2<br>(au) | TX<br>(au) | TY<br>(au) | TZ       |
|-------|-------------------------------|--------------------|------------------------------|------------|------------|------------|----------|
| 1     | 29666.2                       | 337.1              | 0.213041391                  | 2.36416    | 0.33146    | 1.45880    | -0.35524 |
| 2     | 29728.6                       | 336.4              | 0.215237636                  | 2.38352    | -1.46998   | 0.23401    | -0.40978 |
| 3     | 33613.1                       | 297.5              | 0.003164218                  | 0.03099    | 0.13081    | 0.03074    | -0.11374 |
| 4     | 33090.0                       | 302.2              | 0.006847765                  | 0.06813    | -0.23000   | 0.02762    | -0.12028 |
| 5     | 33925.4                       | 294.8              | 0.008486695                  | 0.08235    | 0.02353    | 0.28533    | -0.01974 |
| 6     | 37495.0                       | 266.7              | 0.012839860                  | 0.11274    | 0.06762    | -0.08312   | -0.31820 |

## TD-DFT calculated electronic excitations of Mes<sub>3</sub>P-SF<sub>6</sub>

### Excited States:

### Assignment

|                                                                                                                                                                                                                                           |                            |
|-------------------------------------------------------------------------------------------------------------------------------------------------------------------------------------------------------------------------------------------|----------------------------|
| STATE 1: E= 0.084370 au 2.296 eV 18517.0 cm <sup>-1</sup><br>139a -> 140a : 0.997153 (c= 0.99857554)                                                                                                                                      | n(P)→σ*(SF <sub>6</sub> )  |
| STATE 2: E= 0.124188 au 3.379 eV 27256.1 cm <sup>-1</sup><br>134a -> 140a : 0.017994 (c= -0.13414326)<br>135a -> 140a : 0.078256 (c= -0.27974351)<br>136a -> 140a : 0.054391 (c= -0.23321937)<br>138a -> 140a : 0.847227 (c= 0.92044944)  | π(Ar)→σ*(SF <sub>6</sub> ) |
| STATE 3: E= 0.130439 au 3.549 eV 28628.0 cm <sup>-1</sup><br>133a -> 140a : 0.015422 (c= 0.12418533)<br>134a -> 140a : 0.030723 (c= -0.17527887)<br>137a -> 140a : 0.922657 (c= 0.96055019)                                               | π(Ar)→σ*(SF <sub>6</sub> ) |
| STATE 4: E= 0.136525 au 3.715 eV 29963.8 cm <sup>-1</sup><br>139a -> 141a : 0.958127 (c= 0.97883986)                                                                                                                                      | n(P)→π*(Ar)                |
| STATE 5: E= 0.138623 au 3.772 eV 30424.2 cm <sup>-1</sup><br>139a -> 142a : 0.953192 (c= -0.97631555)                                                                                                                                     | n(P)→π*(Ar)                |
| STATE 6: E= 0.127361 au 3.466 eV 27952.4 cm <sup>-1</sup><br>134a -> 140a : 0.012136 (c= -0.11016499)<br>135a -> 140a : 0.037636 (c= 0.19400038)<br>136a -> 140a : 0.869511 (c= 0.93247555)<br>138a -> 140a : 0.076811 (c= 0.27714755)    | π(Ar)→σ*(SF <sub>6</sub> ) |
| STATE 7: E= 0.133536 au 3.634 eV 29307.8 cm <sup>-1</sup><br>135a -> 140a : 0.865677 (c= 0.93041780)<br>136a -> 140a : 0.066490 (c= -0.25785662)<br>138a -> 140a : 0.044764 (c= 0.21157576)                                               | π(Ar)→σ*(SF <sub>6</sub> ) |
| STATE 8: E= 0.128771 au 3.504 eV 28262.0 cm <sup>-1</sup><br>134a -> 140a : 0.930379 (c= 0.96456142)<br>137a -> 140a : 0.035748 (c= 0.18907064)<br>138a -> 140a : 0.026629 (c= 0.16318444)                                                | π(Ar)→σ*(SF <sub>6</sub> ) |
| STATE 9: E= 0.152115 au 4.139 eV 33385.5 cm <sup>-1</sup><br>134a -> 141a : 0.028163 (c= 0.16781758)<br>139a -> 143a : 0.922756 (c= 0.96060195)                                                                                           | n(P)→π*(Ar)                |
| STATE 10: E= 0.155244 au 4.224 eV 34072.0 cm <sup>-1</sup><br>135a -> 141a : 0.015172 (c= -0.12317525)<br>138a -> 141a : 0.019574 (c= -0.13990675)<br>138a -> 142a : 0.011962 (c= 0.10937207)<br>139a -> 144a : 0.907236 (c= -0.95248918) | n(P)→π*(Ar)                |
| STATE 11: E= 0.155718 au 4.237 eV 34176.2 cm <sup>-1</sup><br>135a -> 142a : 0.018709 (c= -0.13678120)<br>138a -> 142a : 0.041266 (c= 0.20314050)<br>139a -> 145a : 0.858179 (c= -0.92637948)<br>139a -> 146a : 0.040410 (c= -0.20102170) | n(P)→π*(Ar)                |
| STATE 12: E= 0.151820 au 4.131 eV 33320.5 cm <sup>-1</sup><br>133a -> 140a : 0.972155 (c= -0.98597942)                                                                                                                                    | π(Ar)→σ*(SF <sub>6</sub> ) |

137a -> 140a : 0.011200 (c= 0.10583167)

STATE 13: E= 0.171765 au 4.674 eV 37698.1 cm<sup>\*\*</sup>-1

136a -> 141a : 0.047571 (c= -0.21810753)

137a -> 142a : 0.053056 (c= 0.23033789)

139a -> 145a : 0.041210 (c= -0.20300149)

139a -> 146a : 0.817590 (c= 0.90420685)

n(P)→π\*(Ar)

#### UV/VIS Absorptions:

| State | Energy<br>(cm <sup>-1</sup> ) | Wavelength<br>(nm) | fosc<br>(au <sup>**2</sup> ) | T2<br>(au) | TX<br>(au) | TY<br>(au) | TZ       |
|-------|-------------------------------|--------------------|------------------------------|------------|------------|------------|----------|
| 1     | 18517.0                       | 540.0              | 0.000244680                  | 0.00435    | 0.03824    | -0.01144   | -0.05251 |
| 2     | 27256.1                       | 366.9              | 0.000024941                  | 0.00030    | -0.01184   | -0.00808   | -0.00979 |
| 3     | 28628.0                       | 349.3              | 0.003453138                  | 0.03971    | -0.10498   | 0.16881    | -0.01387 |
| 4     | 29963.8                       | 333.7              | 0.210879193                  | 2.31692    | 0.78343    | 1.27725    | -0.26795 |
| 5     | 30424.2                       | 328.7              | 0.225572584                  | 2.44086    | -1.34365   | 0.74648    | -0.27971 |
| 6     | 27952.4                       | 357.8              | 0.000135862                  | 0.00160    | 0.02465    | -0.03106   | 0.00523  |
| 7     | 29307.8                       | 341.2              | 0.000121647                  | 0.00137    | 0.03175    | -0.00241   | 0.01877  |
| 8     | 28262.0                       | 353.8              | 0.000050521                  | 0.00059    | -0.00916   | 0.02081    | -0.00846 |
| 9     | 33385.5                       | 299.5              | 0.006318732                  | 0.06231    | -0.08236   | 0.22557    | 0.06815  |
| 10    | 34072.0                       | 293.5              | 0.009836875                  | 0.09505    | 0.29797    | -0.04303   | 0.06642  |
| 11    | 34176.2                       | 292.6              | 0.005217208                  | 0.05026    | 0.04856    | 0.17544    | -0.13084 |
| 12    | 33320.5                       | 300.1              | 0.000012048                  | 0.00012    | 0.00286    | 0.00164    | -0.01040 |
| 13    | 37698.1                       | 265.3              | 0.013059688                  | 0.11405    | 0.03696    | 0.04434    | 0.33274  |

#### TD-DFT calculated electronic excitations of Et<sub>3</sub>P-SF<sub>6</sub>

##### Excited States:

STATE 1: E= 0.078413 au 2.134 eV 17209.7 cm<sup>\*\*</sup>-1

67a -> 68a : 0.999297 (c= -0.99964835)

n(P)→σ\*(SF<sub>6</sub>)

Assignment

STATE 2: E= 0.156305 au 4.253 eV 34304.9 cm<sup>\*\*</sup>-1

65a -> 68a : 0.077675 (c= 0.27870261)

66a -> 68a : 0.921376 (c= 0.95988355)

σ(P-C)→σ\*(SF<sub>6</sub>)

STATE 3: E= 0.153296 au 4.171 eV 33644.6 cm<sup>\*\*</sup>-1

65a -> 68a : 0.920979 (c= 0.95967658)

66a -> 68a : 0.077568 (c= -0.27851043)

σ(P-C)→σ\*(SF<sub>6</sub>)

#### UV/VIS Absorptions:

| State | Energy<br>(cm <sup>-1</sup> ) | Wavelength<br>(nm) | fosc<br>(au <sup>**2</sup> ) | T2<br>(au) | TX<br>(au) | TY<br>(au) | TZ      |
|-------|-------------------------------|--------------------|------------------------------|------------|------------|------------|---------|
| 1     | 17209.7                       | 581.1              | 0.007307751                  | 0.13979    | -0.31322   | 0.10266    | 0.17648 |
| 2     | 34304.9                       | 291.5              | 0.000068063                  | 0.00065    | 0.00109    | 0.02532    | 0.00330 |
| 3     | 33644.6                       | 297.2              | 0.000074602                  | 0.00073    | -0.00833   | 0.02554    | 0.00285 |



**TD-DFT calculated electronic excitations of (2-OMe-C<sub>6</sub>H<sub>4</sub>)<sub>3</sub>P**

Excited States:

Assignment

STATE 1: E= 0.151538 au 4.124 eV 33258.8 cm<sup>-1</sup>  
 92a -> 93a : 0.964646 (c= 0.98216397) n(P)→π\*(Ar)

STATE 2: E= 0.152207 au 4.142 eV 33405.5 cm<sup>-1</sup>  
 92a -> 94a : 0.964248 (c= -0.98196127) n(P)→π\*(Ar)

STATE 3: E= 0.168461 au 4.584 eV 36973.0 cm<sup>-1</sup>  
 87a -> 93a : 0.017246 (c= -0.13132237)  
 88a -> 94a : 0.016704 (c= 0.12924312)  
 89a -> 96a : 0.041280 (c= -0.20317523)  
 90a -> 93a : 0.068998 (c= -0.26267481)  
 91a -> 93a : 0.011089 (c= -0.10530224)  
 91a -> 94a : 0.059999 (c= -0.24494665)  
 92a -> 95a : 0.481551 (c= 0.69393892) n(P)→π\*(Ar)  
 92a -> 96a : 0.268018 (c= -0.51770483) n(P)→π\*(Ar)

STATE 4: E= 0.174815 au 4.757 eV 38367.6 cm<sup>-1</sup>  
 89a -> 94a : 0.019497 (c= 0.13963109)  
 90a -> 93a : 0.318440 (c= 0.56430467) π(Ar)→π\*(Ar)  
 91a -> 93a : 0.267880 (c= -0.51757145) π(Ar)→π\*(Ar)  
 91a -> 94a : 0.031460 (c= 0.17736899)  
 92a -> 95a : 0.181256 (c= 0.42574148) π(Ar)→π\*(Ar)  
 92a -> 96a : 0.081841 (c= 0.28607881)  
 92a -> 98a : 0.048211 (c= -0.21957068)

UV/VIS Absorptions:

| State | Energy<br>(cm <sup>-1</sup> ) | Wavelength<br>(nm) | fosc<br>(au <sup>**2</sup> ) | T2<br>(au) | TX<br>(au) | TY<br>(au) | TZ      |
|-------|-------------------------------|--------------------|------------------------------|------------|------------|------------|---------|
| 1     | 33258.8                       | 300.7              | 0.147138393                  | 1.45645    | 0.86741    | -0.72982   | 0.41400 |
| 2     | 33405.5                       | 299.4              | 0.147697463                  | 1.45556    | -0.80271   | -0.89513   | 0.09983 |
| 3     | 36973.0                       | 270.5              | 0.004817094                  | 0.04289    | -0.04623   | 0.05534    | 0.19414 |
| 4     | 38367.6                       | 260.6              | 0.021223631                  | 0.18211    | -0.39472   | -0.02293   | 0.16055 |

**TD-DFT calculated electronic excitations of (2-OMe-C<sub>6</sub>H<sub>4</sub>)<sub>3</sub>P-SF<sub>6</sub>**

Excited States:

Assignment

|                                                                                                                                                                                                                                                                                                                                                                                    |                            |
|------------------------------------------------------------------------------------------------------------------------------------------------------------------------------------------------------------------------------------------------------------------------------------------------------------------------------------------------------------------------------------|----------------------------|
| STATE 1: E= 0.097063 au    2.641 eV    21302.8 cm <sup>**</sup> -1<br>127a -> 128a : 0.987234 (c= 0.99359670)                                                                                                                                                                                                                                                                      | n(P)→σ*(SF <sub>6</sub> )  |
| STATE 2: E= 0.117861 au    3.207 eV    25867.6 cm <sup>**</sup> -1<br>124a -> 128a : 0.038421 (c= 0.19601384)<br>125a -> 128a : 0.019985 (c= 0.14136917)<br>126a -> 128a : 0.931705 (c= 0.96524870)                                                                                                                                                                                | π(Ar)→σ*(SF <sub>6</sub> ) |
| STATE 3: E= 0.118451 au    3.223 eV    25996.9 cm <sup>**</sup> -1<br>124a -> 128a : 0.070038 (c= -0.26464622)<br>125a -> 128a : 0.888672 (c= -0.94269418)<br>126a -> 128a : 0.037915 (c= 0.19471843)                                                                                                                                                                              | π(Ar)→σ*(SF <sub>6</sub> ) |
| STATE 4: E= 0.125884 au    3.425 eV    27628.3 cm <sup>**</sup> -1<br>124a -> 128a : 0.876555 (c= 0.93624495)<br>125a -> 128a : 0.087584 (c= -0.29594516)<br>126a -> 128a : 0.020823 (c= -0.14430318)                                                                                                                                                                              | π(Ar)→σ*(SF <sub>6</sub> ) |
| STATE 5: E= 0.146069 au    3.975 eV    32058.4 cm <sup>**</sup> -1<br>121a -> 128a : 0.014962 (c= -0.12231951)<br>122a -> 128a : 0.051301 (c= 0.22649625)<br>123a -> 128a : 0.909395 (c= 0.95362199)<br>124a -> 128a : 0.012235 (c= -0.11061007)                                                                                                                                   | π(Ar)→σ*(SF <sub>6</sub> ) |
| STATE 6: E= 0.151005 au    4.109 eV    33141.7 cm <sup>**</sup> -1<br>127a -> 129a : 0.960689 (c= 0.98014729)                                                                                                                                                                                                                                                                      | n(P)→π*(Ar)                |
| STATE 7: E= 0.153228 au    4.170 eV    33629.6 cm <sup>**</sup> -1<br>127a -> 130a : 0.951650 (c= -0.97552544)                                                                                                                                                                                                                                                                     | n(P)→π*(Ar)                |
| STATE 8: E= 0.145037 au    3.947 eV    31832.0 cm <sup>**</sup> -1<br>122a -> 128a : 0.938215 (c= -0.96861481)<br>123a -> 128a : 0.057034 (c= 0.23881781)                                                                                                                                                                                                                          | π(Ar)→σ*(SF <sub>6</sub> ) |
| STATE 9: E= 0.167548 au    4.559 eV    36772.6 cm <sup>**</sup> -1<br>122a -> 129a : 0.015324 (c= 0.12379019)<br>123a -> 130a : 0.015838 (c= -0.12585060)<br>124a -> 132a : 0.035329 (c= 0.18796072)<br>125a -> 129a : 0.054488 (c= 0.23342625)<br>126a -> 130a : 0.042623 (c= -0.20645355)<br>127a -> 131a : 0.519663 (c= 0.72087686)<br>127a -> 132a : 0.279739 (c= -0.52890376) | n(P)→π*(Ar)<br>n(P)→π*(Ar) |

UV/VIS Absorptions:

| State | Energy<br>(cm <sup>-1</sup> ) | Wavelength<br>(nm) | fosc<br>(au <sup>**2</sup> ) | T2<br>(au) | TX<br>(au) | TY<br>(au) | TZ       |
|-------|-------------------------------|--------------------|------------------------------|------------|------------|------------|----------|
| 1     | 21302.8                       | 469.4              | 0.003692845                  | 0.05707    | 0.17021    | -0.09403   | -0.13876 |
| 2     | 25867.6                       | 386.6              | 0.001418317                  | 0.01805    | -0.08748   | 0.08085    | 0.06214  |
| 3     | 25996.9                       | 384.7              | 0.000888841                  | 0.01126    | 0.08834    | -0.02834   | -0.05146 |
| 4     | 27628.3                       | 361.9              | 0.000784866                  | 0.00935    | -0.04783   | 0.04748    | 0.06935  |
| 5     | 32058.4                       | 311.9              | 0.000917902                  | 0.00943    | -0.08856   | 0.02152    | -0.03348 |
| 6     | 33141.7                       | 301.7              | 0.137981294                  | 1.37063    | 0.75084    | 0.88991    | -0.12221 |

|   |         |       |             |         |          |          |         |
|---|---------|-------|-------------|---------|----------|----------|---------|
| 7 | 33629.6 | 297.4 | 0.159683340 | 1.56320 | 0.95160  | -0.76634 | 0.26531 |
| 8 | 31832.0 | 314.1 | 0.000514410 | 0.00532 | -0.03391 | -0.06115 | 0.02075 |
| 9 | 36772.6 | 271.9 | 0.006429305 | 0.05756 | 0.02206  | 0.03612  | 0.23615 |

**TD-DFT calculated electronic excitations of (4-OMe-C<sub>6</sub>H<sub>4</sub>)<sub>3</sub>P**

Excited States:

Assignment

|              |              |              |                             |             |
|--------------|--------------|--------------|-----------------------------|-------------|
| STATE 1: E=  | 0.150089 au  | 4.084 eV     | 32940.7 cm <sup>**</sup> -1 |             |
| 89a -> 95a : | 0.010189 (c= | 0.10094044)  |                             |             |
| 92a -> 93a : | 0.953264 (c= | 0.97635238)  |                             | n(P)→π*(Ar) |
| STATE 2: E=  | 0.158000 au  | 4.299 eV     | 34677.0 cm <sup>**</sup> -1 |             |
| 92a -> 94a : | 0.919020 (c= | -0.95865505) |                             | n(P)→π*(Ar) |
| 92a -> 95a : | 0.022762 (c= | 0.15086965)  |                             |             |
| STATE 3: E=  | 0.158179 au  | 4.304 eV     | 34716.3 cm <sup>**</sup> -1 |             |
| 92a -> 94a : | 0.022711 (c= | 0.15070153)  |                             |             |
| 92a -> 95a : | 0.918320 (c= | 0.95828997)  |                             | n(P)→π*(Ar) |
| STATE 4: E=  | 0.167204 au  | 4.550 eV     | 36697.1 cm <sup>**</sup> -1 |             |
| 86a -> 94a : | 0.016497 (c= | 0.12844138)  |                             |             |
| 89a -> 95a : | 0.010268 (c= | 0.10133015)  |                             |             |
| 92a -> 96a : | 0.928593 (c= | -0.96363543) |                             | n(P)→π*(Ar) |
| STATE 5: E=  | 0.167373 au  | 4.554 eV     | 36734.1 cm <sup>**</sup> -1 |             |
| 86a -> 95a : | 0.015709 (c= | 0.12533664)  |                             |             |
| 89a -> 94a : | 0.010418 (c= | 0.10206632)  |                             |             |
| 89a -> 98a : | 0.012391 (c= | 0.11131318)  |                             |             |
| 92a -> 97a : | 0.927619 (c= | 0.96312961)  |                             | n(P)→π*(Ar) |

UV/VIS Absorptions:

| State | Energy<br>(cm <sup>-1</sup> ) | Wavelength<br>(nm) | fosc<br>(au <sup>**2</sup> ) | T2<br>(au) | TX<br>(au) | TY<br>(au) | TZ       |
|-------|-------------------------------|--------------------|------------------------------|------------|------------|------------|----------|
| 1     | 32940.7                       | 303.6              | 0.008221656                  | 0.08217    | 0.06698    | -0.06345   | -0.27140 |
| 2     | 34677.0                       | 288.4              | 0.170457324                  | 1.61826    | -0.18095   | -1.22595   | 0.28736  |
| 3     | 34716.3                       | 288.0              | 0.169374486                  | 1.60616    | -1.22406   | 0.11922    | -0.30597 |
| 4     | 36697.1                       | 272.5              | 0.009779757                  | 0.08773    | -0.05734   | -0.28510   | 0.05626  |
| 5     | 36734.1                       | 272.2              | 0.010475038                  | 0.09388    | 0.29299    | -0.04056   | 0.07994  |

**TD-DFT calculated electronic excitations of (4-OMe-C<sub>6</sub>H<sub>4</sub>)<sub>3</sub>P-SF<sub>6</sub>**

Excited States:

Assignment

|                                                                                                                                                                                                                                                                                               |                                                                          |
|-----------------------------------------------------------------------------------------------------------------------------------------------------------------------------------------------------------------------------------------------------------------------------------------------|--------------------------------------------------------------------------|
| STATE 1: E= 0.078198 au    2.128 eV    17162.6 cm <sup>**</sup> -1<br>126a -> 128a : 0.013222 (c= 0.11498503)<br>127a -> 128a : 0.985982 (c= 0.99296643)                                                                                                                                      | n(P)→σ*(SF <sub>6</sub> )                                                |
| STATE 2: E= 0.106356 au    2.894 eV    23342.5 cm <sup>**</sup> -1<br>125a -> 128a : 0.494748 (c= 0.70338296)<br>126a -> 128a : 0.492470 (c= 0.70176189)                                                                                                                                      | π(Ar)→σ*(SF <sub>6</sub> )<br>π(Ar)→σ*(SF <sub>6</sub> )                 |
| STATE 3: E= 0.102539 au    2.790 eV    22504.7 cm <sup>**</sup> -1<br>125a -> 128a : 0.502631 (c= -0.70896460)<br>126a -> 128a : 0.480913 (c= 0.69347900)                                                                                                                                     | π(Ar)→σ*(SF <sub>6</sub> )<br>π(Ar)→σ*(SF <sub>6</sub> )                 |
| STATE 4: E= 0.151682 au    4.127 eV    33290.3 cm <sup>**</sup> -1<br>127a -> 129a : 0.947260 (c= 0.97327280)                                                                                                                                                                                 | n(P)→π*(Ar)                                                              |
| STATE 5: E= 0.128936 au    3.509 eV    28298.3 cm <sup>**</sup> -1<br>121a -> 128a : 0.041415 (c= 0.20350788)<br>122a -> 128a : 0.058024 (c= 0.24088241)<br>123a -> 128a : 0.454038 (c= 0.67382313)<br>124a -> 128a : 0.438359 (c= -0.66208678)                                               | π(Ar)→σ*(SF <sub>6</sub> )<br>π(Ar)→σ*(SF <sub>6</sub> )                 |
| STATE 6: E= 0.131050 au    3.566 eV    28762.1 cm <sup>**</sup> -1<br>121a -> 128a : 0.076833 (c= 0.27718821)<br>122a -> 128a : 0.013162 (c= -0.11472657)<br>123a -> 128a : 0.456471 (c= -0.67562606)<br>124a -> 128a : 0.419348 (c= -0.64757105)<br>127a -> 130a : 0.024444 (c= -0.15634707) | π(Ar)→σ*(SF <sub>6</sub> )<br>π(Ar)→σ*(SF <sub>6</sub> )                 |
| STATE 7: E= 0.156733 au    4.265 eV    34399.0 cm <sup>**</sup> -1<br>123a -> 128a : 0.017487 (c= -0.13223900)<br>127a -> 130a : 0.895912 (c= 0.94652643)<br>127a -> 131a : 0.020919 (c= 0.14463372)                                                                                          | n(P)→π*(Ar)                                                              |
| STATE 8: E= 0.161126 au    4.384 eV    35363.0 cm <sup>**</sup> -1<br>121a -> 128a : 0.010846 (c= 0.10414296)<br>122a -> 128a : 0.049273 (c= 0.22197509)<br>122a -> 131a : 0.013516 (c= 0.11625856)<br>127a -> 130a : 0.017434 (c= 0.13203940)<br>127a -> 131a : 0.852380 (c= -0.92324426)    | n(P)→π*(Ar)                                                              |
| STATE 9: E= 0.132614 au    3.609 eV    29105.4 cm <sup>**</sup> -1<br>121a -> 128a : 0.138436 (c= 0.37207033)<br>122a -> 128a : 0.702650 (c= 0.83824241)<br>123a -> 128a : 0.035837 (c= -0.18930790)<br>124a -> 128a : 0.047561 (c= 0.21808486)<br>127a -> 131a : 0.062376 (c= 0.24975177)    | π(Ar)→σ*(SF <sub>6</sub> )<br>π(Ar)→σ*(SF <sub>6</sub> )<br>π(Ar)→π*(Ar) |
| STATE 10: E= 0.121049 au    3.294 eV    26567.2 cm <sup>**</sup> -1<br>121a -> 128a : 0.727886 (c= -0.85316225)<br>122a -> 128a : 0.170640 (c= 0.41308628)<br>123a -> 128a : 0.024721 (c= -0.15723014)                                                                                        | π(Ar)→σ*(SF <sub>6</sub> )<br>π(Ar)→σ*(SF <sub>6</sub> )                 |
| STATE 11: E= 0.168161 au    4.576 eV    36907.0 cm <sup>**</sup> -1<br>121a -> 130a : 0.011115 (c= 0.10543003)                                                                                                                                                                                |                                                                          |

123a -> 134a : 0.011417 (c= 0.10685175)

127a -> 132a : 0.908349 (c= -0.95307369)

127a -> 134a : 0.011897 (c= -0.10907211)

n(P)→π\*(Ar)

STATE 12: E= 0.170555 au 4.641 eV 37432.6 cm\*\*<sup>-1</sup>

121a -> 131a : 0.016035 (c= -0.12662879)

123a -> 130a : 0.012318 (c= -0.11098629)

127a -> 133a : 0.913503 (c= 0.95577367)

n(P)→π\*(Ar)

UV/VIS Absorptions:

| State | Energy<br>(cm-1) | Wavelength<br>(nm) | fosc<br>(au**2) | T2<br>(au) | TX<br>(au) | TY<br>(au) | TZ       |
|-------|------------------|--------------------|-----------------|------------|------------|------------|----------|
| 1     | 17162.6          | 582.7              | 0.000130797     | 0.00251    | -0.04189   | -0.02711   | 0.00442  |
| 2     | 23342.5          | 428.4              | 0.000043429     | 0.00061    | 0.00412    | 0.01399    | -0.02000 |
| 3     | 22504.7          | 444.4              | 0.000341615     | 0.00500    | 0.06876    | -0.00769   | -0.01452 |
| 4     | 33290.3          | 300.4              | 0.014025226     | 0.13870    | 0.25491    | 0.14012    | 0.23256  |
| 5     | 28298.3          | 353.4              | 0.000015664     | 0.00018    | 0.00407    | 0.00605    | -0.01136 |
| 6     | 28762.1          | 347.7              | 0.001266909     | 0.01450    | 0.00390    | -0.10674   | 0.05562  |
| 7     | 34399.0          | 290.7              | 0.137763314     | 1.31845    | -0.98398   | 0.58621    | -0.08111 |
| 8     | 35363.0          | 282.8              | 0.174122789     | 1.62100    | 0.63638    | 1.02123    | -0.41607 |
| 9     | 29105.4          | 343.6              | 0.011059738     | 0.12510    | -0.19373   | -0.27219   | 0.11608  |
| 10    | 26567.2          | 376.4              | 0.000108911     | 0.00135    | 0.02615    | -0.02530   | 0.00508  |
| 11    | 36907.0          | 271.0              | 0.009627953     | 0.08588    | 0.17814    | -0.23270   | -0.00006 |
| 12    | 37432.6          | 267.1              | 0.012177731     | 0.10710    | -0.27129   | -0.16572   | 0.07770  |

## Literature

- [1] M. N. Chevykalova, L. F. Manzhukova, N. V. Artemova, Y. N. Luzikov, I. E. Nifant'ev, E. E. Nifant'ev, *Russ.Chem.Bull., Int. Ed.* **2003**, *52*, 78.
- [2] P. W. Dyer, J. Fawcett, M. J. Hanton, R. D. W. Kemmitt, R. Padda, N. Singh, *Dalton Trans.* **2003**, 104.
- [3] D. M. Roundhill, S. G. N. Roundhill, W. B. Beaulieu, U. Bagchi, *Inorg. Chem.* **1980**, *19*, 3365.
- [4] TURBOMOLE V7.4 2019, a development of University of Karlsruhe and Forschungszentrum Karlsruhe GmbH, 1989-2007, TURBOMOLE GmbH, since 2007, available from <http://www.turbomole.com>.
- [5] J. Tao, J. P. Perdew, V. N. Staroverov, G. E. Scuseria, *Phys. Rev. Lett.* **2003**, *91*, 146401.
- [6] a) S. Grimme, J. Antony, S. Ehrlich, H. Krieg, *J. Chem. Phys.* **2010**, *132*, 154104; b) S. Grimme, S. Ehrlich, L. Goerigk, *J. Comput. Chem.* **2011**, *32*, 1456.
- [7] F. Weigend, R. Ahlrichs., *Phys. Chem. Chem. Phys.* **2005**, *7*, 3297.
- [8] S. Grimme, *Chem. Eur. J.* **2012**, *18*, 9955.
- [9] Y. Zhao, D. G. Truhlar, *J. Phys. Chem. A* **2005**, *109*, 5656.
- [10] a) A. Klamt, *J. Phys. Chem.* **1995**, *99*, 2224; b) F. Eckert, A. Klamt, COSMOtherm, Version C3.0, COSMOlogic GmbH & Co. KG, Leverkusen, Germany **2013**.
- [11] F. Neese, The ORCA program system, *Wiley Interdiscip. Rev.-Comput. Mol. Sci.* **2012**, *2*, 73.
- [12] a) A. D. Becke, *J. Chem. Phys.* **1993**, *98*, 5648; b) P. J. Stephens, F. J. Devlin, C. F. Chabalowski, M. J. Frisch, *J. Phys. Chem.* **1994**, *98*, 11623.
- [13] M. C. V. Barone, *J. Phys. Chem. A* **1998**, *102*, 1995.
- [14] T. Yanai, D. P. Tew, N. C. Handy, *Chem. Phys. Lett.* **2004**, *393*, 51.
